# Supplementary material for: Active travel behaviour in the family environment: protocol for the mixed-methods cross-sectional ARRIVE study
Source: PubMed Central journal article supplement — BMJ Open. 2022 Feb 1;12(2):e056383. doi: 10.1136/bmjopen-2021-056383 (PMC8808462; doi:10.1136/bmjopen-2021-056383), 2022-02-01
Supplement: bmjopen-2021-056383.draft_revisions.pdf [file bmjopen-2021-056383.draft_revisions.pdf]

# BMJ Open

BMJ Open is committed to open peer review. As part of this commitment we make the peer review history of every article we publish publicly available.

When an article is published we post the peer reviewers' comments and the authors' responses online. We also post the versions of the paper that were used during peer review. These are the versions that the peer review comments apply to.

The versions of the paper that follow are the versions that were submitted during the peer review process. They are not the versions of record or the final published versions. They should not be cited or distributed as the published version of this manuscript.

BMJ Open is an open access journal and the full, final, typeset and author-corrected version of record of the manuscript is available on our site with no access controls, subscription charges or pay-per-view fees (<http://bmjopen.bmj.com>).

If you have any questions on BMJ Open's open peer review process please email [info.bmjopen@bmj.com](mailto:info.bmjopen@bmj.com)

# BMJ Open

## Active Travel Behavior in the Family Environment: Protocol for the Mixed-Methods Cross-Sectional ARRIVE Study

|                               |                                                                                                                                                                                                                                                                                                                                                                                                                                                                                                                                                                                                                                               |
|-------------------------------|-----------------------------------------------------------------------------------------------------------------------------------------------------------------------------------------------------------------------------------------------------------------------------------------------------------------------------------------------------------------------------------------------------------------------------------------------------------------------------------------------------------------------------------------------------------------------------------------------------------------------------------------------|
| Journal:                      | <i>BMJ Open</i>                                                                                                                                                                                                                                                                                                                                                                                                                                                                                                                                                                                                                               |
| Manuscript ID                 | bmjopen-2021-056383                                                                                                                                                                                                                                                                                                                                                                                                                                                                                                                                                                                                                           |
| Article Type:                 | Protocol                                                                                                                                                                                                                                                                                                                                                                                                                                                                                                                                                                                                                                      |
| Date Submitted by the Author: | 16-Aug-2021                                                                                                                                                                                                                                                                                                                                                                                                                                                                                                                                                                                                                                   |
| Complete List of Authors:     | Reimers, Anne; Friedrich-Alexander-Universitat Erlangen-Nurnberg, Department of Sport Science and Sport<br>Marzi, Isabel; Friedrich-Alexander University Erlangen-Nuremberg, Department of Sport Sciene and Sport<br>Beck, Franziska; Friedrich-Alexander-Universitat Erlangen-Nurnberg, Department of Sport Science and Sport<br>Engels, Eliane ; Friedrich-Alexander-Universitat Erlangen-Nurnberg<br>Renninger, Denise; Technical University of Munich, Department of Sport and Health Sciences<br>Buttazzoni, Adrian; University of Waterloo<br>Krieger, Claus; Universität Hamburg<br>Demetriou, Yolanda; Technical University of Munich |
| Keywords:                     | SPORTS MEDICINE, SOCIAL MEDICINE, PUBLIC HEALTH                                                                                                                                                                                                                                                                                                                                                                                                                                                                                                                                                                                               |
|                               |                                                                                                                                                                                                                                                                                                                                                                                                                                                                                                                                                                                                                                               |

SCHOLARONE™  
Manuscripts

1  
2  
3 1 **Active Travel Behavior in the Family Environment: Protocol for the Mixed-Methods**  
4  
5 2 **Cross-Sectional ARRIVE Study**  
6  
7  
8 3

9  
10 4 Anne K. Reimers<sup>1#\*</sup>, Isabel Marzi<sup>1#</sup>, Franziska Beck<sup>1</sup>, Eliane Engels<sup>1</sup>, Denise Renninger<sup>2</sup>, Adrian  
11  
12 5 Buttazzoni<sup>3</sup>, Claus Krieger<sup>4</sup>, & Yolanda Demetriou<sup>2</sup>  
13

14 6 <sup>1</sup>Department of Sport Science and Sport, Friedrich-Alexander-University Erlangen-Nuremberg,  
15  
16 7 Gebbertstr. 123b, 91058 Erlangen, Germany  
17

18 8 <sup>2</sup>Department of Sport and Health Sciences, Technical University of Munich, Georg-Brauchle-Ring 60,  
19  
20 9 80992 Munich, Germany  
21

22 10 <sup>3</sup>School of Planning, Faculty of Environment, University of Waterloo, Waterloo, ON, Canada  
23

24 11 <sup>4</sup>Faculty of Education, Movement, Games and Sports Education, Universität Hamburg, Von-Melle-Park  
25  
26 12 8, 20146 Hamburg, Germany  
27  
28  
29 13

30  
31 14 Submitted to: *BMJ open (Protocol)*  
32

33 15 # Shared first authorship  
34

35 16 \*Corresponding Author:  
36

37 17 Anne Reimers  
38

39 18 Anne.reimers@fau.de  
40  
41  
42 19

43 20 **Abstract:**

44  
45 21 **Introduction:** Active travel is an important source of physical activity and is a primary contributor to  
46  
47 22 overall health among adolescents. To understand and promote active travel behavior in adolescents,  
48  
49 23 developing a more robust understanding of the predictors of active travel and its associated decision-  
50  
51 24 making processes are needed. Situated within a theoretical socio-ecological framework for adolescent  
52  
53 25 travel behavior, the mixed-methods ARRIVE study aims to quantitatively assess the influence of several  
54  
55 26 predictors of adolescent travel behavior, and to qualitatively understand the associated decision-making  
56  
57 27 processes of both adolescents and parents.  
58  
59  
60

1  
2  
3 28 **Methods and analysis:** Our mixed-methods approach will feature online surveys and semi-structured  
4  
5 29 interviews. The online questionnaire, developed in accordance with a theoretical framework of  
6  
7 30 adolescent active travel, will examine adolescent travel behavior with respect to four different  
8  
9 31 destinations while controlling for multiple relevant individual, social, and physical environment factors.  
10  
11 32 To enable the comparison of adolescent and parental perspectives, the questionnaire will be answered  
12  
13 33 by a representative sample of adolescents (11-15 years old) and their parents from Germany.  
14  
15 34 Our semi-structured interviews, likewise framed based on the central tenets of the theoretical framework  
16  
17 35 of adolescent active travel, will seek to explore the decision-making process of families regarding travel  
18  
19 36 mode choice via conducting interviews with each member (i.e., father, mother, adolescent). To  
20  
21 37 investigate travel decision-making processes, adolescents and their parents will be invited to talk about  
22  
23 38 trips they undertook using both active and passive transport modes during the last week. Thematic  
24  
25 39 analyses will be conducted to highlight the central concerns, priorities, and values of participants'  
26  
27 40 decision-making processes.

28  
29  
30 41 **Ethics and dissemination:** This study has received ethical approval from the ethics commission of the  
31  
32 42 Friedrich-Alexander-University Erlangen-Nuremberg. Study results will be disseminated at scientific  
33  
34 43 conferences and published in peer-reviewed journals. Additionally, study findings will be made publicly  
35  
36 44 available to relevant health, policy, and research stakeholders and groups.  
37  
38  
39  
40

## 41 **Strength and limitations of this study**

42  
43 47 Bullet points:

- 44  
45 48 • The ARRIVE study includes a large representative sample of parents and adolescents from  
46  
47 49 diverse neighborhoods and regions and different socio-economic backgrounds from Germany.
- 48  
49 50 • Situated within a theoretical socio-ecological framework, multiple theoretically relevant  
50  
51 51 predictors of adolescent active travel behavior and different modes of transport to four distinct  
52  
53 52 destinations will be assessed.
- 54  
55 53 • Reliable and valid tools in the form of online surveys, which were developed based on the  
56  
57 54 central tenets of a theoretical socio-ecological framework of adolescent active travel, will be  
58  
59 55 used to assess adolescent active travel behavior and its predictors.  
60

- 1  
2  
3 56 • Semi-structured interviews will seek to generate a novel and nuanced understanding of the  
4  
5 57 familial decision-making processes regarding transport mode choices from parental and  
6  
7 58 adolescent perspectives.  
8  
9 59 • Limitations include the cross-sectional design, self-report survey data, and a lack of objectively  
10  
11 60 measured physical environment characteristics.  
12  
13  
14 61

15  
16 62 **Keywords (3-10):**

17  
18 63 Active commuting, active transport, fathers, mothers, family, mixed-methods, framework, interview,  
19  
20 64 online questionnaire  
21  
22  
23 65

24  
25 66 **Introduction**

26  
27 67 Regular physical activity is an important source of overall health, can decrease the risk of non-  
28  
29 68 communicable diseases, and is linked to improved mental health (1). Long-term health benefits of  
30  
31 69 physical activity are well documented for children, adolescents (2, 3), and adults (4). However,  
32  
33 70 concerning low levels of physical activity among children, adolescent (5), and adults (6) in countries  
34  
35 71 across the globe demands urgent action. The World Health Organization (WHO) has observed that  
36  
37 72 current efforts to reduce global inactivity rates have been largely ineffective, and that more innovative  
38  
39 73 and comprehensive approaches to promote physical activity are needed (7).

40  
41  
42 74 Active travel, or any form of human-powered transportation (e.g., walking, biking), as a daily routine  
43  
44 75 (e.g., trips to/from school) is a low-cost and widely accessible source of physical activity (8).

45  
46 76 Longitudinal data supports that nine- to 18-year-old active commuters have higher levels of physical  
47  
48 77 activity during young adulthood and can maintain these behaviors for up to 12 years (9). Active travel  
49  
50 78 can also improve the emotional health of both adolescents and adults by increasing levels of happiness  
51  
52 79 and relaxation (10). Furthermore, trips made by bike or by foot are a sustainable means of daily transport;  
53  
54 80 have little-to-no CO<sub>2</sub> emissions; and are more affordable, reliable, cleaner, and less congested than trips  
55  
56 81 made by car (11).

57  
58  
59 82 Despite these many potential benefits of active commuting, percentages of active commuters have  
60  
61 83 declined in most countries (12-16). In Germany, like in many other countries, for example, only a

1  
2  
3 84 significant minority of adolescents currently walk or cycle to school (12, 17-19). Recent nationwide data  
4  
5 85 from the German MoMo Study showed that 17.7% of adolescent girls and 20.2% of adolescent boys  
6  
7 86 regularly walk to school and 21.5% of girls and 25.2% of boys take their bike, respectively (12).  
8  
9 87 To better understand adolescent travel mode decisions and travel behavior, and to enable the  
10  
11 88 development of evidence-based intervention programs that promote active travel in adolescents, a more  
12  
13 89 comprehensive analysis of the predictors of adolescent active travel and decision-making processes that  
14  
15 90 generates new insights and helps to illuminate new paths for programming is warranted. At present,  
16  
17 91 cross-sectional (20-23) and longitudinal (19, 24, 25) research has identified various individual- and  
18  
19 92 neighborhood-level factors related to adolescent active travel. However, while these studies and extant  
20  
21 93 theoretical socio-ecological models (26) and active travel frameworks (27-30) have outlined that  
22  
23 94 adolescent active travel is a multi-level phenomenon, little is known about the influence of family-based  
24  
25 95 predictors of adolescent active travel behavior, the decision-making processes within the family, and  
26  
27 96 especially about adolescent travel behavior to non-school destinations.  
28  
29 97 One comparatively understudied influence of potential consequence regarding adolescent active travel  
30  
31 98 behavior is family environment predictors. Although existing research confirms the importance of  
32  
33 99 parental controls with respect to adolescent transport mode choice (31-33), comprehensive studies of  
34  
35 100 family environment predictors of adolescent active commuting remain rather limited (34). Safety aspects  
36  
37 101 in terms of traffic safety and a child's own ability to travel safely and independently strongly influence  
38  
39 102 parental decision making on transport mode (31, 32, 35). Additionally, some parents prefer car usage to  
40  
41 103 spend time with their children (35). Other relevant factors, which influence parental decision on travel  
42  
43 104 behavior may include weather conditions (32), social norms and convenience (31, 35), and parenting  
44  
45 105 practices (32). Regarding the role of distance to school with respect to parental decision making, existing  
46  
47 106 evidence is more inconclusive: while one Swedish study (35) revealed that parents chauffeured their  
48  
49 107 children to school regardless of distance, another from Canada (31) found that transport mode choice  
50  
51 108 was influenced by perceptions of travel time and distance to school.  
52  
53  
54  
55 109 Presently, a large body of literature has highlighted the relevance of active travel as one domain of  
56  
57 110 physical activity in adolescents, and the necessity to consider multiple socio-ecological levels of  
58  
59  
60

1  
2  
3 111 influence regarding active travel. However, a number of research gaps regarding the predictors of and  
4  
5 112 decision-making associated with active travel in adolescents still exist.

6  
7 113 While existing literature has focused significantly on active travel to/ from school, only a few studies  
8  
9 114 have considered other highly frequented destinations. Trips to leisure facilities, shops, or the homes of  
10  
11 115 friends and relatives often represent as much or a greater proportion of all trips traveled by adolescents  
12  
13 116 than school commutes. For example, in Germany, adolescents 10-19 years old accumulate on average  
14  
15 117 2.8 trips taking 72 minutes and having a total distance of 29 kilometers per day (36). Of these trips,  
16  
17 118 school commutes account for 35.5% of trips, while 39.5% are made related to leisure activities, 14.5%  
18  
19 119 are related to shopping and everyday activities, and around 4% are made while accompanying  
20  
21 120 adults/parents to other locations. As it seems that there is a dearth of knowledge pertaining to how this  
22  
23 121 variety of daily trips to destinations other than school may contribute to adolescent health, study into  
24  
25 122 this topic represents an important opportunity as it may offer new insights into adolescent active travel  
26  
27 123 in reference to a more extensive set of predictors and social contexts, and ultimately help to promote  
28  
29 124 more active lifestyles.

30  
31  
32 125 The dynamics and impacts of parental and adolescent decision-making processes on adolescent active  
33  
34 126 travel is likewise relatively understudied. Perhaps most notably, little is currently known about how the  
35  
36 127 perceived social and physical environment facilitators and barriers to active travel among parents may  
37  
38 128 vary across diverse cohorts from various geographical regions and degrees of urbanization (37, 38).  
39  
40 129 Furthermore, while many previous studies have focused on children, few have addressed active travel  
41  
42 130 behavior in adolescents (37). Moreover, previous studies have not considered adolescent active travel  
43  
44 131 behavior in the context of the differing perspectives and attitudes of multiple family members (39, 40)  
45  
46 132 resulting in most existing studies focusing exclusively on either youth or parental perspectives and  
47  
48 133 neglecting the interrelation of both perspectives (41, 42). Such a precedent is an important oversight  
49  
50 134 given that in their comparative study of children and parental barriers on active commuting to school,  
51  
52 135 Aranda-Balboa et al. (43) found that there are significant differences between adolescents' and parents'  
53  
54 136 perspectives in terms of perceived social and environmental determinants of active travel exist.  
55  
56 137 Moreover, while other evidence has posited that child gender plays a significant role with regard to  
57  
58  
59  
60

1  
2  
3 138 physical activity and travel behavior (44-46), it has been observed that parental perspectives of this issue  
4  
5 139 have been largely limited to the views of mothers (e.g., (32, 47)).

6  
7 140 Additionally, only a few qualitative studies exist that provide a deeper understanding of the  
8  
9 141 interrelationships and familial decision-making processes on active travel behavior in adolescents (31,  
10  
11 142 32, 35). The inclusion of qualitative methods in the study of this issue can be beneficial as they may  
12  
13 143 help to capture, re-construct, and comprehend the social reality of groups or individuals as they focus  
14  
15 144 on the experiences, meanings, and perspectives of the participants (48).

16  
17 145 To better understand and promote adolescent active travel there are a few important research  
18  
19 146 opportunities to address, namely: family context predictors of adolescent active travel, the value and  
20  
21 147 impact of non-school commuting trips, and the influence of the decision-making processes of  
22  
23 148 adolescents and parents regarding travel behavior. The ARRIVE study (Active tRavel behavioR in the  
24  
25 149 famIlly EnVironmEnt) aims to address these gaps and develop a more comprehensive understanding of  
26  
27 150 adolescent active travel behavior through conducting a theoretically-informed, multi-component, and  
28  
29 151 mixed-methods investigation of German adolescents and parents.

30  
31  
32  
33 152

## 34 35 153 **Methods and analysis**

### 36 37 154 **Study design**

38  
39 155 The ARRIVE study, a mixed-methods cross-sectional study, intends to generate novel insights regarding  
40  
41 156 1) a range of predictors of adolescent active travel by considering trips to four commonly frequented  
42  
43 157 destinations (travel to/from school/workplace, homes of friends and/or relatives, shops, leisure  
44  
45 158 facilities), and 2) the intra-familial dynamics (i.e., family context predictors and decision-making  
46  
47 159 processes) that impact adolescent travel behaviors. ARRIVE's mixed-methods approach includes two  
48  
49 160 complementary studies: quantitative online surveys and qualitative semi-structured interviews. Both  
50  
51 161 studies will collect data from multiple groups, specifically adolescents between 11-15 years old and their  
52  
53 162 parents. Data collection for both studies will take place between June and October 2021.

54  
55  
56 163

### 57 58 164 **Theoretical framework**

59  
60

1  
2  
3 165 We developed the ARRIVE study based on Panter et al.'s "Conceptual Framework for the  
4  
5 166 Environmental Determinants of Active Travel in Children" (30) (see Figure 1). This framework serves  
6  
7 167 as the study's theoretical foundation as it provides a multi-level outline of the predictors of adolescents'  
8  
9 168 active travel based on the social-ecological model (21, 34). The framework considers physical (e.g.,  
10  
11 169 neighborhood design) and social (e.g., crime) environment factors, as well as individual factors for both  
12  
13 170 parents and youth (e.g., sociodemographic and psychosocial variables, attitudes). In the ARRIVE study,  
14  
15 171 we used these conceptual categories to identify relevant predictors of interest—e.g., personal  
16  
17 172 characteristics, attitudes, parental and adolescent perceptions of physical and social environment  
18  
19 173 barriers—that we will examine in our statistical models in order to explore how they impact the main  
20  
21 174 outcome (adolescent travel behavior) in relation to the four commonly frequented destinations (49-51).  
22  
23  
24 175

26 176 *Figure 1. Theoretical Framework for the ARRIVE study*  
27  
28 177

## 30 178 **Quantitative study**

### 32 179 *Aims*

34 180 The overarching aim of the quantitative online survey will be to empirically evaluate the theoretical  
35  
36 181 relationships proposed in Panter et al.'s "Conceptual Framework for the Environmental Determinants  
37  
38 182 of Active Travel in Children" (30). To systematically evaluate this theoretical model, our specific aims  
39  
40 183 are threefold. First, we will seek to identify predictors of adolescent travel behavior with respect to four  
41  
42 184 different destinations in order to discern whether the predictive strength of these correlates varies  
43  
44 185 between trip destinations. Second, we will aim to develop a more comprehensive understanding of  
45  
46 186 adolescent transport mode choice in the family context by comparing parent and adolescent perspectives  
47  
48 187 regarding transport mode choice. Third, we will investigate the moderating effects of several  
49  
50 188 theoretically relevant socio-demographic characteristics (e.g., sex/gender, migration background, and  
51  
52 189 residential area) on adolescent travel behavior.  
53  
54 190

### 58 191 *Sampling strategy*

59  
60

1  
2  
3 192 The survey makes use of an existing nationwide online panel (forsa.omninet) to which access is provided  
4  
5 193 by Forsa, a leading organization for public opinion polls. The recruitment for the survey will be  
6  
7 194 conducted entirely offline via telephone interviews, so as to ensure that those lacking internet access are  
8  
9 195 proportionately represented in the study. The panel is representative of the German population regarding  
10  
11 196 age, gender, education and place of residence. Based on this panel, a sample of adults living together  
12  
13 197 with adolescents aged 11- 15 years old will be recruited. The sample will include roughly the same  
14  
15 198 number of mothers and fathers. After giving informed consent to be contacted for the survey,  
16  
17 199 participants will receive an invitation e-mail with a link to the questionnaire.

20 200 Equivalent samples of parents (N = 500) and adolescents (N=500) will complete the survey. As previous  
21  
22 201 regression models suggest that individual and environmental predictors tend to explain approximately  
23  
24 202 8-40% of the total explained variance in active travel (18, 52, 53), a conservative value of 10% was  
25  
26 203 assumed to calculate effect size  $f^2$ . The G\*power a priori sample size calculation conducted at a power  
27  
28 204 of 0.8 and a significance level of 0.05 for a maximum of 25 potential correlates suggested a minimum  
29  
30 205 sample size of 226. To get deeper insights into gender differences, we plan to stratify our sample by  
31  
32 206 gender. Consequently, to allow for this stratification, we increased the sample size by roughly 50%  
33  
34 207 resulting in final sample estimates of around 500 parents and 500 adolescents.

35  
36  
37 208

### 38 39 209 *Data collection*

40  
41 210 Participants will be able to answer the online questionnaire using one of a tablet, smartphone, or  
42  
43 211 computer. The questionnaire includes two parts: a parent-focused section, and an adolescent-focused  
44  
45 212 section. After answering their portion of the questionnaire, parents will be asked to provide the link to  
46  
47 213 their child or, if there is more than one child in this age group in the family, to one randomly selected  
48  
49 214 child. To this end, parents will be instructed to select the child whose first name appears first in the  
50  
51 215 alphabet to fill out the adolescent portion of the survey. The survey is anticipated to take about 15  
52  
53 216 minutes to complete for adolescents and parents together.

54  
55  
56 217

### 57 58 218 *Measures*

1  
2  
3 219 To cover all relevant constructs, an online questionnaire has been developed based on already existing  
4  
5 220 scales (that were partly translated into German), modified scales, and additional single item questions.  
6  
7 221 The selection of scales and questions were derived from the central tenets of the theoretical framework;  
8  
9 222 all constructs mentioned in Figure 1 will be assessed via adolescent and parent self-reports. A detailed  
10  
11 223 description of all measures applied in the online questionnaire for parents and adolescents is provided  
12  
13 224 in Table 1.  
14  
15  
16 225

17  
18 226 *Table 1. Overview on Instrument used in the Parental and Adolescent Questionnaire*  
19  
20 227

### 21 22 228 *Data analysis*

23  
24 229 Data analysis will include descriptive statistics, an examination of normally distributed data, and  
25  
26 230 examinations of the homogeneity of variance. To prove internal consistencies of the adapted scales,  
27  
28 231 Cronbach's alpha will be calculated. Differences between groups (e.g., age, gender) will be calculated  
29  
30 232 using t-tests and analysis of variance for continuous variables, and chi-squares for categorical variables.  
31  
32 233 Outcome measures will consist of a categorical variable representing the different transport modes (e.g.,  
33  
34 234 walking, cycling, driving) per destination, a dichotomous variable (passive vs. active transport mode)  
35  
36 235 for each destination, and an overall score of active transport trips made. Multinomial (different transport  
37  
38 236 modes) and binary (active vs. passive travel) logistic regression models controlling for multiple relevant  
39  
40 237 sociodemographic variables will be used to identify predictors of adolescent active travel. Structural  
41  
42 238 equation model including moderation and mediation analyses will be used to evaluate the multi-step  
43  
44 239 pathways outlined in the theoretical framework. With regard to the relationship between parental and  
45  
46 240 adolescent travel behavior, correlation analyses will be conducted. To compare parental and adolescents'  
47  
48 241 perspective on barriers of active travel, binary logistic regression models will be performed. Analyses  
49  
50 242 will be conducted with R, Matlab, and SPSS.  
51  
52  
53 243

### 54 55 244 **Qualitative study**

#### 56 57 245 *Aims*

58  
59  
60

1  
2  
3 246 The aim of the qualitative semi-structured interviews will be to develop a deeper understanding of the  
4  
5 247 decision-making processes relevant to adolescent transport mode choice (see Figure 1, grey box).  
6  
7 248 Accordingly, the qualitative interviews will seek to provide a nuanced understanding of transport mode  
8  
9 249 choices by identifying novel concerns, preferences, and values relevant to travel behavior as articulated  
10  
11 250 by the adolescents and parents themselves. To complement our online survey which aims to examine if  
12  
13 251 and how various socio-demographic and socio-environmental factors predict adolescent travel behavior,  
14  
15 252 this qualitative investigation seeks to understand the experiences of adolescent travel behavior by  
16  
17 253 precisely exploring what and why certain influences centrally impact parental and adolescent decision-  
18  
19 254 making processes regarding transport mode choice.  
20  
21  
22 255

#### 23 24 256 *Sampling strategy*

25  
26 257 Participants for the qualitative survey will be recruited using theoretical sampling methods (54).  
27  
28 258 Therefore, the sample will not be defined by the onset of the study, but will be selected against the  
29  
30 259 background of theoretical problems outlined earlier and in accordance with our proposed analysis  
31  
32 260 processes. Our sampling methods will thus initially be based on ensuring the samples contain diversity  
33  
34 261 with respect to socio-economic status, migration status, gender, and environmental conditions (e.g.,  
35  
36 262 urban and rural living locations). When possible, we will interview both parents to capture the  
37  
38 263 perspectives of fathers and mothers. We anticipate that the final sample will consist of 10-15 adolescents  
39  
40 264 and 15-20 parents.  
41  
42  
43 265

#### 44 45 266 *Data collection*

46  
47 267 Interviews will be conducted with adolescent and parent participants separately. Prior to the data  
48  
49 268 collection process all interviewers received formal training from an interview expert. Sample interviews  
50  
51 269 were conducted to ensure the appropriateness of the interview guides.

52  
53 270 Interviews are anticipated to take around 30 minutes to complete. However, because deviations are  
54  
55 271 possible, for each participant an appointment time of 60 minutes will be made. After giving informed  
56  
57 272 consent and agreeing on an appointment, each participant will receive an individual link for an online  
58  
59 273 meeting to conduct the interview. Participants will be able to complete their interview from any desired

1  
2  
3 274 place so long as they have a stable internet connection and quiet surrounding. Before the start of the  
4  
5 275 recording, the objective and the interview procedure will be explained and participants will be reassured  
6  
7 276 of the voluntary nature of their involvement and their right to refuse to answer any questions. After  
8  
9 277 clarifying any questions that participants may have, the audio recording device will be turned on and the  
10  
11 278 interview will begin. At the end of the interview, the audio recording will stop.  
12

13  
14 279

### 15 280 *Interview Guideline*

16  
17  
18 281 The focus of the interviews for both groups of participants will be the travel behavior of adolescents and  
19  
20 282 the associated decision-making process. During the interviews, adolescents and their parents will be  
21  
22 283 encouraged to relive their travel experiences and their decision-making processes regarding mode choice  
23  
24 284 in relation to four different situations. In order to generate a thorough understanding of the differences  
25  
26 285 in decision-making processes when considering the choice of active vs. passive transport to the distinct  
27  
28 286 locations, different interview paths will be followed to ensure that the interview inquires about four (two  
29  
30 287 active, two passive trips) different travel type-location examples (see Figure 2). At the start of each  
31  
32 288 interview parents and adolescents will be instructed to first talk about a recent trip the latter made during  
33  
34 289 one of the days prior to the interview. This first trip may be undertaken by either an active or passive  
35  
36 290 means. Next, and to facilitate a comparison of factors affecting adolescent travel mode decision-making  
37  
38 291 processes, participants will be asked to remember a trip to the same destination that they made using  
39  
40 292 another transport mode (passive/active). To generate additional depth regarding understanding the  
41  
42 293 potential variety of relevant factors influencing participants' decision-making processes, this procedure  
43  
44 294 will be repeated for another destination that the adolescent traveled to in the previous week.  
45

46  
47 295

### 48 49 296 *Figure 2. Structure of the interview guide – decision-tree*

50  
51 297

52  
53 298 When discussing each of the four distinct trips, participants will be asked to describe their experiences  
54  
55 299 of traveling in reference to a series of topics (see Table 2). These topics are grouped into two blocks:  
56  
57 300 the participant's situation at home (i.e., conditions present before the adolescent's trip), and the situation  
58  
59 301 on the journey itself (i.e., social and environmental factors). To garner further information pertaining to  
60

the various circumstances which might affect the travel planning process, adolescents and parents will also be asked about a hypothetical commute to school, and specifically what factors (e.g., concerns, priorities) they would foremost consider when planning the trip. Interviews will close with adolescents and parents being asked which transport mode they would prefer and why. More detailed information regarding both interview guides are enclosed in the supplementary materials.

*Table 2. Topics addressed in the adolescents and parental interview*

|                                                     | <b>Situation</b>       | <b>Topic</b>            | <b>Examples</b>                                                                   |
|-----------------------------------------------------|------------------------|-------------------------|-----------------------------------------------------------------------------------|
| <b>Active/Passive Transport Mode to Destination</b> | situation at home      | General aspects         | e.g., weather, stress, behavior, particularities                                  |
|                                                     |                        | decision-making process | e.g., own behavior, parental behavior, decision on mode choice, rules, motivation |
|                                                     | situation on the route | Physical environment    | e.g., distance, characteristics of way, like/dislike                              |
|                                                     |                        | Social environment      | e.g., friends, siblings, companionship                                            |
| <b>Hypothetical way to school</b>                   | situation at home      | relevant factors        | e.g., weather, school situation, daily schedule                                   |
|                                                     |                        | decision-making process | e.g., parental influence, motivation, attitudes                                   |

### *Data analysis*

All audio recordings will be saved, treated as strictly confidential material, and eventually transcribed verbatim. With regard to the research questions, analysis will be conducted using thematic analysis (55) or content analysis (56). We will use theoretical sampling methods that begin based on the central tenets of the theoretical framework mentioned earlier (e.g., multiple groups, diverse socio-demographics) and will develop in accordance with our iterative data collection and analysis process.

### **Ethics and dissemination**

The ARRIVE study is designed in accordance with the ethical principles for research involving human subjects of the Declaration of Helsinki. Ethical approval for the study and its procedures were received from the ethics commission of the Friedrich-Alexander-University Erlangen-Nuremberg (Reg. 249\_21 B). Participation in both parts of the study is voluntary. Informed assent will be obtained from all adolescents and informed consent will be obtained from all parents that participate in this study. With

1  
2  
3 324 regard to the quantitative survey, no personally identifiable information will be included in the data set  
4  
5 325 and transferred from forsa to the study team. In the interviews, participants will not be addressed by  
6  
7 326 name, nor will any personal identifying information be requested. All data will be stored on central  
8  
9 327 servers of the Technical University of Munich/Germany and the University of Erlangen-  
10  
11 328 Nuremberg/Germany.

12  
13 329 The results of the ARRIVE study will be disseminated through peer-review journal articles, particularly  
14  
15 330 journals with international audiences, and will be presented at academic conferences. Additionally, the  
16  
17 331 results of this study will be disseminated to relevant stakeholders, and policy makers, as well as be made  
18  
19 332 publicly available for interested individuals, families, teachers, and caregivers via a project website and  
20  
21 333 public knowledge translation activities (e.g., public talks, community information sessions).  
22  
23  
24 334

#### 25 26 335 **Patient and public involvement statement**

27  
28 336 No medical patients and/or members of the public were involved in setting the research question nor  
29  
30 337 they were involved in developing plans for design (or implementation) of this study protocol.  
31  
32  
33 338

#### 34 35 339 **Discussion**

36  
37 340 Increasing physical activity in adolescents is an immediate and serious challenge for modern societies,  
38  
39 341 but one that if effectively addressed can contribute to preventing a number of chronic and non-  
40  
41 342 communicable diseases (7). The ARRIVE study aims to contribute to this prevention work by providing  
42  
43 343 a comprehensive multi-component and multi-group analysis of the socio-ecological determinants of  
44  
45 344 adolescent active travel behavior. Quantitative analyses of several theoretically relevant predictors of  
46  
47 345 adolescent active travel are intended to provide the necessary empirical evidence to illustrate the  
48  
49 346 influence of family context influences and non-school commutes on travel behaviors. Qualitative semi-  
50  
51 347 structured interviews are anticipated to provide deeper insights into the decision making-processes of  
52  
53 348 both adolescents and parents regarding travel mode behaviors. Together, the findings from both  
54  
55 349 components of the ARRIVE study should be of value to both practitioners and researchers as they will  
56  
57 350 offer a comprehensive evaluation of a more diverse set of trips, family predictors, and decision-making  
58  
59  
60

1  
2  
3 351 processes associated with adolescent active travel, as well as provide empirical evidence to support  
4  
5 352 public health active travel interventions for targeted adolescent groups and families.  
6

7 353

### 9 354 **Authors' contributions**

11 355 All authors made substantial contribution to the concept and design of the ARRIVE study. AKR and IM  
12  
13 356 prepared the first draft of the protocol article and finalized the manuscript. All authors contributed to the  
14  
15 357 preparation of the manuscript, provided edits to the manuscript and read and approved the final  
16  
17 358 manuscript.  
18

19 359

### 22 360 **Competing interests**

24 361 The authors declare that they have no competing interests.  
25  
26 362

### 29 363 **Funding statement**

31 364 This research received no specific grant from any funding agency in the public, commercial or not-for-  
32  
33 365 profit sectors.  
34

35 366

### 37 367 **References:**

- 39 368 1. WHO. WHO guidelines on physical activity and sedentary behaviour. Geneva: World Health  
40  
41 369 Organization; 2020.  
42  
43 370 2. Janssen I, LeBlanc AG. Systematic review of the health benefits of physical activity and fitness  
44  
45 371 in school-aged children and youth. International Journal of Behavioral Nutrition and Physical Activity.  
46  
47 372 2010;7(1):40.  
48  
49 373 3. Poitras VJ, Gray CE, Borghese MM, Carson V, Chaput JP, Janssen I, et al. Systematic review  
50  
51 374 of the relationships between objectively measured physical activity and health indicators in school-aged  
52  
53 375 children and youth. Appl Physiol Nutr Metab. 2016;41(6 Suppl 3):S197-239.  
54  
55 376 4. Warburton DE, Charlesworth S, Ivey A, Nettlefold L, Bredin SS. A systematic review of the  
56  
57 377 evidence for Canada's Physical Activity Guidelines for Adults. International Journal of Behavioral  
58  
59 378 Nutrition and Physical Activity. 2010;7:39-.

- 1  
2  
3 379 5. Guthold R, Stevens GA, Riley LM, Bull FC. Global trends in insufficient physical activity  
4  
5 380 among adolescents: a pooled analysis of 298 population-based surveys with 1.6 million participants.  
6  
7 381 The Lancet Child & Adolescent Health. 2019.
- 8  
9 382 6. Guthold R, Stevens GA, Riley LM, Bull FC. Worldwide trends in insufficient physical activity  
10  
11 383 from 2001 to 2016: a pooled analysis of 358 population-based surveys with 1.9 million participants.  
12  
13 384 The Lancet Global Health. 2018;6(10):e1077-e86.
- 14  
15 385 7. WHO. Global action plan on physical activity 2018–2030: more active people for a healthier  
16  
17 386 world. Geneva: World Health Organization; 2018.
- 18  
19 387 8. Chillón P, Ortega FB, Ruiz JR, Veidebaum T, Oja L, Mäestu J, et al. Active commuting to  
20  
21 388 school in children and adolescents: An opportunity to increase physical activity and fitness. Scand J  
22  
23 389 Public Health. 2010;38(8):873-9.
- 24  
25 390 9. Yang XL, Telama R, Hirvensalo M, Tammelin T, Viikari JSA, Raitakari OT. Active commuting  
26  
27 391 from youth to adulthood and as a predictor of physical activity in early midlife: The Young Finns Study.  
28  
29 392 Preventive Medicine. 2014;59:5-11.
- 30  
31 393 10. Ramanathan S, O'Brien C, Faulkner G, Stone M. Happiness in motion: emotions, well-being,  
32  
33 394 and active school travel. J Sch Health. 2014;84(8):516-23.
- 34  
35 395 11. Brand C, Dons E, Anaya Boig E, Avila-Palencia I, Clark A, Nazelle A, et al. The climate change  
36  
37 396 mitigation effects of daily active travel in cities. Transportation Research Part D: Transport and  
38  
39 397 Environment. 2021;93:102764.
- 40  
41 398 12. Reimers AK, Marzi I, Schmidt SCE, Niessner C, Oriwol D, Worth A, et al. Trends in active  
42  
43 399 commuting to school from 2003 to 2017 among children and adolescents from Germany: the MoMo  
44  
45 400 Study. Eur J Public Health. 2020.
- 46  
47 401 13. Smith M, Ikeda E, Duncan S, Maddison R, Hinckson E, Meredith-Jones K, et al. Trends and  
48  
49 402 measurement issues for active transportation in New Zealand's physical activity report cards for children  
50  
51 403 and youth. Journal of Transport & Health. 2019;15:789-.
- 52  
53 404 14. McDonald NC. Active transportation to school: trends among U.S. schoolchildren, 1969-2001.  
54  
55 405 Am J Prev Med. 2007;32(6):509-16.
- 56  
57  
58  
59  
60

- 1  
2  
3 406 15. Grize L, Bringolf-Isler B, Martin E, Braun-Fahrlander C. Trend in active transportation to  
4  
5 407 school among Swiss school children and its associated factors: three cross-sectional surveys 1994, 2000  
6  
7 408 and 2005. *International Journal of Behavioral Nutrition and Physical Activity*. 2010;7:28.  
8  
9 409 16. Pavelka J, Sigmundova D, Hamrik Z, Kalman M, Sigmund E, Mathisen F. Trends in Active  
10  
11 410 Commuting to School among Czech Schoolchildren from 2006 to 2014. *Cent Eur J Public Health*.  
12  
13 411 2017;25 Suppl 1:S21-s5.  
14  
15 412 17. Schönbach DMI, Brindley C, Reimers AK, Marques A, Demetriou Y. Socio-Demographic  
16  
17 413 Correlates of Cycling to School among 12-to 15-Year Olds in Southern Germany. *Int J Environ Res*  
18  
19 414 *Public Health*. 2020;17(24):9269.  
20  
21 415 18. Reimers AK, Jekauc D, Peterhans E, Wagner MO, Woll A. Prevalence and socio-demographic  
22  
23 416 correlates of active commuting to school in a nationwide representative sample of German adolescents.  
24  
25 417 *Preventive Medicine*. 2013;56(1):64-9.  
26  
27 418 19. Trang NHHD, Hong TK, Dibley MJ. Active Commuting to School Among Adolescents in Ho  
28  
29 419 Chi Minh City, Vietnam Change and Predictors in a Longitudinal Study, 2004 to 2009. *American*  
30  
31 420 *Journal of Preventive Medicine*. 2012;42(2):120-8.  
32  
33 421 20. Van Dyck D, De Bourdeaudhuij I, Cardon G, Deforche B. Criterion distances and correlates of  
34  
35 422 active transportation to school in Belgian older adolescents. *International Journal of Behavioral*  
36  
37 423 *Nutrition and Physical Activity*. 2010;7:87.  
38  
39 424 21. Pont K, Ziviani J, Wadley D, Bennett S, Abbott R. Environmental correlates of children's active  
40  
41 425 transportation: A systematic literature review. *Health & Place*. 2009;15(3):849-62.  
42  
43 426 22. Marques A, Peralta M, Sarmento H, Martins J, da Costa FC. Socioeconomic, Personal and  
44  
45 427 Behavioral Correlates of Active Commuting among Adolescents. *Montenegrin Journal of Sports*  
46  
47 428 *Science and Medicine*. 2016;5(1):29-34.  
48  
49 429 23. Martinez-Gomez D, Veiga OL, Gomez-Martinez S, Zapatera B, Calle ME, Marcos A, et al.  
50  
51 430 Behavioural correlates of active commuting to school in Spanish adolescents: the AFINOS (Physical  
52  
53 431 Activity as a Preventive Measure Against Overweight, Obesity, Infections, Allergies, and  
54  
55 432 Cardiovascular Disease Risk Factors in Adolescents) study. *Public Health Nutr*. 2011;14(10):1779-86.  
56  
57  
58  
59  
60

- 1  
2  
3 433 24. Yang L, Griffin S, Khaw KT, Wareham N, Panter J. Longitudinal associations between built  
4 434 environment characteristics and changes in active commuting. *BMC Public Health*. 2017;17:8.
- 5  
6  
7 435 25. Panter J, Corder K, Griffin SJ, Jones AP, van Sluijs EMF. Individual, socio-cultural and  
8 436 environmental predictors of uptake and maintenance of active commuting in children: longitudinal  
9 437 results from the SPEEDY study. *International Journal of Behavioral Nutrition and Physical Activity*.  
10 438 2013;10:12.
- 11  
12  
13  
14  
15 439 26. Sallis JF, Owen N, Fisher EB. Ecological models of health behavior. In: Glanz K, Rimer BK,  
16 440 Viswanath K, editors. *Health behavior and health education: theory, research, and practice*. 4th ed. San  
17 441 Francisco, Calif.: Jossey-Bass; 2008.
- 18  
19  
20  
21  
22 442 27. Zaragoza J, Corral A, Ikeda E, García-Bengoechea E, Aibar A. Assessment of psychological,  
23 443 social cognitive and perceived environmental influences on children's active transport to school. *Journal*  
24 444 *of Transport & Health*. 2020;16:100839.
- 25  
26  
27  
28 445 28. Pont K, Ziviani J, Wadley D, Abbott R. The Model of Children's Active Travel (M-CAT): a  
29 446 conceptual framework for examining factors influencing children's active travel. *Aust Occup Ther J*.  
30 447 2011;58(3):138-44.
- 31  
32  
33  
34 448 29. Gotschi T, Kahlmeier S, Castro A, Brand C, Cavill N, Kelly P, et al. Integrated Impact  
35 449 Assessment of Active Travel: Expanding the Scope of the Health Economic Assessment Tool (HEAT)  
36 450 for Walking and Cycling. *Int J Environ Res Public Health*. 2020;17(20).
- 37  
38  
39  
40 451 30. Panter JR, Jones AP, van Sluijs EM. Environmental determinants of active travel in youth: a  
41 452 review and framework for future research. *Int J Behav Nutr Phys Act*. 2008;5:34.
- 42  
43  
44  
45 453 31. Faulkner G, Richichi V, Buliung RN, Fusco C, Moola F. What's "quickest and easiest?":  
46 454 parental decision making about school trip mode. *International Journal of Behavioral Nutrition and*  
47 455 *Physical Activity*. 2010;7:11.
- 48  
49  
50  
51 456 32. Forsberg H, Rutberg S, Mikaelsson K, Lindqvist AK. It's about being the good parent: exploring  
52 457 attitudes and beliefs towards active school transportation. *Int J Circumpolar Health*.  
53 458 2020;79(1):1798113.
- 54  
55  
56  
57  
58  
59  
60

- 1  
2  
3 459 33. Francis J, Martin K, Wood L, Foster S. 'I'll be driving you to school for the rest of your life': A  
4 460 qualitative study of parents' fear of stranger danger. *Journal of Environmental Psychology*. 2017;53:112-  
5 461 20.  
6  
7  
8  
9 462 34. Ikeda E, Hinckson E, Witten K, Smith M. Associations of children's active school travel with  
10 463 perceptions of the physical environment and characteristics of the social environment: A systematic  
11 464 review. *Health & Place*. 2018;54:118-31.  
12  
13  
14  
15 465 35. Westman J, Friman M, Olsson LE. What Drives Them to Drive?—Parents' Reasons for  
16 466 Choosing the Car to Take Their Children to School. 2017;8(1970).  
17  
18  
19  
20 467 36. Nobis C, Kuhnimhof T. *Mobilität in Deutschland – MiD Ergebnisbericht*. Studie von infas,  
21 468 DLR, IVT und infas 360 im Auftrag des Bundesministers für Verkehr und digitale Infrastruktur (FE-  
22 469 Nr. 70.904/15). Bonn, Berlin: [www.mobilitaet-in-deutschland.de](http://www.mobilitaet-in-deutschland.de); 2018.  
23  
24  
25  
26 470 37. Aranda-Balboa MJ, Huertas-Delgado FJ, Herrador-Colmenero M, Cardon G, Chillón P.  
27 471 Parental barriers to active transport to school: a systematic review. *Int J Public Health*. 2019.  
28  
29  
30 472 38. Lu W, McKyer ELJ, Lee C, Goodson P, Ory MG, Wang S. Perceived barriers to children's  
31 473 active commuting to school: a systematic review of empirical, methodological and theoretical evidence.  
32 474 *International Journal of Behavioral Nutrition and Physical Activity*. 2014;11.  
33  
34  
35  
36 475 39. Niermann CYN, Gerards S, Kremers SPJ. Conceptualizing Family Influences on Children's  
37 476 Energy Balance-Related Behaviors: Levels of Interacting Family Environmental Subsystems (The  
38 477 LIFES Framework). *Int J Environ Res Public Health*. 2018;15(12).  
39  
40  
41  
42  
43 478 40. Niermann CYN, Kremers SPJ, Renner B, Woll A. Family Health Climate and Adolescents'  
44 479 Physical Activity and Healthy Eating: A Cross-Sectional Study with Mother-Father-Adolescent Triads.  
45 480 *PLOS ONE*. 2015;10(11):e0143599.  
46  
47  
48  
49 481 41. Tabak I, Mazur J, Nałęcz H. Family and individual predictors and mediators of adolescent  
50 482 physical activity. *Health Psychology Report*. 2017;4:333-44.  
51  
52  
53  
54 483 42. Faulkner G, Mitra R, Buliung R, Fusco C, Stone M. Children's outdoor playtime, physical  
55 484 activity, and parental perceptions of the neighbourhood environment. *International Journal of Play*.  
56 485 2015;4(1):84-97.  
57  
58  
59  
60

- 1  
2  
3 486 43. Aranda-Balboa MJ, Chillón P, Saucedo-Araujo RG, Molina-García J, Huertas-Delgado FJ.  
4  
5 487 Children and Parental Barriers to Active Commuting to School: A Comparison Study. *Int J Environ Res*  
6  
7 488 *Public Health*. 2021;18(5).  
8  
9 489 44. Sigmundova D, Sigmund E, Badura P, Hollein T. Parent-Child Physical Activity Association in  
10  
11 490 Families With 4-to 16-Year-Old Children. *Int J Environ Res Public Health*. 2020;17(11).  
12  
13 491 45. Reimers AK, Boxberger K, Schmidt SCE, Niessner C, Demetriou Y, Marzi I, et al. Social  
14  
15 492 Support and Modelling in Relation to Physical Activity Participation and Outdoor Play in Preschool  
16  
17 493 Children. *Children*. 2019;6(10):115.  
18  
19 494 46. Rodriguez-Rodriguez F, Huertas-Delgado FJ, Barranco-Ruiz Y, Aranda-Balboa MJ, Chillon P.  
20  
21 495 Are the Parents' and Their Children's Physical Activity and Mode of Commuting Associated? Analysis  
22  
23 496 by Gender and Age Group. *Int J Environ Res Public Health*. 2020;17(18).  
24  
25 497 47. Huertas-Delgado FJ, Herrador-Colmenero M, Villa-Gonzalez E, Aranda-Balboa MJ, Caceres  
26  
27 498 MV, Mandic S, et al. Parental perceptions of barriers to active commuting to school in Spanish children  
28  
29 499 and adolescents. *Eur J Public Health*. 2017;27(3):416-21.  
30  
31 500 48. Hammarberg K, Kirkman M, de Lacey S. Qualitative research methods: when to use them and  
32  
33 501 how to judge them. *Hum Reprod*. 2016;31(3):498-501.  
34  
35 502 49. Christian HE, Klinker CD, Villanueva K, Knuiman MW, Foster SA, Zubrick SR, et al. The  
36  
37 503 Effect of the Social and Physical Environment on Children's Independent Mobility to Neighborhood  
38  
39 504 Destinations. *J Phys Act Health*. 2015;12 Suppl 1:S84-93.  
40  
41 505 50. Kytä M, Oliver M, Ikeda E, Ahmadi E, Omiya I, Laatikainen T. Children as urbanites: mapping  
42  
43 506 the affordances and behavior settings of urban environments for Finnish and Japanese children.  
44  
45 507 *Children's Geographies*. 2018;16(3):319-32.  
46  
47 508 51. Veitch J, Carver A, Salmon J, Abbott G, Ball K, Crawford D, et al. What predicts children's  
48  
49 509 active transport and independent mobility in disadvantaged neighborhoods? *Health & Place*.  
50  
51 510 2017;44:103-9.  
52  
53 511 52. Wahlgren L, Schantz P. Exploring Bikeability in a Suburban Metropolitan Area Using the  
54  
55 512 Active Commuting Route Environment Scale (ACRES). *Int J Environ Res Public Health*.  
56  
57 513 2014;11(8):8276-300.  
58  
59  
60

- 1  
2  
3 514 53. Lemieux M, Godin G. How well do cognitive and environmental variables predict active  
4  
5 515 commuting? *International Journal of Behavioral Nutrition and Physical Activity*. 2009;6.  
6  
7 516 54. Nagl-Cupal M. Theoretical Sampling. *ProCare*. 2013;18(10):20-2.  
8  
9 517 55. Braun V, Clarke V. Using thematic analysis in psychology. *Qualitative Research in Psychology*.  
10 518 2006;3(2):77-101.  
11  
12  
13 519 56. Mayring P, Fenzl T. Qualitative Inhaltsanalyse. *Handbuch - Methoden der empirischen*  
14 520 *Sozialforschung*: Springer; 2019. p. 633-48.  
15  
16  
17  
18 521

For peer review only

**Table 1: Overview on Instrument used in the Parental and Adolescent Questionnaire**

| Construct                                   | Instrument                                                                                               | Description                                                                                                                                                                                                 | Reliability and Validity                                                                                                                                                        |
|---------------------------------------------|----------------------------------------------------------------------------------------------------------|-------------------------------------------------------------------------------------------------------------------------------------------------------------------------------------------------------------|---------------------------------------------------------------------------------------------------------------------------------------------------------------------------------|
| <b>Parent questionnaire</b>                 |                                                                                                          |                                                                                                                                                                                                             |                                                                                                                                                                                 |
| Parents' and child's socio-demographics     | Demographic Standards (57)                                                                               | Parent indicate their age, gender, migration background, education, employment and how many children under 18 are living in household. For their child, they indicate age, gender and school typ.           | -                                                                                                                                                                               |
| BMI (child and parent)                      | Self-reported and proxy-reported weight and height                                                       | Parent report their weight and height as well as their children's weight and height.                                                                                                                        | -                                                                                                                                                                               |
| Current situation in school due to COVID-19 | Single-item question                                                                                     | Due to COVID-19 pandemic, an additional question is used to indicate the current schooling situation: normal, home schooling, or alternate lessons.                                                         | -                                                                                                                                                                               |
| urbanization                                | BIK regions (58)                                                                                         | Parents indicate the degree of urbanization in dependence of inhabitants in their hometown.                                                                                                                 | -                                                                                                                                                                               |
| Home environment                            | MiD (59)                                                                                                 | Parents indicate car availability and bike availability (parent and child) and if they hold a driver license.                                                                                               | -                                                                                                                                                                               |
| Distance to school                          | Single-item question                                                                                     | Parent indicate the distance to their child's school from home in kilometers.                                                                                                                               | -                                                                                                                                                                               |
| Aerobic PA guideline compliance             | European Health Interview Survey – Physical Activity Questionnaire (EHIS-PAQ) (Finger et al., 2015)      | Six items are used to indicate parental aerobic PA guideline compliance (at least 150min aerobic PA per week)                                                                                               | The EHIS-PAQ is a reliable and valid tool to assess domain-specific PA as shown by adults from Germany (ICC range = 0.43-0.73) (60).                                            |
| Joint physical activity with child          | Modified item from the MoMo-AFB (61)                                                                     | Parents indicate on how many days in a normal week they are more than 60min physically active with their child.                                                                                             | -                                                                                                                                                                               |
| Active travel                               | MiD (59)                                                                                                 | To assess active travel in parents, they indicate transport mode, distance, and accompaniment of child to 4 different destinations (work, friends'/relatives' home, shopping, and leisure time activities). | -                                                                                                                                                                               |
| Perceived social and physical environment   | Modified version of the Parental Perception of Barriers Towards Active Commuting to School (PABACS) (62) | A 24-item scale is used to assess parental barriers towards active travel including general aspects, barriers for walking and barriers for cycling.                                                         | In 207 parents, the questionnaire showed good internal consistency (Cronbach's alpha $\alpha = 0.86$ ), moderate reliability (ICC range: 0.51-0.55) and moderate validity (62). |

|                                            |                                                                                                                      |                                                                                                                                                                                          |                                                                                                                                                                                                                                                                                    |
|--------------------------------------------|----------------------------------------------------------------------------------------------------------------------|------------------------------------------------------------------------------------------------------------------------------------------------------------------------------------------|------------------------------------------------------------------------------------------------------------------------------------------------------------------------------------------------------------------------------------------------------------------------------------|
| Parents' self-efficacy                     | Modified version of the Parents' Self-efficacy Scale (63)                                                            | A 13-item scale is used to assess parents' scheduling self-efficacy, parents' barrier self-efficacy and parents' support-seeking self-efficacy.                                          | Cronbach's $\alpha$ for the three first-order factors parents' scheduling self-efficacy, parents' barrier self-efficacy and parents' support-seeking self-efficacy were 0.95, 0.86, and 0.76, respectively (63).                                                                   |
| Environmental self-identity                | Environmental self-identity scale (64)                                                                               | Parents indicate their agreement to three items on environmental friendliness.                                                                                                           | The scale showed good internal consistency (Cronbach's Alpha $\alpha = 0.870$ ; average corrected item-total correlations = 0.755) (64).                                                                                                                                           |
| Health consciousness                       | Health consciousness scale (65)                                                                                      | Parents indicate their agreement to five items related to health practices on a 5-point-likert scale.                                                                                    | The scale showed good internal consistency (Cronbach's alpha $\alpha = 0.72$ ) (65).                                                                                                                                                                                               |
| <b>Adolescent questionnaire</b>            |                                                                                                                      |                                                                                                                                                                                          |                                                                                                                                                                                                                                                                                    |
| WHO PA guideline compliance                | MoMo-Physical-Activity-Questionnaire for Adolescents (MoMo-AFB) (61)                                                 | Children indicate on how many days in a normal week they are physically active for 60min or more.                                                                                        | In 9-17-year-olds, the MoMo-AFB showed good test-retest reliability (ICC=0.68) and validity (Spearman $r = 0.29$ ) (66).                                                                                                                                                           |
| Active travel                              | MiD (59) and New Version of Mode and Frequency of Commuting To and From School (67)                                  | Children indicate transport mode, accompaniment, and distance (in min and km) to school, to friends/relatives, to shopping opportunities and to leisure time activities.                 | The questionnaire is a reliable and feasible tool to assess active travel in adolescents ( $\kappa = 0.61-0.94$ ) (67).                                                                                                                                                            |
| Perceived social and physical environment  | Modified Version of the Barreras percibidas en el desplazamiento activo al centro educativo (BATAACE) (68)           | An 18-item scale is used to assess perceived barriers to active travel including environmental and safety factors as well as planning and psychosocial barriers.                         | The BATAACE showed good test-retest reliability (ICC range: 0.68-0.77) and internal consistency (Cronbach's alpha $\alpha = 0.59-0.76$ ) in a sample of 465 adolescents (68).                                                                                                      |
| Perceived parental autonomy support for AT | Modified Version of the Perceived Autonomy Support Scale for Active Commuting to and from School (PASS-ACS) (69)     | A 4-item scale assesses perceived parental support for active travel.                                                                                                                    | The PASS-ACS is a valid and reliable (Cronbach's alpha $\alpha = 0.85$ ; ICC = 0.88) tool to assess adolescents' perceived support for active travel (69).                                                                                                                         |
| Basic Psychological Need Satisfaction      | Modified Version of the Basic Psychological Need Satisfaction in Active Commuting to and from School (BPNS-ACS) (70) | A 12-item scale is used to assess adolescents' autonomy, competence, and relatedness need satisfaction with regard to active travel behavior.                                            | In 675 students (10-18 years), the BPNS-ACS showed acceptable internal consistency (autonomy satisfaction $\alpha = 0.81$ , competence satisfaction $\alpha = 0.92$ , and relatedness satisfaction $\alpha = 0.82$ ) and predictive validity (total variance explained: 24%) (70). |
| Motivation for active travel               | Modified version of the Behavioural Regulation in Active Commuting to and from School (BR-ACS) Questionnaire (71)    | A 23-item scale is used to assess motivational regulation in active travel including intrinsic motivation, integrated, identified, introjected and external regulation, and amotivation. | In 404 secondary students, the BR-ACS showed adequate internal consistency (Cronbach's alpha range $\alpha = 0.70-0.91$ ) and stability (ICC=0.74) and predictive validity (total variance explained: 57%) (71).                                                                   |

1. WHO. WHO guidelines on physical activity and sedentary behaviour. Geneva: World Health Organization; 2020.

- 1  
2  
3 2. Janssen I, LeBlanc AG. Systematic review of the health benefits of physical activity and fitness in school-aged children and youth. *International Journal*  
4 *of Behavioral Nutrition and Physical Activity*. 2010;7(1):40.  
5  
6
- 7 3. Poitras VJ, Gray CE, Borghese MM, Carson V, Chaput JP, Janssen I, et al. Systematic review of the relationships between objectively measured physical  
8 activity and health indicators in school-aged children and youth. *Appl Physiol Nutr Metab*. 2016;41(6 Suppl 3):S197-239.  
9  
10
- 11 4. Warburton DE, Charlesworth S, Ivey A, Nettlefold L, Bredin SS. A systematic review of the evidence for Canada's Physical Activity Guidelines for  
12 Adults. *International Journal of Behavioral Nutrition and Physical Activity*. 2010;7:39-  
13  
14
- 15 5. Guthold R, Stevens GA, Riley LM, Bull FC. Global trends in insufficient physical activity among adolescents: a pooled analysis of 298 population-  
16 based surveys with 1.6 million participants. *The Lancet Child & Adolescent Health*. 2019.  
17  
18
- 19 6. Guthold R, Stevens GA, Riley LM, Bull FC. Worldwide trends in insufficient physical activity from 2001 to 2016: a pooled analysis of 358 population-  
20 based surveys with 1.9 million participants. *The Lancet Global Health*. 2018;6(10):e1077-e86.  
21  
22
- 23 7. WHO. Global action plan on physical activity 2018–2030: more active people for a healthier world. Geneva: World Health Organization; 2018.  
24  
25
- 26 8. Chillón P, Ortega FB, Ruiz JR, Veidebaum T, Oja L, Mäestu J, et al. Active commuting to school in children and adolescents: An opportunity to increase  
27 physical activity and fitness. *Scand J Public Health*. 2010;38(8):873-9.  
28  
29
- 30 9. Yang XL, Telama R, Hirvensalo M, Tammelin T, Viikari JSA, Raitakari OT. Active commuting from youth to adulthood and as a predictor of physical  
31 activity in early midlife: The Young Finns Study. *Prev Med*. 2014;59:5-11.  
32  
33
- 34 10. Ramanathan S, O'Brien C, Faulkner G, Stone M. Happiness in motion: emotions, well-being, and active school travel. *J Sch Health*. 2014;84(8):516-  
35  
36  
37 23.  
38  
39  
40  
41  
42

- 1  
2  
3 11. Brand C, Dons E, Anaya Boig E, Avila-Palencia I, Clark A, Nazelle A, et al. The climate change mitigation effects of daily active travel in cities.  
4  
5 Transportation Research Part D: Transport and Environment. 2021;93:102764.  
6
- 7 12. Reimers AK, Marzi I, Schmidt SCE, Niessner C, Oriwol D, Worth A, et al. Trends in active commuting to school from 2003 to 2017 among children  
8 and adolescents from Germany: the MoMo Study. Eur J Public Health. 2020.  
9
- 10 13. Smith M, Ikeda E, Duncan S, Maddison R, Hinckson E, Meredith-Jones K, et al. Trends and measurement issues for active transportation in New  
11 Zealand's physical activity report cards for children and youth. Journal of Transport & Health. 2019;15:789-  
12  
13
- 14 14. McDonald NC. Active transportation to school: trends among U.S. schoolchildren, 1969-2001. Am J Prev Med. 2007;32(6):509-16.  
15
- 16 15. Grize L, Bringolf-Isler B, Martin E, Braun-Fahrlander C. Trend in active transportation to school among Swiss school children and its associated factors:  
17 three cross-sectional surveys 1994, 2000 and 2005. Int J Behav Nutr Phys Act. 2010;7:28.  
18  
19
- 20 16. Pavelka J, Sigmundova D, Hamrik Z, Kalman M, Sigmund E, Mathisen F. Trends in Active Commuting to School among Czech Schoolchildren from  
21 2006 to 2014. Cent Eur J Public Health. 2017;25 Suppl 1:S21-s5.  
22  
23
- 24 17. Schönbach DMI, Brindley C, Reimers AK, Marques A, Demetriou Y. Socio-Demographic Correlates of Cycling to School among 12-to 15-Year Olds  
25 in Southern Germany. Int J Environ Res Public Health. 2020;17(24):9269.  
26  
27
- 28 18. Reimers AK, Jekauc D, Peterhans E, Wagner MO, Woll A. Prevalence and socio-demographic correlates of active commuting to school in a nationwide  
29 representative sample of German adolescents. Prev Med. 2013;56(1):64-9.  
30  
31
- 32 19. Trang NHHD, Hong TK, Dibley MJ. Active Commuting to School Among Adolescents in Ho Chi Minh City, Vietnam Change and Predictors in a  
33 Longitudinal Study, 2004 to 2009. Am J Prev Med. 2012;42(2):120-8.  
34  
35  
36  
37  
38  
39  
40  
41  
42

- 1  
2  
3 20. Van Dyck D, De Bourdeaudhuij I, Cardon G, Deforche B. Criterion distances and correlates of active transportation to school in Belgian older  
4 adolescents. *Int J Behav Nutr Phys Act.* 2010;7:87.  
5  
6  
7 21. Pont K, Ziviani J, Wadley D, Bennett S, Abbott R. Environmental correlates of children's active transportation: A systematic literature review. *Health  
8 & Place.* 2009;15(3):849-62.  
9  
10  
11 22. Marques A, Peralta M, Sarmento H, Martins J, da Costa FC. Socioeconomic, Personal and Behavioral Correlates of Active Commuting among  
12 Adolescents. *Montenegrin Journal of Sports Science and Medicine.* 2016;5(1):29-34.  
13  
14 23. Martinez-Gomez D, Veiga OL, Gomez-Martinez S, Zapatera B, Calle ME, Marcos A, et al. Behavioural correlates of active commuting to school in  
15 Spanish adolescents: the AFINOS (Physical Activity as a Preventive Measure Against Overweight, Obesity, Infections, Allergies, and Cardiovascular Disease  
16 Risk Factors in Adolescents) study. *Public Health Nutr.* 2011;14(10):1779-86.  
17  
18  
19 24. Yang L, Griffin S, Khaw KT, Wareham N, Panter J. Longitudinal associations between built environment characteristics and changes in active  
20 commuting. *BMC Public Health.* 2017;17:8.  
21  
22  
23 25. Panter J, Corder K, Griffin SJ, Jones AP, van Sluijs EMF. Individual, socio-cultural and environmental predictors of uptake and maintenance of active  
24 commuting in children: longitudinal results from the SPEEDY study. *Int J Behav Nutr Phys Act.* 2013;10:12.  
25  
26  
27 26. Sallis JF, Owen N, Fisher EB. Ecological models of health behavior. In: Glanz K, Rimer BK, Viswanath K, editors. *Health behavior and health  
28 education: theory, research, and practice.* 4th ed. San Francisco, Calif.: Jossey-Bass; 2008.  
29  
30  
31 27. Zaragoza J, Corral A, Ikeda E, García-Bengoechea E, Aibar A. Assessment of psychological, social cognitive and perceived environmental influences  
32 on children's active transport to school. *Journal of Transport & Health.* 2020;16:100839.  
33  
34  
35  
36  
37  
38  
39  
40  
41  
42  
43  
44  
45  
46

- 1  
2  
3 28. Pont K, Ziviani J, Wadley D, Abbott R. The Model of Children's Active Travel (M-CAT): a conceptual framework for examining factors influencing  
4 children's active travel. *Aust Occup Ther J*. 2011;58(3):138-44.  
5  
6  
7 29. Gotschi T, Kahlmeier S, Castro A, Brand C, Cavill N, Kelly P, et al. Integrated Impact Assessment of Active Travel: Expanding the Scope of the Health  
8 Economic Assessment Tool (HEAT) for Walking and Cycling. *Int J Environ Res Public Health*. 2020;17(20).  
9  
10  
11 30. Panter JR, Jones AP, van Sluijs EM. Environmental determinants of active travel in youth: a review and framework for future research. *Int J Behav*  
12 *Nutr Phys Act*. 2008;5:34.  
13  
14  
15 31. Faulkner G, Richichi V, Buliung RN, Fusco C, Moola F. What's "quickest and easiest?": parental decision making about school trip mode. *International*  
16 *Journal of Behavioral Nutrition and Physical Activity*. 2010;7:11.  
17  
18  
19 32. Forsberg H, Rutberg S, Mikaelsson K, Lindqvist AK. It's about being the good parent: exploring attitudes and beliefs towards active school  
20 transportation. *Int J Circumpolar Health*. 2020;79(1):1798113.  
21  
22  
23 33. Francis J, Martin K, Wood L, Foster S. 'I'll be driving you to school for the rest of your life': A qualitative study of parents' fear of stranger danger.  
24 *Journal of Environmental Psychology*. 2017;53:112-20.  
25  
26  
27 34. Ikeda E, Hinckson E, Witten K, Smith M. Associations of children's active school travel with perceptions of the physical environment and characteristics  
28 of the social environment: A systematic review. *Health & Place*. 2018;54:118-31.  
29  
30  
31 35. Westman J, Friman M, Olsson LE. What Drives Them to Drive?—Parents' Reasons for Choosing the Car to Take Their Children to School.  
32 *2017;8(1970)*.  
33  
34  
35 36. Nobis C, Kuhnimhof T. *Mobilität in Deutschland – MiD Ergebnisbericht*. Studie von infas, DLR, IVT und infas 360 im Auftrag des Bundesministers  
36 für Verkehr und digitale Infrastruktur (FE-Nr. 70.904/15). Bonn, Berlin: [www.mobilitaet-in-deutschland.de](http://www.mobilitaet-in-deutschland.de); 2018.  
37  
38  
39  
40  
41  
42  
43  
44  
45  
46

- 1  
2  
3 37. Aranda-Balboa MJ, Huertas-Delgado FJ, Herrador-Colmenero M, Cardon G, Chillón P. Parental barriers to active transport to school: a systematic  
4 review. *Int J Public Health*. 2019.  
5  
6  
7 38. Lu W, McKyer ELJ, Lee C, Goodson P, Ory MG, Wang S. Perceived barriers to children's active commuting to school: a systematic review of empirical,  
8 methodological and theoretical evidence. *Int J Behav Nutr Phys Act*. 2014;11.  
9  
10  
11 39. Niermann CYN, Gerards S, Kremers SPJ. Conceptualizing Family Influences on Children's Energy Balance-Related Behaviors: Levels of Interacting  
12 Family Environmental Subsystems (The LIFES Framework). *Int J Environ Res Public Health*. 2018;15(12).  
13  
14  
15 40. Niermann CYN, Kremers SPJ, Renner B, Woll A. Family Health Climate and Adolescents' Physical Activity and Healthy Eating: A Cross-Sectional  
16 Study with Mother-Father-Adolescent Triads. *PLOS ONE*. 2015;10(11):e0143599.  
17  
18  
19 41. Tabak I, Mazur J, Nałęcz H. Family and individual predictors and mediators of adolescent physical activity. *Health Psychology Report*. 2017;4:333-44.  
20  
21  
22 42. Faulkner G, Mitra R, Buliung R, Fusco C, Stone M. Children's outdoor playtime, physical activity, and parental perceptions of the neighbourhood  
23 environment. *International Journal of Play*. 2015;4(1):84-97.  
24  
25  
26 43. Aranda-Balboa MJ, Chillón P, Saucedo-Araujo RG, Molina-García J, Huertas-Delgado FJ. Children and Parental Barriers to Active Commuting to  
27 School: A Comparison Study. *Int J Environ Res Public Health*. 2021;18(5).  
28  
29  
30 44. Sigmundova D, Sigmund E, Badura P, Hollein T. Parent-Child Physical Activity Association in Families With 4-to 16-Year-Old Children. *Int J Environ*  
31 *Res Public Health*. 2020;17(11).  
32  
33  
34 45. Reimers AK, Boxberger K, Schmidt SCE, Niessner C, Demetriou Y, Marzi I, et al. Social Support and Modelling in Relation to Physical Activity  
35 Participation and Outdoor Play in Preschool Children. *Children*. 2019;6(10):115.  
36  
37  
38  
39  
40  
41  
42  
43  
44  
45  
46

- 1  
2  
3 46. Rodriguez-Rodriguez F, Huertas-Delgado FJ, Barranco-Ruiz Y, Aranda-Balboa MJ, Chillon P. Are the Parents' and Their Children's Physical Activity  
4 and Mode of Commuting Associated? Analysis by Gender and Age Group. *Int J Environ Res Public Health*. 2020;17(18).  
5  
6  
7 47. Huertas-Delgado FJ, Herrador-Colmenero M, Villa-Gonzalez E, Aranda-Balboa MJ, Caceres MV, Mandic S, et al. Parental perceptions of barriers to  
8 active commuting to school in Spanish children and adolescents. *Eur J Public Health*. 2017;27(3):416-21.  
9  
10  
11 48. Hammarberg K, Kirkman M, de Lacey S. Qualitative research methods: when to use them and how to judge them. *Hum Reprod*. 2016;31(3):498-501.  
12  
13 49. Christian HE, Klinker CD, Villanueva K, Knuiman MW, Foster SA, Zubrick SR, et al. The Effect of the Social and Physical Environment on Children's  
14 Independent Mobility to Neighborhood Destinations. *J Phys Act Health*. 2015;12 Suppl 1:S84-93.  
15  
16  
17 50. Kytta M, Oliver M, Ikeda E, Ahmadi E, Omiya I, Laatikainen T. Children as urbanites: mapping the affordances and behavior settings of urban  
18 environments for Finnish and Japanese children. *Children's Geographies*. 2018;16(3):319-32.  
19  
20  
21 51. Veitch J, Carver A, Salmon J, Abbott G, Ball K, Crawford D, et al. What predicts children's active transport and independent mobility in disadvantaged  
22 neighborhoods? *Health & Place*. 2017;44:103-9.  
23  
24  
25 52. Wahlgren L, Schantz P. Exploring Bikeability in a Suburban Metropolitan Area Using the Active Commuting Route Environment Scale (ACRES). *Int*  
26 *J Environ Res Public Health*. 2014;11(8):8276-300.  
27  
28  
29 53. Lemieux M, Godin G. How well do cognitive and environmental variables predict active commuting? *Int J Behav Nutr Phys Act*. 2009;6.  
30  
31  
32 54. Nagl-Cupal M. Theoretical Sampling. *ProCare*. 2013;18(10):20-2.  
33  
34  
35 55. Braun V, Clarke V. Using thematic analysis in psychology. *Qualitative Research in Psychology*. 2006;3(2):77-101.  
36  
37 56. Mayring P, Fenzl T. Qualitative Inhaltsanalyse. *Handbuch - Methoden der empirischen Sozialforschung*: Springer; 2019. p. 633-48.  
38  
39 57. Statistisches Bundesamt. *Statistik und Wirtschaft - Demographische Standards*. Wiesbaden: Statistisches Bundesamt 2016.  
40  
41  
42  
43  
44  
45  
46

- 1  
2  
3 58. Behrens K, Böltken F, Dittmar H, Götsche F, Gutfleisch R, Habla H, et al. Regionale Standards: Ausgabe 2019. Köln2019.
- 4  
5 59. Eggs J, Follmer R, Gruschwitz D, Nobis C, Bäumer M, Pfeiffer M. Mobilität in Deutschland - MiD Methodenbericht. Studie vom infas, DLR, IVT und  
6 infas 360 im Auftrag des Bundesministers für Verkehr und digitale Infrastruktur. Bonn, Berlin: [www.mobilität-in-deutschland.de](http://www.mobilität-in-deutschland.de); 2018.
- 7  
8 60. Baumeister SE, Ricci C, Kohler S, Fischer B, Töpfer C, Finger JD, et al. Physical activity surveillance in the European Union: reliability and validity  
9 of the European Health Interview Survey-Physical Activity Questionnaire (EHIS-PAQ). International Journal of Behavioral Nutrition and Physical Activity.  
10 2016;13(1):61.
- 11  
12 61. Schmidt SCE, Will N, Henn A, Reimers A, Woll A. Der Motorik-Modul Aktivitätsfragebogen MoMo-AFB : Leitfaden zur Anwendung und  
13 Auswertung. 2016 2016//.
- 14  
15 62. Huertas-Delgado FJ, Molina-García J, Van Dyck D, Chillón P. A questionnaire to assess parental perception of barriers towards active commuting to  
16 school (PABACS): Reliability and validity. J Transp Health. 2019;12:97-104.
- 17  
18 63. Lu W, McKyer ELJ, Lee C, Ory MG, Goodson P, Wang S. Children's active commuting to school: an interplay of self-efficacy, social economic  
19 disadvantage, and environmental characteristics. International Journal of Behavioral Nutrition and Physical Activity. 2015;12(1):29.
- 20  
21 64. Fallah Zavareh M, Mehdizadeh M, Nordfjærn T. Active travel as a pro-environmental behaviour: An integrated framework. Transportation Research  
22 Part D: Transport and Environment. 2020;84:102356.
- 23  
24 65. Dutta-Bergman MJ. Primary sources of health information: comparisons in the domain of health attitudes, health cognitions, and health behaviors.  
25 Health Commun. 2004;16(3):273-88.
- 26  
27 66. Jekauc D, Wagner MO, Kahlert D, Woll A. Reliabilität und Validität des MoMo-Aktivitätsfragebogens für Jugendliche (MoMo-AFB). Diagnostica.  
28 2013.
- 29  
30  
31  
32  
33  
34  
35  
36  
37  
38  
39  
40  
41  
42  
43  
44  
45  
46

- 1  
2  
3 67. Segura-Diaz JM, Rojas-Jimenez A, Barranco-Ruiz Y, Murillo-Pardo B, Saucedo-Araujo RG, Aranda-Balboa MJ, et al. Feasibility and Reliability of a  
4 Questionnaire to Assess the Mode, Frequency, Distance and Time of Commuting to and from School: The PACO Study. *Int J Environ Res Public Health*.  
5 2020;17(14).  
6  
7  
8  
9 68. Molina-Garcia J, Queralt A, Estevan I, Alvarez O, Castillo I. [Perceived barriers to active commuting to school: reliability and validity of a scale]. *Gac*  
10 *Sanit*. 2016;30(6):426-31.  
11  
12  
13 69. Burgueño R, González-Cutre D, Sevil-Serrano J, Herrador-Colmenero M, Segura-Díaz JM, Medina-Casabón J, et al. Psychometric properties of the  
14 teachers', parents' and peers' versions of the Perceived Autonomy Support Scale for Active Commuting to and from School (PASS-ACS) in children and  
15 adolescents. *Travel Behav Soc*. 2020;20:322-30.  
16  
17  
18  
19 70. Burgueño R, González-Cutre D, Sevil-Serrano J, Herrador-Colmenero M, Segura-Díaz JM, Medina-Casabón J, et al. Validation of the Basic  
20 Psychological Need Satisfaction in Active Commuting to and from School (BPNS-ACS) Scale in Spanish young people. *J Transp Health*. 2020;16:100825.  
21  
22  
23  
24 71. Burgueño R, González-Cutre D, Sevil-Serrano J, Herrador-Colmenero M, Segura-Díaz JM, Medina-Casabón J, et al. Understanding the motivational  
25 processes involved in adolescents' active commuting behaviour: Development and validation of the Behavioural Regulation in Active Commuting to and from  
26 School (BR-ACS) Questionnaire. *Transport Res F-Traf*. 2019;62:615-25.  
27  
28  
29  
30  
31  
32  
33  
34  
35  
36  
37  
38  
39  
40  
41  
42  
43  
44  
45  
46

1  
2  
3  
4  
5  
6  
7  
8  
9  
10  
11  
12  
13  
14  
15  
16  
17  
18  
19  
20  
21  
22  
23  
24  
25  
26  
27  
28  
29  
30  
31  
32  
33  
34  
35  
36  
37  
38  
39  
40  
41  
42  
43  
44  
45  
46



BMJ Open



1  
2  
3  
4  
5  
6  
7  
8  
9  
10  
11  
12  
13  
14  
15  
16  
17  
18  
19  
20  
21  
22  
23  
24  
25  
26  
27  
28  
29  
30  
31  
32  
33  
34  
35  
36  
37  
38  
39  
40  
41  
42  
43  
44  
45  
46

Supplementary material

A. Interview guideline - parents

| Interview topic (general)                 | Guiding question                                                                                                                | Interview topic (specific) | Follow-up questions I                                                                                                    | Follow-up questions II                                                          |
|-------------------------------------------|---------------------------------------------------------------------------------------------------------------------------------|----------------------------|--------------------------------------------------------------------------------------------------------------------------|---------------------------------------------------------------------------------|
| <b>Interview guide for situations 1-4</b> |                                                                                                                                 |                            |                                                                                                                          |                                                                                 |
| Way - decision making process             | Think again carefully about the situation before your child left with [mode of travel]. Can you describe the situation at home? | Stress                     | Can you describe the situation at home in detail?                                                                        | Was there anything special about the day?                                       |
|                                           |                                                                                                                                 | Weather                    | What was the weather like?                                                                                               |                                                                                 |
|                                           |                                                                                                                                 | Behavior                   | Can you describe what you did before your child left home?                                                               | How did you feel about it? / How did it make you feel?                          |
|                                           |                                                                                                                                 | Behavior family            | How did you behave? How did your child / siblings behave?                                                                | How did you feel about it?                                                      |
|                                           |                                                                                                                                 | Decision                   | Who decided that your child used [mode of travel]?<br>Can you describe the extent to which you influenced this decision? | Can you describe what was running through your mind when you made the decision? |
|                                           |                                                                                                                                 | Rules                      | Are there any rules in the family regarding [mode of travel]?                                                            | Can you describe why these rules exist / are important to you?                  |
|                                           |                                                                                                                                 | Persuasion/reason          | Can you remember a specific reason why your child used [mode of travel]?                                                 | Is there a personal persuasion behind them?                                     |
|                                           |                                                                                                                                 | Motivation                 | To what extent did you motivate your child to use [mode of travel]?                                                      |                                                                                 |
| Way – physical environment                | Do you know where your child drove/walked along?                                                                                | Parental perspective       | How do you feel about the way?<br>Is there anything on the way that worries you?                                         | How do you deal with it?                                                        |

|                                         |                                                                                                                                                                                 |                      |                                                                                                       |                                                                                                          |
|-----------------------------------------|---------------------------------------------------------------------------------------------------------------------------------------------------------------------------------|----------------------|-------------------------------------------------------------------------------------------------------|----------------------------------------------------------------------------------------------------------|
|                                         | Can you describe the way as precisely as possible so that I can get an idea?                                                                                                    | Child's perspective  | How do you think your child likes the way?                                                            | How do you feel about it?                                                                                |
|                                         |                                                                                                                                                                                 | Behavior child – way | Can you describe what your child has done/experienced along the way?                                  |                                                                                                          |
| Way – social environment                | Did someone accompany your child?                                                                                                                                               | Friends company      | How does it happen?                                                                                   | What do you say to that?                                                                                 |
|                                         |                                                                                                                                                                                 | Parents company      | What do you do on the way together? Can you describe why you accompany your child?                    | How is this for you - to use [mode of travel] with your child?                                           |
| <b>Interview guide for situations 5</b> |                                                                                                                                                                                 |                      |                                                                                                       |                                                                                                          |
| Fictional way to school                 | Now please think about tomorrow, when your child goes to school. How do you plan (together with your child) the way to school? Or does your child plan the way to school alone? | Relevant factors     | What factors are you or your child considering for planning tomorrow? What are you thinking about it? | What would change your decision? Are you satisfied with the decision? How do you evaluate this decision? |
|                                         |                                                                                                                                                                                 | Decision             | To what extent do you involve your child?                                                             |                                                                                                          |

**B. Interview guideline - youth**

| <b>Interview topic (general)</b>          | <b>Guiding question</b>                                                                                                            | <b>Interview topic (specific)</b> | <b>Follow-up questions I</b>                                                                | <b>Follow-up questions II</b>                                                                                                                    |
|-------------------------------------------|------------------------------------------------------------------------------------------------------------------------------------|-----------------------------------|---------------------------------------------------------------------------------------------|--------------------------------------------------------------------------------------------------------------------------------------------------|
| <b>Interview guide for situations 1-4</b> |                                                                                                                                    |                                   |                                                                                             |                                                                                                                                                  |
| Way – decision making process             | Think again exactly about the situation before you [mode of travel]. Can you describe how it came about that you [mode of travel]? | Stress                            | What was the situation like?<br>Was it stressful?                                           | Was there anything special about the day?                                                                                                        |
|                                           |                                                                                                                                    | Weather                           | What was the weather like?                                                                  |                                                                                                                                                  |
|                                           |                                                                                                                                    | Behavior                          | What did you do before you left the house?                                                  |                                                                                                                                                  |
|                                           |                                                                                                                                    | Behavior family                   | How did you behave? How did your mom/dad/siblings behave?                                   | How did you feel at that time?<br>What was running through your mind?                                                                            |
|                                           |                                                                                                                                    | Decision                          | Who decided that you [mode of travel]?/ How did you decide to [mode of travel]?             | How do you feel about that? That you can decide alone / That your parents decide for you? How did you come to your decision to [mode of travel]? |
|                                           |                                                                                                                                    | Rules                             | Are there any rules in your family?                                                         | Do you know why your parents make the decision the way they do?                                                                                  |
|                                           |                                                                                                                                    | Persuasion/reason                 | Was there anything in particular that convinced you to [mode of travel]?                    |                                                                                                                                                  |
| Way – physical environment                | Think about where you drove/walked along. Can you describe the way exactly so that I can get an idea of it?                        | Motivation                        | What did motivate you?                                                                      |                                                                                                                                                  |
|                                           |                                                                                                                                    | Distance                          | How long did you spend on the way?<br>How far is the way?                                   | How do you feel about the way?                                                                                                                   |
|                                           |                                                                                                                                    | Behavior                          | How did you drive/walk? Do you do anything special on the way?                              | How did you feel while [mode of travel]? How was [mode of travel] for you?                                                                       |
|                                           |                                                                                                                                    | Way - characteristics             | How did you like the way? What do you like about the way?<br>What do you not like about it? |                                                                                                                                                  |

|                                        |                                                                                                                          |                              |                                                                                                                                                                                                     |                                                                                                                                  |
|----------------------------------------|--------------------------------------------------------------------------------------------------------------------------|------------------------------|-----------------------------------------------------------------------------------------------------------------------------------------------------------------------------------------------------|----------------------------------------------------------------------------------------------------------------------------------|
|                                        |                                                                                                                          |                              | What did you like about [mode of travel]?                                                                                                                                                           |                                                                                                                                  |
| Way – social environment               | Did anyone accompany you on the way? Can you describe the situation on the way in detail?                                | Company                      | Can you tell me about how you rode together?<br>Can you tell me what you did along the way?                                                                                                         | What was it like between you?<br>Was there anything that you particularly liked?<br>Was there anything you did not like so much? |
|                                        |                                                                                                                          |                              | Do you meet other people along the way?                                                                                                                                                             |                                                                                                                                  |
| <b>Interview guide for situation 5</b> |                                                                                                                          |                              |                                                                                                                                                                                                     |                                                                                                                                  |
| Fictional way to school                | Now think about tomorrow. Can you describe to me how you decide how to get to school? How do you plan the way to school? | Relevant factors<br>Decision | Which factors do you take into account in the planning?<br>What are you considering?<br>Do you check with your parents?<br>Whom do you involve in the decision?<br>How do you come to the decision? | What would change your decision?<br>Are you satisfied with the decision?<br>How do you evaluate this decision?                   |

## Note from the Editors: Instructions for reviewers of study protocols

---

Since launching in 2011, BMJ Open has published study protocols for planned or ongoing research studies. If data collection is complete, we will not consider the manuscript.

Publishing study protocols enables researchers and funding bodies to stay up to date in their fields by providing exposure to research activity that may not otherwise be widely publicised. This can help prevent unnecessary duplication of work and will hopefully enable collaboration. Publishing protocols in full also makes available more information than is currently required by trial registries and increases transparency, making it easier for others (editors, reviewers and readers) to see and understand any deviations from the protocol that occur during the conduct of the study.

The scientific integrity and the credibility of the study data depend substantially on the study design and methodology, which is why the study protocol requires a thorough peer-review.

*BMJ Open* will consider for publication protocols for any study design, including observational studies and systematic reviews.

Some things to keep in mind when reviewing the study protocol:

- Protocol papers should report planned or ongoing studies. The dates of the study should be included in the manuscript.
- Unfortunately we are unable to customize the reviewer report form for study protocols. As such, some of the items (i.e., those pertaining to results) on the form should be scores as Not Applicable (N/A).
- While some baseline data can be presented, there should be no results or conclusions present in the study protocol.
- For studies that are ongoing, it is generally the case that very few changes can be made to the methodology. As such, requests for revisions are generally clarifications for the rationale or details relating to the methods. If there is a major flaw in the study that would prevent a sound interpretation of the data, we would expect the study protocol to be rejected.

# BMJ Open

## Active Travel Behavior in the Family Environment: Protocol for the Mixed-Methods Cross-Sectional ARRIVE Study

|                                 |                                                                                                                                                                                                                                                                                                                                                                                                                                                                                                                                                                                        |
|---------------------------------|----------------------------------------------------------------------------------------------------------------------------------------------------------------------------------------------------------------------------------------------------------------------------------------------------------------------------------------------------------------------------------------------------------------------------------------------------------------------------------------------------------------------------------------------------------------------------------------|
| Journal:                        | <i>BMJ Open</i>                                                                                                                                                                                                                                                                                                                                                                                                                                                                                                                                                                        |
| Manuscript ID                   | bmjopen-2021-056383.R1                                                                                                                                                                                                                                                                                                                                                                                                                                                                                                                                                                 |
| Article Type:                   | Protocol                                                                                                                                                                                                                                                                                                                                                                                                                                                                                                                                                                               |
| Date Submitted by the Author:   | 14-Dec-2021                                                                                                                                                                                                                                                                                                                                                                                                                                                                                                                                                                            |
| Complete List of Authors:       | Reimers, Anne; Friedrich-Alexander-Universitat Erlangen-Nurnberg, Department of Sport Science and Sport<br>Marzi, Isabel; Friedrich-Alexander University Erlangen-Nuremberg, Department of Sport Sciene and Sport<br>Beck, Franziska; Friedrich-Alexander-Universitat Erlangen-Nurnberg, Sport Science and Sport<br>Engels, Eliane ; Friedrich-Alexander-Universitat Erlangen-Nurnberg<br>Renninger, Denise; Technical University of Munich<br>Buttazzoni, Adrian; University of Waterloo<br>Krieger, Claus; Universität Hamburg<br>Demetriou, Yolanda; Technical University of Munich |
| <b>Primary Subject Heading</b>: | Public health                                                                                                                                                                                                                                                                                                                                                                                                                                                                                                                                                                          |
| Secondary Subject Heading:      | Sports and exercise medicine                                                                                                                                                                                                                                                                                                                                                                                                                                                                                                                                                           |
| Keywords:                       | SPORTS MEDICINE, SOCIAL MEDICINE, PUBLIC HEALTH                                                                                                                                                                                                                                                                                                                                                                                                                                                                                                                                        |
|                                 |                                                                                                                                                                                                                                                                                                                                                                                                                                                                                                                                                                                        |

SCHOLARONE™  
Manuscripts

1  
2  
3 1 **Active Travel Behavior in the Family Environment: Protocol for the Mixed-Methods**

4  
5 2 **Cross-Sectional ARRIVE Study**

6  
7 3  
8  
9 4 Anne K. Reimers<sup>1#\*</sup>, Isabel Marzi<sup>1#</sup>, Franziska Beck<sup>1</sup>, Eliane Engels<sup>1</sup>, Denise Renninger<sup>2</sup>, Adrian  
10 5 Buttazzoni<sup>3</sup>, Claus Krieger<sup>4</sup>, & Yolanda Demetriou<sup>2</sup>

11  
12 6 <sup>1</sup>Department of Sport Science and Sport, Friedrich-Alexander-University Erlangen-Nuremberg,  
13 7 Gebbertstr. 123b, 91058 Erlangen, Germany

14  
15 8 <sup>2</sup>Department of Sport and Health Sciences, Technical University of Munich, Georg-Brauchle-Ring 60,  
16 9 80992 Munich, Germany

17  
18 10 <sup>3</sup>School of Planning, Faculty of Environment, University of Waterloo, Waterloo, ON, Canada

19  
20 11 <sup>4</sup>Faculty of Education, Movement, Games and Sports Education, Universität Hamburg, Von-Melle-Park  
21 12 8, 20146 Hamburg, Germany

22  
23 13  
24  
25 14 Submitted to: *BMJ open (Protocol)*

26  
27 15 # Shared first authorship

28  
29 16 \*Corresponding Author:

30  
31 17 Anne Reimers

32  
33 18 Anne.reimers@fau.de

34  
35 19

1  
2  
3 **Abstract:**  
4

5 **Introduction:** Active travel is an important source of physical activity and a primary contributor to  
6  
7 overall health among adolescents. To understand and promote active travel behavior in adolescents,  
8  
9 developing a more robust understanding of the predictors of active travel and its associated decision-  
10  
11 making processes is needed. Situated within a theoretical socio-ecological framework for adolescent  
12  
13 travel behavior, the mixed-methods ARRIVE study aims to quantitatively assess the influence of several  
14  
15 predictors of adolescent travel behavior, and to qualitatively understand the associated decision-making  
16  
17 processes of both adolescents and parents.  
18  
19

20 **Methods and analysis:** Our mixed-methods approach will feature online surveys and semi-structured  
21  
22 interviews. The online questionnaire, developed in accordance with a theoretical framework of  
23  
24 adolescent active travel, will examine adolescent travel behavior with respect to four different  
25  
26 destinations while controlling for multiple relevant individual, social, and physical environment factors.  
27  
28 To enable the comparison of adolescent and parental perspectives, the questionnaire will be answered  
29  
30 by a representative sample of German adolescents (11–15 years old) and their parents.  
31  
32

33 Our semi-structured interviews, likewise framed based on the central tenets of the theoretical framework  
34  
35 of adolescent active travel, will seek to explore the decision-making process of families regarding travel  
36  
37 mode choice via conducting interviews with each member (i.e., father, mother, adolescent). To  
38  
39 investigate travel decision-making processes, adolescents and their parents will be invited to talk about  
40  
41 trips they undertook using both active and passive transport modes during the last week. Thematic  
42  
43 analyses will be conducted to highlight the central concerns, priorities, and values of participants'  
44  
45 decision-making processes.  
46  
47

48 **Ethics and dissemination:** This study has received ethical approval from the ethics commission of the  
49  
50 Friedrich-Alexander-University Erlangen-Nuremberg. Study results will be disseminated at scientific  
51  
52 conferences and published in peer-reviewed journals. Additionally, study findings will be made publicly  
53  
54 available to relevant health, policy, and research stakeholders and groups.  
55  
56

57  
58  
59  
60

## 46 **Strength and limitations of this study**

### 47 **Bullet points:**

- 48 • The quantitative part of the ARRIVE study includes a large representative sample of German  
49 parents and adolescents from diverse neighborhoods and regions and different socio-economic  
50 backgrounds. However, the sample might not be representative of typical German travel  
51 behaviors as they result from many additional factors like urban infrastructure accessibility,  
52 family work arrangements, and other socio-demographic factors (e.g., vehicle ownership) that  
53 we aren't able to control for in this study.
- 54 • Situated within a theoretical socio-ecological framework, multiple theoretically relevant  
55 predictors of adolescent active travel behavior and different modes of transport to four distinct  
56 destinations will be assessed.
- 57 • Reliable and valid tools in the form of online surveys, which were developed based on the  
58 central tenets of a theoretical socio-ecological framework of adolescent active travel, will be  
59 used to assess adolescent active travel behavior and its predictors.
- 60 • Semi-structured interviews will seek to generate a novel and nuanced understanding of the  
61 familial decision-making processes regarding transport mode choices from both parental and  
62 adolescent perspectives.
- 63 • Limitations include the cross-sectional design, self-report survey data, and a lack of objectively  
64 measured physical environment characteristics.

### 66 **Keywords (3–10):**

67 Active commuting, active transport, fathers, mothers, family, mixed-methods, framework, interview,  
68 online questionnaire

69

## 70 **Introduction**

71 Regular physical activity is an important source of overall health, can decrease the risk of non-  
72 communicable diseases, and is linked to improved mental health (1). Long-term health benefits of  
73 physical activity are well documented for children, adolescents (2, 3), and adults (4). However,  
74 concerning low levels of physical activity among children, adolescent (5), and adults (6) in countries  
75 across the globe demands urgent action. The World Health Organization (WHO) has observed that  
76 current efforts to reduce global inactivity rates have been largely ineffective, and that more innovative  
77 and comprehensive approaches to promote physical activity are needed (7).

78 Active travel, that is any form of human-powered transportation (e.g., walking, biking), as a daily routine  
79 (e.g., trips to/from school) is a low-cost and widely accessible source of physical activity (8). But despite  
80 many potential benefits of active commuting, percentages of active commuters have declined in most  
81 countries (9-13). In Germany, like in many other countries, for example, only a significant minority of  
82 adolescents currently walk or cycle to school (9, 14-16). Recent nationwide data from the German  
83 MoMo Study showed that 17.7% of adolescent girls and 20.2% of adolescent boys regularly walk to  
84 school, while 21.5% of girls and 25.2% of boys cycle to school (9).

85 To better understand adolescent travel mode decisions and travel behavior, as well as to enable the  
86 development of evidence-based intervention programs that promote active travel in adolescents, a more  
87 comprehensive analysis of the predictors of adolescent active travel and decision-making processes is  
88 warranted. At present, cross-sectional (17-20) and longitudinal (16, 21, 22) research has identified  
89 various individual- and neighborhood-level factors related to adolescent active travel. However, while  
90 these studies and extant theoretical socio-ecological models (23) and active travel frameworks (24-27)  
91 have outlined that adolescent active travel is a multi-level phenomenon, little is known about the  
92 influence of family-level predictors of adolescent active travel behavior, the decision-making processes  
93 within the family, and especially about adolescent travel behavior to non-school destinations.

94 One comparatively understudied influence of potential consequence regarding adolescent active travel  
95 behavior is family environment predictors (e.g., parental support, role modelling, availability of a  
96 bicycle). Although recent study confirms the importance of parental controls with respect to adolescent  
97 transport mode choice (28-30), comprehensive studies of family environment predictors of adolescent

1  
2  
3 98 active commuting remain rather limited (31). To date, studies have largely focused on examining only  
4  
5 99 singular elements of the family-level. For example, recent works have found safety aspects in terms of  
6  
7 100 traffic safety and a child's own ability to travel safely and independently strongly influence parental  
8  
9 101 decision making on transport mode (28, 29, 32), and that some parents prefer car usage to spend time  
10  
11 102 with their children (32). Other noted relevant factors in this regard include social norms and convenience  
12  
13 103 (28, 32), and parenting practices (29) as significant individual predictors. In other cases, however, family  
14  
15 104 environment influences are ambiguous. When examining the role of distance to school and its interaction  
16  
17 105 with family-level factors, existing evidence is inconclusive: while one Swedish study (32) revealed that  
18  
19 106 parents chauffeured their teenagers to school regardless of distance, another from Canada (28) found  
20  
21 107 that transport mode choice was influenced by perceptions of travel time and distance to school.  
22  
23 108 Ultimately, given this combination of a lack of comprehensive investigations and uncertainty in other  
24  
25 109 areas, there is a need to more comprehensively (e.g., examine the interaction of parent and adolescent  
26  
27 110 perceptions) consider family environment influences of adolescent active travel.  
28  
29 111 Similarly, while existing literature has focused significantly on active travel to/ from school, only a few  
30  
31 112 studies have considered other highly frequented destinations. Trips to leisure facilities, shops, or the  
32  
33 113 homes of friends and relatives often represent as much or a greater proportion of all trips traveled by  
34  
35 114 adolescents than school commutes. For example, in Germany, adolescents accumulate on average 2.8  
36  
37 115 trips taking 72 minutes and having a total distance of 29 kilometers per day (33). Of these trips, school  
38  
39 116 commutes account for 35.5% of trips, while 39.5% are made related to leisure activities, 14.5% are  
40  
41 117 related to shopping and everyday activities, and around 4% are made while accompanying adults/parents  
42  
43 118 to other locations. Despite these documented trends, there is a relative dearth of knowledge pertaining  
44  
45 119 to how this variety of daily trips to destinations other than school may contribute to adolescent health  
46  
47 120 representing another important avenue for future study.  
48  
49 121 The dynamics and impacts of parental and adolescent decision-making processes on adolescent active  
50  
51 122 travel is likewise relatively understudied. Perhaps most notably, little is currently known about how the  
52  
53 123 perceived social and physical environment facilitators and barriers to active travel among parents may  
54  
55 124 vary across diverse cohorts from various geographical regions and degrees of urbanization (34, 35).  
56  
57 125 Furthermore, while many previous studies have focused on children, few have addressed active travel  
58  
59  
60

1  
2  
3 126 behavior in adolescents (34). Moreover, previous studies have not considered adolescent active travel  
4  
5 127 behavior in the context of the differing perspectives and attitudes of multiple family members (36, 37)  
6  
7 128 resulting in most existing studies focusing exclusively on either youth or parental perspectives and  
8  
9 129 neglecting the interrelation of both perspectives (38, 39). Such a precedent is an important oversight  
10  
11 130 given that in their comparative study of children and adolescents as well as parental barriers on active  
12  
13 131 commuting to school, Aranda-Balboa et al. (40) found that there are significant differences between  
14  
15 132 adolescents' and parents' perspectives in terms of perceived social and environmental determinants of  
16  
17 133 active travel.

18  
19  
20 134 To better understand and promote adolescent active travel there are a few important research  
21  
22 135 opportunities to address, namely: family environment predictors of adolescent active travel, the value  
23  
24 136 and impact of non-school commuting trips, and the influence of the decision-making processes of  
25  
26 137 adolescents and parents regarding travel behavior. The ARRIVE study (Active tRavel behavioR in the  
27  
28 138 famIlly EnVironmEnt) aims to address these gaps and develop a more comprehensive understanding of  
29  
30 139 adolescent active travel behavior through conducting a theoretically-informed, multi-component, and  
31  
32 140 mixed-methods investigation of German adolescents and parents.

33  
34  
35 141

## 36 37 142 **Methods and analysis**

### 38 39 143 **Study design**

40  
41 144 The ARRIVE study, a mixed-methods cross-sectional study, intends to generate novel insights regarding  
42  
43 145 1) a range of predictors of adolescent active travel by considering trips to four commonly frequented  
44  
45 146 destinations (travel to/from school/workplace, homes of friends and/or relatives, shops, leisure  
46  
47 147 facilities), and 2) the intra-familial dynamics (i.e., family context predictors and decision-making  
48  
49 148 processes) that impact adolescent travel behaviors. ARRIVE's mixed-methods approach includes two  
50  
51 149 complementary studies: quantitative online surveys and qualitative semi-structured interviews. Both  
52  
53 150 studies will collect data from multiple groups, specifically adolescents between 11–15 years old and  
54  
55 151 their parents. Data collection for both studies will take place between June and December 2021.

56  
57  
58 152

### 59 60 153 **Theoretical framework**

1  
2  
3 154 We developed the ARRIVE study based on Panter et al.'s "Conceptual Framework for the  
4  
5 155 Environmental Determinants of Active Travel in Children" (27) (see Figure 1). This framework serves  
6  
7 156 as the study's theoretical foundation as it provides a multi-level outline of the predictors of adolescents'  
8  
9 157 active travel based on the social-ecological model (18, 31). The framework considers physical (e.g.,  
10  
11 158 neighborhood design) and social (e.g., crime) environment factors, as well as individual factors for both  
12  
13 159 parents and youth (e.g., sociodemographic and psychosocial variables, attitudes). In the ARRIVE study,  
14  
15 160 we used these conceptual categories to identify relevant predictors of interest—e.g., personal  
16  
17 161 characteristics, attitudes, parental and adolescent perceptions of physical and social environment  
18  
19 162 barriers—that will be examined in our statistical models in order to explore how they impact the main  
20  
21 163 outcome (adolescent travel behavior) in relation to the four commonly frequented destinations (41-43).  
22  
23  
24 164

25  
26 165 *Figure 1. Theoretical Framework for the ARRIVE study*  
27  
28 166

## 29 30 167 **Quantitative study**

### 31 32 168 *Aims*

33  
34 169 The overarching aim of the quantitative online survey will be to empirically evaluate the theoretical  
35  
36 170 relationships proposed in Panter et al.'s "Conceptual Framework for the Environmental Determinants  
37  
38 171 of Active Travel in Children" (27). To systematically evaluate this theoretical model, our specific aims  
39  
40 172 are threefold. First, we will seek to identify predictors of adolescent travel behavior with respect to four  
41  
42 173 different destinations in order to discern whether the predictive strength of these correlates varies  
43  
44 174 between trip destinations. Second, we will aim to develop a more comprehensive understanding of  
45  
46 175 adolescent transport mode choice in the family context by comparing parent and adolescent perspectives  
47  
48 176 regarding transport mode choice. Third, we will investigate the moderating effects of several  
49  
50 177 theoretically relevant socio-demographic characteristics (e.g., sex/gender, migration background, and  
51  
52 178 degree of urbanization) on adolescent travel behavior.  
53  
54  
55

56 179

### 57 58 180 *Sampling strategy* 59 60

1  
2  
3 181 The survey makes use of an existing nationwide online panel (forsa.omninet) to which access is provided  
4  
5 182 by Forsa, a leading organization for public opinion polls. The recruitment for the survey will be  
6  
7 183 conducted entirely offline via telephone interviews, so as to ensure that those lacking internet access are  
8  
9 184 proportionately represented in the study. The panel contains people living in Germany and is  
10  
11 185 representative of the German population regarding age, sex/gender, education and place of residence.  
12  
13 186 Based on this panel, a sample of adults living together with adolescents aged 11–15 years old will be  
14  
15 187 recruited. The sample will include roughly the same number of mothers and fathers. After giving  
16  
17 188 informed consent to be contacted for the survey, participants will receive an invitation e-mail with a link  
18  
19 189 to the questionnaire.

20  
21  
22 190 As suggested by Bujang et al. (44) for observational studies with large population sizes a minimum  
23  
24 191 sample size of 500 is necessary to derive logistic regression analyses. By using real patient data, it was  
25  
26 192 shown that a minimum sample size of 500 “is able to produce statistics that are nearly representative of  
27  
28 193 the true values in the target population” (44). Thus, equivalent samples of parents (N = 500) and  
29  
30 194 adolescents (N=500) will complete the survey.

31  
32  
33 195

#### 34 196 *Data collection*

35  
36 197 Participants will be able to answer the online questionnaire using one of a tablet, smartphone, or  
37  
38 198 computer. The questionnaire includes two parts: a parent-focused section, and an adolescent-focused  
39  
40 199 section. After answering their portion of the questionnaire, parents will be asked to provide the link to  
41  
42 200 their adolescent or, if there is more than one adolescent in this age group in the family, to one randomly  
43  
44 201 selected adolescent. To this end, parents who have multiple potential participants in their family will be  
45  
46 202 instructed to select the adolescent whose first letter of their first name appears the earliest in the alphabet  
47  
48 203 to fill out the adolescent portion of the survey. The survey is anticipated to take about 15 minutes to  
49  
50 204 complete for adolescents and parents together.

51  
52  
53 205

#### 54 206 *Measures*

55  
56 207 To cover all relevant constructs, an online questionnaire has been developed based on already existing  
57  
58 208 scales (that were partly translated into German), modified scales, and additional single item questions.

1  
2  
3 209 The selection of scales and questions were derived from the central tenets of the theoretical framework;  
4  
5 210 all constructs mentioned in Figure 1 will be assessed via adolescent and parent self-reports. Based on a  
6  
7 211 literature search on activity settings of adolescents, four destinations adolescents frequently visit and  
8  
9 212 which are the most popular places for adolescents in the walkable neighborhood have been selected to  
10  
11 213 assess travel behavior in youth (41, 42, 45, 46). A detailed description of all measures applied in the  
12  
13 214 online questionnaire for parents and adolescents is provided in Table 1.  
14  
15  
16 215

17  
18 216 *Table 1. Overview on Instrument used in the Parental and Adolescent Questionnaire*  
19

20 217

21  
22 218 *Data analysis*

23  
24 219 Descriptive analysis

25  
26 220 Data analysis will include descriptive statistics, an examination of normally distributed data, and  
27  
28 221 examinations of the homogeneity of variance. Descriptive statistics will include means (M) and standard  
29  
30 222 deviations (SD) for continuous variables, and frequencies (%) for categorical variables (e.g., boys and  
31  
32 223 girls and mothers and fathers). Frequency distribution of transport mode for each destination will be  
33  
34 224 calculated separately for boys and girls. To examine internal consistencies of the adapted scales,  
35  
36 225 Cronbach's alpha will be calculated with the respective values indicating excellent > 0.9, good > 0.8,  
37  
38 226 acceptable > 0.7, questionable > 0.6, poor > 0.5, and unacceptable < 0.5 fit (47).  
39  
40

41 227 Outcome measures will consist of a categorical variable representing the different transport modes (e.g.,  
42  
43 228 walking, cycling, driving) per destination, a dichotomous variable (passive vs. active transport mode)  
44  
45 229 for each destination, and an overall score of active transport including all destinations. This overall score  
46  
47 230 will be calculated based on the proportion of active trips in relation to all reported trips resulting in a  
48  
49 231 interval scaled variable with values between 0 (all trips *passive*) to 1 (all trips *active*).

50  
51 232 Differences in transport mode choice and predictor variables between different groups (e.g., age,  
52  
53 233 sex/gender) will be calculated using t-tests and analysis of variance for continuous variables, and chi-  
54  
55 234 squares for categorical variables. For example, differences in transport mode choice between boys and  
56  
57 235 girls and adolescents living in different regions with different degrees of urbanization (cities, medium-  
58  
59 236 sized towns, small towns, rural areas) will be calculated using Pearson-Chi2-test and post-hoc analysis

1  
2  
3 237 (48) as well as the comparison of transport mode across destinations according to parental sex/gender  
4  
5 238 (mothers and fathers). To identify differences in travel distance between transport modes one-way  
6  
7 239 analysis of variance will be calculated.  
8

9 240

11 241 Aim 1: Identifying predictors of adolescent travel behavior

13 242 Multinomial (different transport modes) and binary (active vs. passive travel) logistic regression models  
14  
15 243 controlling for multiple relevant socio-demographic variables will be used to identify predictors of  
16  
17 244 adolescent active travel. Due to the heterogeneity of outcome measures, separate logistic regression  
18  
19 245 analyses will be conducted for each destination using the dichotomous variables of transport mode  
20  
21 246 choice as dependent variable, the individual, social and physical environmental variables as predictors,  
22  
23 247 and socio-demographic factors (e.g., age, education) as confounders. Adjusted odds ratio (aOR) and  
24  
25 248 95%-confidence intervals will be reported. For some analyses, the overall score of active travel will be  
26  
27 249 used as categorical, dependent variable, for example, to assess the effect of the motivational regulations  
28  
29 250 on active travel behavior in adolescents. The regression analysis will either be performed for the whole  
30  
31 251 sample or due to theoretical assumptions separately for male and female adolescents to account for  
32  
33 252 sex/gender differences. To assess associations between travel behavior in adolescents and their parents,  
34  
35 253 separate sex/gender analyses with parent-adolescent-dyads (mother-daughter, mother-son, father-  
36  
37 254 daughter, and father-son) will be conducted by binary logistic regressions.  
38  
39  
40

41 255

43 256 Aim 2: Comparing parental and adolescents' perspectives on transport mode choice

45 257 To investigate parental and adolescents' perspectives on social and physical barriers of active travel,  
46  
47 258 several multiple regression models will be performed. The overall score for transport mode in  
48  
49 259 adolescents will be set as the dependent variable and each barrier as an independent variable. Thus, for  
50  
51 260 each comparable barrier a separate multiple regression will be implemented.  
52

53 261

55 262 Aim 3: Investigating moderating effects of relevant socio-demographic characteristics

57 263 To assess whether the association between the social and physical environment and adolescents' travel  
58  
59 264 behavior are moderated by socio-demographic characteristics (e.g., sex/gender, degree of urbanization),  
60

1  
2  
3 265 we will run 1) logistic regression models controlling for socio-demographic variables, and 2) logistic  
4  
5 266 regression analyses including interactions effects.  
6

7 267  
8  
9 268 If appropriate, further exploratory analysis based on the theoretical framework will be conducted within  
10  
11 269 the ARRIVE project. For all analysis, a level of  $\alpha = 0.05$  will be set as a threshold to determine statistical  
12  
13 270 significance. Analyses will be conducted with R, Matlab, and SPSS.  
14

15  
16 271

## 17 272 **Qualitative study**

### 18 273 *Aims*

19  
20  
21  
22 274 The aim of the qualitative semi-structured interviews will be to develop a deeper understanding of the  
23  
24 275 decision-making processes relevant to adolescent transport mode choice (see Figure 1, grey box).  
25  
26 276 Accordingly, the qualitative interviews will seek to provide a nuanced understanding of transport mode  
27  
28 277 choices by identifying novel concerns, preferences, and values relevant to travel behavior as articulated  
29  
30 278 by the adolescents and parents themselves. To complement our online survey which aims to examine if  
31  
32 279 and how various socio-demographic and socio-environmental factors predict adolescent travel behavior,  
33  
34 280 this qualitative investigation seeks to understand the experiences of adolescent travel behavior by  
35  
36 281 precisely exploring what and why certain influences centrally impact parental and adolescent decision-  
37  
38 282 making processes regarding transport mode choice. Specifically, the qualitative investigation will focus  
39  
40 283 on the following research questions:

- 41  
42  
43 284 - What physical environment and individual factors influence transport mode choice in  
44  
45 285 adolescents?  
46  
47 286 - How do adolescents experience the decision-making process on transport mode choice?  
48  
49 287 - How do parents experience the decision-making process on transport mode choice in  
50  
51 288 adolescents?  
52  
53 289 - Are there any differences in adolescents' and parental perspectives on transport mode choice?  
54  
55

56 290

### 57 291 *Sampling strategy*

1  
2  
3 292 In addition to the online sample, we will also be recruiting another set of adolescents and their parents  
4  
5 293 to take part in the qualitative investigation. These participants will be recruited using theoretical  
6  
7 294 sampling methods (49). Therefore, the sample will not be defined by the onset of the study, but will be  
8  
9 295 selected against the background of theoretical problems outlined earlier and in accordance with our  
10  
11 296 proposed analysis processes. Our sampling methods will thus initially be based on ensuring the samples  
12  
13 297 contain diversity with respect to socio-economic status, migration status, sex/gender, and environmental  
14  
15 298 conditions (e.g., urban and rural living locations). When possible, we will interview both parents to  
16  
17 299 capture the perspectives of fathers and mothers. We anticipate that the final sample will consist of 10–  
18  
19 300 15 adolescents and 15–20 parents.  
20  
21  
22 301

### 23 24 302 *Data collection*

25  
26 303 Interviews will be conducted with adolescent and parent participants separately. Prior to the data  
27  
28 304 collection process all interviewers received formal training from an interview expert. Sample interviews  
29  
30 305 were conducted to ensure the appropriateness of the interview guides.

31  
32 306 Interviews are anticipated to take around 30 minutes to complete. However, because deviations are  
33  
34 307 possible, for each participant an appointment time of 60 minutes will be made. After giving informed  
35  
36 308 consent and agreeing on an appointment, each participant will receive an individual link for an online  
37  
38 309 meeting to conduct the interview. Participants will be able to complete their interview from any desired  
39  
40 310 place so long as they have a stable internet connection and quiet surrounding. Before the start of the  
41  
42 311 recording, the objective and the interview procedure will be explained and participants will be reassured  
43  
44 312 of the voluntary nature of their involvement and their right to refuse to answer any questions. After  
45  
46 313 clarifying any questions that participants may have, the audio recording device will be turned on and the  
47  
48 314 interview will begin. At the end of the interview, the audio recording will stop.  
49  
50  
51 315

### 52 53 316 *Interview Guideline*

54  
55 317 The focus of the interviews for both groups of participants will be the travel behavior of adolescents and  
56  
57 318 the associated decision-making process. During the interviews, adolescents and their parents will be  
58  
59 319 encouraged to recount their travel experiences and their decision-making processes regarding mode

1  
2  
3 320 choice in relation to four different situations. In order to generate a thorough understanding of the  
4  
5 321 differences in decision-making processes when considering the choice of active vs. passive transport to  
6  
7 322 the distinct locations, different interview paths will be followed to ensure that the interview inquires  
8  
9 323 about four (two active, two passive trips) different travel type-location examples (see Figure 2). At the  
10  
11 324 start of each interview parents and adolescents will be instructed to first talk about a recent trip the latter  
12  
13 325 made during one of the days prior to the interview. This first trip may be undertaken by either an active  
14  
15 326 or passive means. Next, and to facilitate a comparison of factors affecting adolescent travel mode  
16  
17 327 decision-making processes, participants will be asked to remember a trip to the same destination that  
18  
19 328 they made using another transport mode (passive/active). To generate additional depth regarding  
20  
21 329 understanding the potential variety of relevant factors influencing participants' decision-making  
22  
23 330 processes, this procedure will be repeated for another destination that the adolescent traveled to in the  
24  
25 331 previous week. In the event that an adolescent participant reports that they never changed transport mode  
26  
27 332 to the two selected destinations, the interviewer will ask about any trips made with the opposite  
28  
29 333 (passive/active) transport mode to explore how their habits and perceptions might be changed.  
30  
31  
32  
33  
34

35 335 *Figure 2. Structure of the interview guide – decision-tree*

36  
37 336  
38  
39 337 When discussing each of the four distinct trips, participants will be asked to describe their experiences  
40  
41 338 of traveling in reference to a series of topics (see Table 2). These topics are grouped into two blocks:  
42  
43 339 the participant's situation at home (i.e., conditions present before the adolescent's trip), and the situation  
44  
45 340 on the journey itself (i.e., social and environmental factors). To garner further information pertaining to  
46  
47 341 the various circumstances which might affect the travel planning process, adolescents and parents will  
48  
49 342 also be asked about a hypothetical commute to school, and specifically what factors (e.g., concerns,  
50  
51 343 priorities) they would foremost consider when planning the trip. Interviews will close with adolescents  
52  
53 344 and parents being asked which transport mode they would prefer and why. More detailed information  
54  
55 345 regarding both interview guides is enclosed in the supplementary materials.  
56  
57  
58  
59

347 *Table 2. Topics addressed in the adolescents and parental interview*

|                                                     | <b>Situation</b>       | <b>Topic</b>            | <b>Examples</b>                                                                   |
|-----------------------------------------------------|------------------------|-------------------------|-----------------------------------------------------------------------------------|
| <b>Active/Passive Transport Mode to Destination</b> | Situation at home      | General aspects         | e.g., weather, stress, behavior, particularities                                  |
|                                                     |                        | Decision-making process | e.g., own behavior, parental behavior, decision on mode choice, rules, motivation |
|                                                     | Situation on the route | Physical environment    | e.g., distance, characteristics of way, like/dislike                              |
|                                                     |                        | Social environment      | e.g., friends, siblings, companionship                                            |
| <b>Hypothetical way to school</b>                   | Situation at home      | Relevant factors        | e.g., weather, school situation, daily schedule                                   |
|                                                     |                        | Decision-making process | e.g., parental influence, motivation, attitudes                                   |

348

349

350 *Data analysis*

351 All audio recordings will be saved, treated as strictly confidential material, and eventually transcribed  
352 verbatim. With regard to answering the four research questions noted earlier, analysis will be conducted  
353 using thematic analysis (50) or content analysis (51). In the first step, two researchers will independently  
354 analyze interview transcripts by the means of a deductive-inductive process. Deductive themes are  
355 defined prior to analysis according to the presented framework (Figure 1) and in this study will include  
356 physical environment factors (e.g., attractiveness, infrastructure, social environment), parent  
357 characteristics and attitudes (e.g., SES, social support), adolescent characteristics and attitudes (e.g.,  
358 age, motivation), and environmental perceptions (e.g., parental perceptions of barriers/enablers,  
359 adolescent perceptions of barriers/enablers). To allow for more in-depth insights in the decision-making  
360 process, researchers will then code transcripts inductively to identify emerging ideas and concepts that  
361 may not align well with the original deductive categories. Subsequently, emerging differences and  
362 commonalities from the deductive-inductive analysis will be discussed together to develop consensus.  
363 In cases where a consensus may not be reached, a third researcher will join the discussion.

364

365 **Ethics and dissemination**

366 The ARRIVE study is designed in accordance with the ethical principles for research involving human  
367 subjects of the Declaration of Helsinki. Ethical approval for the study and its procedures were received  
368 from the ethics commission of the Friedrich-Alexander-University Erlangen-Nuremberg (Reg. 249\_21

1  
2  
3 369 B). Participation in both parts of the study is voluntary. Participants will not receive any reimbursement  
4  
5 370 or compensation for participating in one part of the study. Informed assent will be obtained from all  
6  
7 371 adolescents and informed consent will be obtained from all parents that participate in this study. With  
8  
9 372 regard to the quantitative survey, no personally identifiable information will be included in the data set  
10  
11 373 and transferred from forsa to the study team. In the interviews, participants will not be addressed by  
12  
13 374 name, nor will any personal identifying information be requested. All data will be stored on central  
14  
15 375 servers of the Technical University of Munich/Germany and the University of Erlangen-  
16  
17 376 Nuremberg/Germany.  
18  
19 377 The results of the ARRIVE study will be disseminated through peer-review journal articles, particularly  
20  
21 378 journals with international audiences, and will be presented at academic conferences. Additionally, the  
22  
23 379 results of this study will be disseminated to relevant stakeholders, and policy makers, as well as be made  
24  
25 380 publicly available for interested individuals, families, teachers, and caregivers via a project website and  
26  
27 381 public knowledge translation activities (e.g., public talks, community information sessions).  
28  
29  
30  
31  
32

### 383 **Patient and public involvement statement**

384 No medical patients and/or members of the public were involved in setting the research question nor  
385 they were involved in developing plans for design (or implementation) of this study protocol.  
386

### 387 **Discussion**

388 Increasing physical activity in adolescents is an immediate and serious challenge for modern societies,  
389 but one that if effectively addressed can contribute to preventing a number of chronic and non-  
390 communicable diseases (7). Recent recommendations by the European Society of Cardiology (ESC)  
391 suggest approaches targeting optimizing lifestyle activities to change physical activity behaviors and  
392 reduce sedentary time as important preventive measures in this regard (52). Better understanding the  
393 decision-making processes of both adolescents and parents regarding multiple forms of, and influences  
394 on, daily adolescent active travel behavior can be an effective strategy in supporting these desired  
395 lifestyle activity alterations.

1  
2  
3 396 Until now, only a few qualitative studies exist that provide a deeper understanding of the  
4  
5 397 interrelationships and familial decision-making processes on active travel behavior in adolescents (28,  
6  
7 398 29, 32). The inclusion of qualitative methods in the study of this issue can be beneficial as they may  
8  
9 399 help to capture, re-construct, and comprehend the social reality of groups or individuals as they focus  
10  
11 400 on the experiences, meanings, and perspectives of the participants (53). Additionally, previous evidence  
12  
13 401 has posited that child or adolescent sex/gender plays a significant role with regard to physical activity  
14  
15 402 and travel behavior (54-56), it has been observed that parental perspectives of this issue have been  
16  
17 403 largely limited to the views of mothers (e.g., (29, 57)).

18  
19  
20 404 The ARRIVE study aims to address these research gaps, by providing a comprehensive multi-  
21  
22 405 component and multi-group analysis of the socio-ecological determinants of adolescent active travel  
23  
24 406 behavior and its associated decision-making processes. Quantitative analyses of several theoretically  
25  
26 407 relevant predictors of adolescent active travel are intended to provide the necessary empirical evidence  
27  
28 408 to illustrate the relationships of the family environment with non-school commutes and travel behaviors.  
29  
30 409 Qualitative semi-structured interviews are anticipated to provide deeper insights into the decision  
31  
32 410 making-processes of both adolescents and parents regarding travel mode behaviors. Together, the  
33  
34 411 findings from both components of the ARRIVE study should be of value to both practitioners and  
35  
36 412 researchers as they will offer a comprehensive evaluation of a more diverse set of trips, family  
37  
38 413 predictors, and decision-making processes associated with adolescent active travel, as well as provide  
39  
40 414 empirical evidence to support public health active travel interventions for targeted adolescent groups  
41  
42 415 and families.

43  
44  
45 416 To build on the expected findings of the ARRIVE study in future research, targeted active travel  
46  
47 417 interventions, especially those featuring gamification elements (58), could be a starting point for larger-  
48  
49 418 scale prevention efforts aimed to reduce non-communicable diseases and to improve public health. For  
50  
51 419 example, longitudinal data supports that nine to 18-year-old active commuters have higher levels of  
52  
53 420 physical activity during young adulthood and can maintain these behaviors for up to 12 years (59), thus  
54  
55 421 targeted and gamified early-years interventions may be prudent prevention strategies. Other potential  
56  
57 422 benefits of regular active travel, or targeted interventions, include the improved emotional health and  
58  
59 423 happiness of both adolescents and adults (60), improvements in cardiovascular health (e.g., exercise

1  
2  
3 424 capacity, maximal power, blood pressure and blood parameters) in adults (61-63) and adolescents (64,  
4  
5 425 65), and cleaner and less congested neighbourhoods (66, 67)—all points which future intervention studies  
6  
7 426 could also evaluate alongside the findings (e.g., articulated decision-making processes) of our ARRIVE  
8  
9 427 study.

10 428

11 429

### 12 430 **Authors' contributions**

13 431 AKR, IM, FB, EE, DR, CK and YD made substantial contribution to the concept and design of the  
14 432 ARRIVE study. AKR and IM prepared the first draft of the protocol article and finalized the manuscript.  
15 433 FB, EE, DR, AB, CK and YD made substantial contributions to the manuscript, provided edits to the  
16 434 manuscript and read and approved the final manuscript.

17 435

### 18 436 **Competing interests**

19 437 The authors declare that they have no competing interests.

20 438

### 21 439 **Funding statement**

22 440 This research received no specific grant from any funding agency in the public, commercial or not-for-  
23 441 profit sectors.

24 442

### 25 443 **References:**

26 444

- 27 445 1. WHO. WHO guidelines on physical activity and sedentary behaviour. Geneva: World Health  
28 446 Organization; 2020.
- 29 447 2. Janssen I, LeBlanc AG. Systematic review of the health benefits of physical activity and fitness  
30 448 in school-aged children and youth. *International Journal of Behavioral Nutrition and Physical Activity*.  
31 449 2010;7(1):40.

- 1  
2  
3 450 3. Poitras VJ, Gray CE, Borghese MM, Carson V, Chaput JP, Janssen I, et al. Systematic review  
4  
5 451 of the relationships between objectively measured physical activity and health indicators in school-aged  
6  
7 452 children and youth. *Appl Physiol Nutr Metab*. 2016;41(6 Suppl 3):S197-239.
- 8  
9 453 4. Warburton DE, Charlesworth S, Ivey A, Nettlefold L, Bredin SS. A systematic review of the  
10  
11 454 evidence for Canada's Physical Activity Guidelines for Adults. *International Journal of Behavioral*  
12  
13 455 *Nutrition and Physical Activity*. 2010;7:39-.
- 14  
15 456 5. Guthold R, Stevens GA, Riley LM, Bull FC. Global trends in insufficient physical activity  
16  
17 457 among adolescents: a pooled analysis of 298 population-based surveys with 1.6 million participants.  
18  
19 458 *The Lancet Child & Adolescent Health*. 2019.
- 20  
21 459 6. Guthold R, Stevens GA, Riley LM, Bull FC. Worldwide trends in insufficient physical activity  
22  
23 460 from 2001 to 2016: a pooled analysis of 358 population-based surveys with 1·9 million participants.  
24  
25 461 *The Lancet Global Health*. 2018;6(10):e1077-e86.
- 26  
27 462 7. WHO. Global action plan on physical activity 2018–2030: more active people for a healthier  
28  
29 463 world. Geneva: World Health Organization; 2018.
- 30  
31 464 8. Chillón P, Ortega FB, Ruiz JR, Veidebaum T, Oja L, Mäestu J, et al. Active commuting to  
32  
33 465 school in children and adolescents: An opportunity to increase physical activity and fitness. *Scand J*  
34  
35 466 *Public Health*. 2010;38(8):873-9.
- 36  
37 467 9. Reimers AK, Marzi I, Schmidt SCE, Niessner C, Oriwol D, Worth A, et al. Trends in active  
38  
39 468 commuting to school from 2003 to 2017 among children and adolescents from Germany: the MoMo  
40  
41 469 Study. *Eur J Public Health*. 2021;31(2):373-8.
- 42  
43 470 10. Smith M, Ikeda E, Duncan S, Maddison R, Hinckson E, Meredith-Jones K, et al. Trends and  
44  
45 471 measurement issues for active transportation in New Zealand's physical activity report cards for children  
46  
47 472 and youth. *Journal of Transport & Health*. 2019;15:789-.
- 48  
49 473 11. McDonald NC. Active transportation to school: trends among U.S. schoolchildren, 1969-2001.  
50  
51 474 *Am J Prev Med*. 2007;32(6):509-16.
- 52  
53 475 12. Grize L, Bringolf-Isler B, Martin E, Braun-Fahrlander C. Trend in active transportation to  
54  
55 476 school among Swiss school children and its associated factors: three cross-sectional surveys 1994, 2000  
56  
57 477 and 2005. *Int J Behav Nutr Phys Act*. 2010;7:28.

- 1  
2  
3 478 13. Pavelka J, Sigmundova D, Hamrik Z, Kalman M, Sigmund E, Mathisen F. Trends in Active  
4  
5 479 Commuting to School among Czech Schoolchildren from 2006 to 2014. *Cent Eur J Public Health*.  
6  
7 480 2017;25 Suppl 1:S21-s5.  
8  
9 481 14. Schönbach DMI, Brindley C, Reimers AK, Marques A, Demetriou Y. Socio-Demographic  
10  
11 482 Correlates of Cycling to School among 12-to 15-Year Olds in Southern Germany. *Int J Environ Res*  
12  
13 483 *Public Health*. 2020;17(24):9269.  
14  
15 484 15. Reimers AK, Jekauc D, Peterhans E, Wagner MO, Woll A. Prevalence and socio-demographic  
16  
17 485 correlates of active commuting to school in a nationwide representative sample of German adolescents.  
18  
19 486 *Prev Med*. 2013;56(1):64-9.  
20  
21 487 16. Trang NHHD, Hong TK, Dibley MJ. Active Commuting to School Among Adolescents in Ho  
22  
23 488 Chi Minh City, Vietnam Change and Predictors in a Longitudinal Study, 2004 to 2009. *Am J Prev Med*.  
24  
25 489 2012;42(2):120-8.  
26  
27 490 17. Van Dyck D, De Bourdeaudhuij I, Cardon G, Deforche B. Criterion distances and correlates of  
28  
29 491 active transportation to school in Belgian older adolescents. *Int J Behav Nutr Phys Act*. 2010;7:87.  
30  
31 492 18. Pont K, Ziviani J, Wadley D, Bennett S, Abbott R. Environmental correlates of children's active  
32  
33 493 transportation: A systematic literature review. *Health & Place*. 2009;15(3):849-62.  
34  
35 494 19. Marques A, Peralta M, Sarmento H, Martins J, da Costa FC. Socioeconomic, Personal and  
36  
37 495 Behavioral Correlates of Active Commuting among Adolescents. *Montenegrin Journal of Sports*  
38  
39 496 *Science and Medicine*. 2016;5(1):29-34.  
40  
41 497 20. Martinez-Gomez D, Veiga OL, Gomez-Martinez S, Zapatera B, Calle ME, Marcos A, et al.  
42  
43 498 Behavioural correlates of active commuting to school in Spanish adolescents: the AFINOS (Physical  
44  
45 499 Activity as a Preventive Measure Against Overweight, Obesity, Infections, Allergies, and  
46  
47 500 Cardiovascular Disease Risk Factors in Adolescents) study. *Public Health Nutr*. 2011;14(10):1779-86.  
48  
49 501 21. Yang L, Griffin S, Khaw KT, Wareham N, Panter J. Longitudinal associations between built  
50  
51 502 environment characteristics and changes in active commuting. *BMC Public Health*. 2017;17:8.  
52  
53 503 22. Panter J, Corder K, Griffin SJ, Jones AP, van Sluijs EMF. Individual, socio-cultural and  
54  
55 504 environmental predictors of uptake and maintenance of active commuting in children: longitudinal  
56  
57 505 results from the SPEEDY study. *Int J Behav Nutr Phys Act*. 2013;10:12.

- 1  
2  
3 506 23. Sallis JF, Owen N, Fisher EB. Ecological models of health behavior. In: Glanz K, Rimer BK,  
4  
5 507 Viswanath K, editors. Health behavior and health education: theory, research, and practice. 4th ed. San  
6  
7 508 Francisco, Calif.: Jossey-Bass; 2008.
- 9 509 24. Zaragoza J, Corral A, Ikeda E, García-Bengoechea E, Aibar A. Assessment of psychological,  
10  
11 510 social cognitive and perceived environmental influences on children's active transport to school. Journal  
12  
13 511 of Transport & Health. 2020;16:100839.
- 15 512 25. Pont K, Ziviani J, Wadley D, Abbott R. The Model of Children's Active Travel (M-CAT): a  
16  
17 513 conceptual framework for examining factors influencing children's active travel. Aust Occup Ther J.  
18  
19 514 2011;58(3):138-44.
- 22 515 26. Gotschi T, Kahlmeier S, Castro A, Brand C, Cavill N, Kelly P, et al. Integrated Impact  
23  
24 516 Assessment of Active Travel: Expanding the Scope of the Health Economic Assessment Tool (HEAT)  
25  
26 517 for Walking and Cycling. Int J Environ Res Public Health. 2020;17(20).
- 28 518 27. Panter JR, Jones AP, van Sluijs EM. Environmental determinants of active travel in youth: a  
29  
30 519 review and framework for future research. Int J Behav Nutr Phys Act. 2008;5:34.
- 32 520 28. Faulkner G, Richichi V, Buliung RN, Fusco C, Moola F. What's "quickest and easiest?":  
33  
34 521 parental decision making about school trip mode. International Journal of Behavioral Nutrition and  
35  
36 522 Physical Activity. 2010;7:11.
- 39 523 29. Forsberg H, Rutberg S, Mikaelsson K, Lindqvist AK. It's about being the good parent: exploring  
40  
41 524 attitudes and beliefs towards active school transportation. Int J Circumpolar Health.  
42  
43 525 2020;79(1):1798113.
- 45 526 30. Francis J, Martin K, Wood L, Foster S. 'I'll be driving you to school for the rest of your life': A  
46  
47 527 qualitative study of parents' fear of stranger danger. Journal of Environmental Psychology. 2017;53:112-  
48  
49 528 20.
- 51 529 31. Ikeda E, Hinckson E, Witten K, Smith M. Associations of children's active school travel with  
52  
53 530 perceptions of the physical environment and characteristics of the social environment: A systematic  
54  
55 531 review. Health & Place. 2018;54:118-31.
- 57 532 32. Westman J, Friman M, Olsson LE. What Drives Them to Drive?—Parents' Reasons for  
58  
59 533 Choosing the Car to Take Their Children to School. 2017;8(1970).

- 1  
2  
3 534 33. Nobis C, Kuhnimhof T. *Mobilität in Deutschland – MiD Ergebnisbericht. Studie von infas,*  
4  
5 535 *DLR, IVT und infas 360 im Auftrag des Bundesministers für Verkehr und digitale Infrastruktur (FE-*  
6  
7 536 *Nr. 70.904/15). Bonn, Berlin: [www.mobilitaet-in-deutschland.de](http://www.mobilitaet-in-deutschland.de); 2018.*  
8  
9 537 34. Aranda-Balboa MJ, Huertas-Delgado FJ, Herrador-Colmenero M, Cardon G, Chillón P.  
10  
11 538 *Parental barriers to active transport to school: a systematic review. Int J Public Health. 2019.*  
12  
13 539 35. Lu W, McKyer ELJ, Lee C, Goodson P, Ory MG, Wang S. *Perceived barriers to children's*  
14  
15 540 *active commuting to school: a systematic review of empirical, methodological and theoretical evidence.*  
16  
17 541 *Int J Behav Nutr Phys Act. 2014;11.*  
18  
19 542 36. Niermann CYN, Gerards S, Kremers SPJ. *Conceptualizing Family Influences on Children's*  
20  
21 543 *Energy Balance-Related Behaviors: Levels of Interacting Family Environmental Subsystems (The*  
22  
23 544 *LIFES Framework). Int J Environ Res Public Health. 2018;15(12).*  
24  
25 545 37. Niermann CYN, Kremers SPJ, Renner B, Woll A. *Family Health Climate and Adolescents'*  
26  
27 546 *Physical Activity and Healthy Eating: A Cross-Sectional Study with Mother-Father-Adolescent Triads.*  
28  
29 547 *PLOS ONE. 2015;10(11):e0143599.*  
30  
31 548 38. Tabak I, Mazur J, Nałęcz H. *Family and individual predictors and mediators of adolescent*  
32  
33 549 *physical activity. Health Psychology Report. 2017;4:333-44.*  
34  
35 550 39. Faulkner G, Mitra R, Buliung R, Fusco C, Stone M. *Children's outdoor playtime, physical*  
36  
37 551 *activity, and parental perceptions of the neighbourhood environment. International Journal of Play.*  
38  
39 552 *2015;4(1):84-97.*  
40  
41 553 40. Aranda-Balboa MJ, Chillón P, Saucedo-Araujo RG, Molina-García J, Huertas-Delgado FJ.  
42  
43 554 *Children and Parental Barriers to Active Commuting to School: A Comparison Study. Int J Environ Res*  
44  
45 555 *Public Health. 2021;18(5).*  
46  
47 556 41. Christian HE, Klinker CD, Villanueva K, Knuiman MW, Foster SA, Zubrick SR, et al. *The*  
48  
49 557 *Effect of the Social and Physical Environment on Children's Independent Mobility to Neighborhood*  
50  
51 558 *Destinations. J Phys Act Health. 2015;12 Suppl 1:S84-93.*  
52  
53 559 42. Kyttä M, Oliver M, Ikeda E, Ahmadi E, Omiya I, Laatikainen T. *Children as urbanites: mapping*  
54  
55 560 *the affordances and behavior settings of urban environments for Finnish and Japanese children.*  
56  
57 561 *Children's Geographies. 2018;16(3):319-32.*  
58  
59  
60

- 1  
2  
3 562 43. Veitch J, Carver A, Salmon J, Abbott G, Ball K, Crawford D, et al. What predicts children's  
4  
5 563 active transport and independent mobility in disadvantaged neighborhoods? *Health & Place*.  
6  
7 564 2017;44:103-9.  
8  
9 565 44. Bujang MA, Sa'at N, Sidik T, Joo LC. Sample Size Guidelines for Logistic Regression from  
10  
11 566 Observational Studies with Large Population: Emphasis on the Accuracy Between Statistics and  
12  
13 567 Parameters Based on Real Life Clinical Data. *Malays J Med Sci*. 2018;25(4):122-30.  
14  
15 568 45. Eggs J, Follmer R, Gruschwitz D, Nobis C, Bäumer M, Pfeiffer M. Mobilität in Deutschland -  
16  
17 569 MiD Methodenbericht. Studie vom infas, DLR, IVT und infas 360 im Auftrag des Bundesministers für  
18  
19 570 Verkehr und digitale Infrastruktur. Bonn, Berlin: [www.mobilität-in-deutschland.de](http://www.mobilität-in-deutschland.de); 2018.  
20  
21  
22 571 46. Villanueva K, Giles-Corti B, Bulsara M, Trapp G, Timperio A, McCormack G, et al. Does the  
23  
24 572 walkability of neighbourhoods affect children's independent mobility, independent of parental, socio-  
25  
26 573 cultural and individual factors? *Children's Geographies*. 2014;12(4):393-411.  
27  
28 574 47. Blanz M. *Forschungsmethoden und Statistik für die Soziale Arbeit: Grundlagen und*  
29  
30 575 *Anwendungen*: Kohlhammer Verlag; 2021.  
31  
32 576 48. Beasley T, Schumacker R. Multiple Regression Approach to Analyzing Contingency Tables:  
33  
34 577 Post Hoc and Planned Comparison Procedures. *Journal of Experimental Education - J EXP EDUC*.  
35  
36 578 1995;64:79-93.  
37  
38 579 49. Nagl-Cupal M. Theoretical Sampling. *ProCare*. 2013;18(10):20-2.  
39  
40 580 50. Braun V, Clarke V. Using thematic analysis in psychology. *Qualitative Research in Psychology*.  
41  
42 581 2006;3(2):77-101.  
43  
44 582 51. Mayring P, Fenzl T. Qualitative Inhaltsanalyse. *Handbuch - Methoden der empirischen*  
45  
46 583 *Sozialforschung*: Springer; 2019. p. 633-48.  
47  
48 584 52. Visseren FLJ, Mach F, Smulders YM, Carballo D, Koskinas KC, Bäck M, et al. 2021 ESC  
49  
50 585 Guidelines on cardiovascular disease prevention in clinical practice: Developed by the Task Force for  
51  
52 586 cardiovascular disease prevention in clinical practice with representatives of the European Society of  
53  
54 587 Cardiology and 12 medical societies With the special contribution of the European Association of  
55  
56 588 Preventive Cardiology (EAPC). *Eur Heart J*. 2021;42(34):3227-337.  
57  
58  
59  
60

- 1  
2  
3 589 53. Hammarberg K, Kirkman M, de Lacey S. Qualitative research methods: when to use them and  
4  
5 590 how to judge them. *Hum Reprod.* 2016;31(3):498-501.  
6  
7 591 54. Sigmundova D, Sigmund E, Badura P, Hollein T. Parent-Child Physical Activity Association in  
8  
9 592 Families With 4-to 16-Year-Old Children. *Int J Environ Res Public Health.* 2020;17(11).  
10  
11 593 55. Reimers AK, Boxberger K, Schmidt SCE, Niessner C, Demetriou Y, Marzi I, et al. Social  
12  
13 594 Support and Modelling in Relation to Physical Activity Participation and Outdoor Play in Preschool  
14  
15 595 Children. *Children.* 2019;6(10):115.  
16  
17 596 56. Rodriguez-Rodriguez F, Huertas-Delgado FJ, Barranco-Ruiz Y, Aranda-Balboa MJ, Chillon P.  
18  
19 597 Are the Parents' and Their Children's Physical Activity and Mode of Commuting Associated? Analysis  
20  
21 598 by Gender and Age Group. *Int J Environ Res Public Health.* 2020;17(18).  
22  
23 599 57. Huertas-Delgado FJ, Herrador-Colmenero M, Villa-Gonzalez E, Aranda-Balboa MJ, Caceres  
24  
25 600 MV, Mandic S, et al. Parental perceptions of barriers to active commuting to school in Spanish children  
26  
27 601 and adolescents. *Eur J Public Health.* 2017;27(3):416-21.  
28  
29 602 58. Yen BTH, Mulley C, Burke M. Gamification in transport interventions: Another way to improve  
30  
31 603 travel behavioural change. *Cities.* 2019;85:140-9.  
32  
33 604 59. Yang XL, Telama R, Hirvensalo M, Tammelin T, Viikari JSA, Raitakari OT. Active commuting  
34  
35 605 from youth to adulthood and as a predictor of physical activity in early midlife: The Young Finns Study.  
36  
37 606 *Prev Med.* 2014;59:5-11.  
38  
39 607 60. Ramanathan S, O'Brien C, Faulkner G, Stone M. Happiness in motion: emotions, well-being,  
40  
41 608 and active school travel. *J Sch Health.* 2014;84(8):516-23.  
42  
43 609 61. Schäfer C, Mayr B, Fernandez La Puente de Battre MD, Reich B, Schmied C, Loidl M, et al.  
44  
45 610 Health effects of active commuting to work: The available evidence before GISMO. *Scandinavian*  
46  
47 611 *journal of medicine & science in sports.* 2020;30 Suppl 1(Suppl 1):8-14.  
48  
49 612 62. Mueller N, Rojas-Rueda D, Cole-Hunter T, de Nazelle A, Dons E, Gerike R, et al. Health impact  
50  
51 613 assessment of active transportation: A systematic review. *Prev Med.* 2015;76:103-14.  
52  
53 614 63. Xu HL, Wen LM, Rissel C. The Relationships Between Active Transport to Work or School  
54  
55 615 and Cardiovascular Health or Body Weight: A Systematic Review. *Asia Pac J Public Health.*  
56  
57 616 2013;25(4):298-315.  
58  
59  
60

- 1  
2  
3 617 64. Chillon P, Ortega FB, Ruiz JR, Veidebaum T, Oja L, Maestu J, et al. Active commuting to  
4  
5 618 school in children and adolescents: An opportunity to increase physical activity and fitness. *Scand J*  
6  
7 619 *Public Health*. 2010;38(8):873-9.
- 9 620 65. Lubans DR, Boreham CA, Kelly P, Foster CE. The relationship between active travel to school  
10  
11 621 and health-related fitness in children and adolescents: a systematic review. *Int J Behav Nutr Phys Act*.  
12  
13 622 2011;8:5.
- 15 623 66. Brand C, Dons E, Anaya Boig E, Avila-Palencia I, Clark A, Nazelle A, et al. The climate change  
16  
17 624 mitigation effects of daily active travel in cities. *Transportation Research Part D: Transport and*  
18  
19 625 *Environment*. 2021;93:102764.
- 21 626 67. Giles-Corti B, Foster S, Shilton T, Falconer R. The co-benefits for health of investing in active  
22  
23 627 transportation. *New South Wales Public Health Bulletin*. 2010;21(5-6):122-7.
- 25 628 68. Statistisches Bundesamt. *Statistik und Wirtschaft - Demographische Standards*. Wiesbaden:  
26  
27 629 Statistisches Bundesamt 2016.
- 29 630 69. Behrens K, Böltken F, Dittmar H, Götsche F, Gutfleisch R, Habla H, et al. *Regionale Standards:*  
30  
31 631 *Ausgabe 2019*. Köln 2019.
- 33 632 70. Baumeister SE, Ricci C, Kohler S, Fischer B, Töpfer C, Finger JD, et al. Physical activity  
34  
35 633 surveillance in the European Union: reliability and validity of the European Health Interview Survey-  
36  
37 634 Physical Activity Questionnaire (EHIS-PAQ). *International Journal of Behavioral Nutrition and*  
38  
39 635 *Physical Activity*. 2016;13(1):61.
- 41 636 71. Schmidt SCE, Will N, Henn A, Reimers A, Woll A. *Der Motorik-Modul Aktivitätsfragebogen*  
42  
43 637 *MoMo-AFB : Leitfaden zur Anwendung und Auswertung*. 2016.
- 45 638 72. Huertas-Delgado FJ, Molina-García J, Van Dyck D, Chillon P. A questionnaire to assess  
46  
47 639 parental perception of barriers towards active commuting to school (PABACS): Reliability and validity.  
48  
49 640 *J Transp Health*. 2019;12:97-104.
- 51 641 73. Lu W, McKyer ELJ, Lee C, Ory MG, Goodson P, Wang S. Children's active commuting to  
52  
53 642 school: an interplay of self-efficacy, social economic disadvantage, and environmental characteristics.  
54  
55 643 *International Journal of Behavioral Nutrition and Physical Activity*. 2015;12(1):29.
- 57  
58  
59  
60

- 1  
2  
3 644 74. Fallah Zavareh M, Mehdizadeh M, Nordfjærn T. Active travel as a pro-environmental  
4  
5 645 behaviour: An integrated framework. *Transportation Research Part D: Transport and Environment*.  
6  
7 646 2020;84:102356.  
8  
9 647 75. Dutta-Bergman MJ. Primary sources of health information: comparisons in the domain of health  
10  
11 648 attitudes, health cognitions, and health behaviors. *Health Commun*. 2004;16(3):273-88.  
12  
13 649 76. Jekauc D, Wagner MO, Kahlert D, Woll A. Reliabilität und Validität des MoMo-  
14  
15 650 Aktivitätsfragebogens für Jugendliche (MoMo-AFB). *Diagnostica*. 2013.  
16  
17 651 77. Segura-Diaz JM, Rojas-Jimenez A, Barranco-Ruiz Y, Murillo-Pardo B, Saucedo-Araujo RG,  
18  
19 652 Aranda-Balboa MJ, et al. Feasibility and Reliability of a Questionnaire to Assess the Mode, Frequency,  
20  
21 653 Distance and Time of Commuting to and from School: The PACO Study. *Int J Environ Res Public*  
22  
23 654 *Health*. 2020;17(14).  
24  
25 655 78. Molina-Garcia J, Queralt A, Estevan I, Alvarez O, Castillo I. [Perceived barriers to active  
26  
27 656 commuting to school: reliability and validity of a scale]. *Gac Sanit*. 2016;30(6):426-31.  
28  
29 657 79. Burgueño R, González-Cutre D, Sevil-Serrano J, Herrador-Colmenero M, Segura-Díaz JM,  
30  
31 658 Medina-Casabón J, et al. Psychometric properties of the teachers', parents' and peers' versions of the  
32  
33 659 Perceived Autonomy Support Scale for Active Commuting to and from School (PASS-ACS) in children  
34  
35 660 and adolescents. *Travel Behav Soc*. 2020;20:322-30.  
36  
37 661 80. Burgueño R, González-Cutre D, Sevil-Serrano J, Herrador-Colmenero M, Segura-Díaz JM,  
38  
39 662 Medina-Casabón J, et al. Validation of the Basic Psychological Need Satisfaction in Active  
40  
41 663 Commuting to and from School (BPNS-ACS) Scale in Spanish young people. *J Transp Health*.  
42  
43 664 2020;16:100825.  
44  
45 665 81. Burgueño R, González-Cutre D, Sevil-Serrano J, Herrador-Colmenero M, Segura-Díaz JM,  
46  
47 666 Medina-Casabón J, et al. Understanding the motivational processes involved in adolescents' active  
48  
49 667 commuting behaviour: Development and validation of the Behavioural Regulation in Active  
50  
51 668 Commuting to and from School (BR-ACS) Questionnaire. *Transport Res F-Traf*. 2019;62:615-25.  
52  
53  
54  
55  
56 669  
57  
58 670  
59  
60

1 **Table 1: Overview on Instrument used in the Parental and Adolescent Questionnaire**

| Construct                                   | Instrument                                                                                               | Description                                                                                                                                                                                                                             | Reliability and Validity                                                                                                                                                        |
|---------------------------------------------|----------------------------------------------------------------------------------------------------------|-----------------------------------------------------------------------------------------------------------------------------------------------------------------------------------------------------------------------------------------|---------------------------------------------------------------------------------------------------------------------------------------------------------------------------------|
| <b>Parent questionnaire</b>                 |                                                                                                          |                                                                                                                                                                                                                                         |                                                                                                                                                                                 |
| Parents' and child's socio-demographics     | Demographic Standards (68)                                                                               | Parent indicate their age, gender, migration background, education, employment and how many children under 18 are living in household. For their child, they indicate age, gender and school typ.                                       | -                                                                                                                                                                               |
| BMI (child and parent)                      | Self-reported and proxy-reported weight and height                                                       | Parent report their weight and height as well as their children's weight and height.                                                                                                                                                    | -                                                                                                                                                                               |
| Current situation in school due to COVID-19 | Single-item question                                                                                     | Due to COVID-19 pandemic, an additional question is used to indicate the current schooling situation: normal, home schooling, or alternate lessons.                                                                                     | -                                                                                                                                                                               |
| Degree of urbanization                      | BIK regions (69)                                                                                         | Parents indicate the degree of urbanization in dependence of inhabitants in their hometown (>100,000 inhabitants: city; 20,000–99,999 inhabitants: medium-sized town; 5,000–19,999 inhabitants: small town; <5,000 inhabitants: rural). | -                                                                                                                                                                               |
| Home environment                            | MiD (45)                                                                                                 | Parents indicate car availability and bike availability (parent and child) and if they hold a driver license.                                                                                                                           | -                                                                                                                                                                               |
| Distance to school                          | Single-item question                                                                                     | Parent indicate the distance to their child's school from home in kilometers.                                                                                                                                                           | -                                                                                                                                                                               |
| Aerobic PA guideline compliance             | European Health Interview Survey – Physical Activity Questionnaire (EHIS-PAQ) (Finger et al., 2015)      | Six items are used to indicate parental aerobic PA guideline compliance (at least 150min aerobic PA per week)                                                                                                                           | The EHIS-PAQ is a reliable and valid tool to assess domain-specific PA as shown by adults from Germany (ICC range = 0.43-0.73) (70).                                            |
| Joint physical activity with child          | Modified item from the MoMo-AFB (71)                                                                     | Parents indicate on how many days in a normal week they are more than 60min physically active with their child.                                                                                                                         | -                                                                                                                                                                               |
| Active travel                               | MiD (45)                                                                                                 | To assess active travel in parents, they indicate transport mode, distance, and accompaniment of child to 4 different destinations (work, friends'/relatives' home, shopping, and leisure time activities).                             | -                                                                                                                                                                               |
| Perceived social and physical environment   | Modified version of the Parental Perception of Barriers Towards Active Commuting to School (PABACS) (72) | A 24-item scale is used to assess parental barriers towards active travel including general aspects, barriers for walking and barriers for cycling.                                                                                     | In 207 parents, the questionnaire showed good internal consistency (Cronbach's alpha $\alpha = 0.86$ ), moderate reliability (ICC range: 0.51-0.55) and moderate validity (72). |

|                                            |                                                                                                                      |                                                                                                                                                                                          |                                                                                                                                                                                                                                                                                    |
|--------------------------------------------|----------------------------------------------------------------------------------------------------------------------|------------------------------------------------------------------------------------------------------------------------------------------------------------------------------------------|------------------------------------------------------------------------------------------------------------------------------------------------------------------------------------------------------------------------------------------------------------------------------------|
| Parents' self-efficacy                     | Modified version of the Parents' Self-efficacy Scale (73)                                                            | A 13-item scale is used to assess parents' scheduling self-efficacy, parents' barrier self-efficacy and parents' support-seeking self-efficacy.                                          | Cronbach's $\alpha$ for the three first-order factors parents' scheduling self-efficacy, parents' barrier self-efficacy and parents' support-seeking self-efficacy were 0.95, 0.86, and 0.76, respectively (73).                                                                   |
| Environmental self-identity                | Environmental self-identity scale (74)                                                                               | Parents indicate their agreement to three items on environmental friendliness.                                                                                                           | The scale showed good internal consistency (Cronbach's Alpha $\alpha = 0.870$ ; average corrected item-total correlations = 0.755) (74).                                                                                                                                           |
| Health consciousness                       | Health consciousness scale (75)                                                                                      | Parents indicate their agreement to five items related to health practices on a 5-point-likert scale.                                                                                    | The scale showed good internal consistency (Cronbach's alpha $\alpha = 0.72$ ) (75).                                                                                                                                                                                               |
| <b>Adolescent questionnaire</b>            |                                                                                                                      |                                                                                                                                                                                          |                                                                                                                                                                                                                                                                                    |
| WHO PA guideline compliance                | MoMo-Physical-Activity-Questionnaire for Adolescents (MoMo-AFB) (71)                                                 | Adolescents indicate on how many days in a normal week they are physically active for 60min or more.                                                                                     | In 9-17-year-olds, the MoMo-AFB showed good test-retest reliability (ICC=0.68) and validity (Spearman $r = 0.29$ ) (76).                                                                                                                                                           |
| Active travel                              | MiD (45) and New Version of Mode and Frequency of Commuting To and From School (77)                                  | Adolescents indicate transport mode, accompaniment, and distance (in min and km) to school, to friends/relatives, to shopping opportunities and to leisure time activities.              | The questionnaire is a reliable and feasible tool to assess active travel in adolescents ( $\kappa = 0.61-0.94$ ) (77).                                                                                                                                                            |
| Perceived social and physical environment  | Modified Version of the Barreras percibidas en el desplazamiento activo al centro educativo (BATACE) (78)            | An 18-item scale is used to assess perceived barriers to active travel including environmental and safety factors as well as planning and psychosocial barriers.                         | The BATACE showed good test-retest reliability (ICC range: 0.68-0.77) and internal consistency (Cronbach's alpha $\alpha = 0.59-0.76$ ) in a sample of 465 adolescents (78).                                                                                                       |
| Perceived parental autonomy support for AT | Modified Version of the Perceived Autonomy Support Scale for Active Commuting to and from School (PASS-ACS) (79)     | A 4-item scale assesses perceived parental support for active travel.                                                                                                                    | The PASS-ACS is a valid and reliable (Cronbach's alpha $\alpha = 0.85$ ; ICC = 0.88) tool to assess adolescents' perceived support for active travel (79).                                                                                                                         |
| Basic Psychological Need Satisfaction      | Modified Version of the Basic Psychological Need Satisfaction in Active Commuting to and from School (BPNS-ACS) (80) | A 12-item scale is used to assess adolescents' autonomy, competence, and relatedness need satisfaction with regard to active travel behavior.                                            | In 675 students (10-18 years), the BPNS-ACS showed acceptable internal consistency (autonomy satisfaction $\alpha = 0.81$ , competence satisfaction $\alpha = 0.92$ , and relatedness satisfaction $\alpha = 0.82$ ) and predictive validity (total variance explained: 24%) (80). |
| Motivation for active travel               | Modified version of the Behavioral Regulation in Active Commuting to and from School (BR-ACS) Questionnaire (81)     | A 23-item scale is used to assess motivational regulation in active travel including intrinsic motivation, integrated, identified, introjected and external regulation, and amotivation. | In 404 secondary students, the BR-ACS showed adequate internal consistency (Cronbach's alpha range $\alpha = 0.70-0.91$ ) and stability (ICC=0.74) and predictive validity (total variance explained: 57%) (81).                                                                   |



1  
2  
3  
4  
5  
6  
7  
8  
9  
10  
11  
12  
13  
14  
15  
16  
17  
18  
19  
20  
21  
22  
23  
24  
25  
26  
27  
28  
29  
30  
31  
32  
33  
34  
35  
36  
37  
38  
39  
40  
41  
42  
43  
44  
45  
46

# BMJ Open

**General introduction**  
 What is it like in your family when you have to go somewhere? Is it normal for you to ride your bike or walk? Or do you tend to go by car or bus?

**Start – yesterday's ways**  
 Think about yesterday. Did you go somewhere yesterday? Where did you go or drive?



**Situation 1**

**active way (destination 1)**

**passive way (destination 1)**

**Transition:**  
 Do you remember a day when you did not ride your bike (to school/friends, etc.) or walk, but took the bus or drove in the car? Tell me about it.

**Transition:**  
 Do you remember a day when you did not take the bus or car (to school, etc.) but walked or biked? Tell me about it.

**Situation 2**

**passive way (destination 1)**

**active way (destination 1)**

**Summary**  
 Thinking about your two situations... What was the deciding factor that made you ride your bike/ walk the one time and that made you take the bus/ drive in the car the other time?

**Transition:**  
 Let's go back to yesterday. You told me about the way to ..... How did you get there? (Alternative: Way on another day of the week)

**Situation 3**

**active way (destination 2)**

**passive way (destination 2)**

**Transition:**  
 Do you remember a day when you did not ride your bike (to school/friends, etc.) or walk, but took the bus or drove in the car? Tell me about it.

**Transition:**  
 Do you remember a day when you did not take the bus or car (to school, etc.) but walked or biked? Tell me about it.

**Situation 4**

**passive way (destination 2)**

**active way (destination 2)**

**Summary**  
 Thinking about your two situations... What was the deciding factor that made you ride your bike/ walk the one time and that made you take the bus/ drive in the car the other time?

**Situation 5**

**Fictional way to school**  
 Now think about tomorrow. When you go to school tomorrow, how do you plan to get to school?

**Interview conclusion**  
 If you could choose for yourself, which mode of travel would you like most to use every day, and why?

1  
2  
3  
4  
5  
6  
7  
8  
9  
10  
11  
12  
13  
14  
15  
16  
17  
18  
19  
20  
21  
22  
23  
24  
25  
26  
27  
28  
29  
30  
31  
32  
33  
34  
35  
36  
37  
38  
39  
40  
41  
42  
43  
44  
45  
46

## Supplementary material

### A. Interview guideline - parents

| Interview topic (general)                 | Guiding question                                                                                                                | Interview topic (specific) | Follow-up questions I                                                                                                    | Follow-up questions II                                                          |
|-------------------------------------------|---------------------------------------------------------------------------------------------------------------------------------|----------------------------|--------------------------------------------------------------------------------------------------------------------------|---------------------------------------------------------------------------------|
| <b>Interview guide for situations 1-4</b> |                                                                                                                                 |                            |                                                                                                                          |                                                                                 |
| Way - decision making process             | Think again carefully about the situation before your child left with [mode of travel]. Can you describe the situation at home? | Stress                     | Can you describe the situation at home in detail?                                                                        | Was there anything special about the day?                                       |
|                                           |                                                                                                                                 | Weather                    | What was the weather like?                                                                                               |                                                                                 |
|                                           |                                                                                                                                 | Behavior                   | Can you describe what you did before your child left home?                                                               | How did you feel about it? / How did it make you feel?                          |
|                                           |                                                                                                                                 | Behavior family            | How did you behave? How did your child / siblings behave?                                                                | How did you feel about it?                                                      |
|                                           |                                                                                                                                 | Decision                   | Who decided that your child used [mode of travel]?<br>Can you describe the extent to which you influenced this decision? | Can you describe what was running through your mind when you made the decision? |
|                                           |                                                                                                                                 | Rules                      | Are there any rules in the family regarding [mode of travel]?                                                            | Can you describe why these rules exist / are important to you?                  |
|                                           |                                                                                                                                 | Persuasion/reason          | Can you remember a specific reason why your child used [mode of travel]?                                                 | Is there a personal persuasion behind them?                                     |
|                                           |                                                                                                                                 | Motivation                 | To what extent did you motivate your child to use [mode of travel]?                                                      |                                                                                 |
| Way – physical environment                | Do you know where your child drove/walked along?                                                                                | Parental perspective       | How do you feel about the way?<br>Is there anything on the way that worries you?                                         | How do you deal with it?                                                        |

1  
2  
3  
4  
5  
6  
7  
8  
9  
10  
11  
12  
13  
14  
15  
16  
17  
18  
19  
20  
21  
22  
23  
24  
25  
26  
27  
28  
29  
30  
31  
32  
33  
34  
35  
36  
37  
38  
39  
40  
41  
42  
43  
44  
45  
46

|                                         |                                                                                                                                                                                 |                      |                                                                                                       |                                                                                                          |
|-----------------------------------------|---------------------------------------------------------------------------------------------------------------------------------------------------------------------------------|----------------------|-------------------------------------------------------------------------------------------------------|----------------------------------------------------------------------------------------------------------|
|                                         | Can you describe the way as precisely as possible so that I can get an idea?                                                                                                    | Child's perspective  | How do you think your child likes the way?                                                            | How do you feel about it?                                                                                |
|                                         |                                                                                                                                                                                 | Behavior child – way | Can you describe what your child has done/experienced along the way?                                  |                                                                                                          |
| Way – social environment                | Did someone accompany your child?                                                                                                                                               | Friends company      | How does it happen?                                                                                   | What do you say to that?                                                                                 |
|                                         |                                                                                                                                                                                 | Parents company      | What do you do on the way together? Can you describe why you accompany your child?                    | How is this for you - to use [mode of travel] with your child?                                           |
| <b>Interview guide for situations 5</b> |                                                                                                                                                                                 |                      |                                                                                                       |                                                                                                          |
| Fictional way to school                 | Now please think about tomorrow, when your child goes to school. How do you plan (together with your child) the way to school? Or does your child plan the way to school alone? | Relevant factors     | What factors are you or your child considering for planning tomorrow? What are you thinking about it? | What would change your decision? Are you satisfied with the decision? How do you evaluate this decision? |
|                                         |                                                                                                                                                                                 | Decision             | To what extent do you involve your child?                                                             |                                                                                                          |

1  
2  
3 **B. Interview guideline - youth**  
4

| Interview topic (general)                 | Guiding question                                                                                                                   | Interview topic (specific) | Follow-up questions I                                                                       | Follow-up questions II                                                          |                                                                                                                                                  |
|-------------------------------------------|------------------------------------------------------------------------------------------------------------------------------------|----------------------------|---------------------------------------------------------------------------------------------|---------------------------------------------------------------------------------|--------------------------------------------------------------------------------------------------------------------------------------------------|
| <b>Interview guide for situations 1-4</b> |                                                                                                                                    |                            |                                                                                             |                                                                                 |                                                                                                                                                  |
| Way – decision making process             | Think again exactly about the situation before you [mode of travel]. Can you describe how it came about that you [mode of travel]? | Stress                     | What was the situation like?<br>Was it stressful?                                           | Was there anything special about the day?                                       |                                                                                                                                                  |
|                                           |                                                                                                                                    | Weather                    | What was the weather like?                                                                  |                                                                                 |                                                                                                                                                  |
|                                           |                                                                                                                                    | Behavior                   | What did you do before you left the house?                                                  |                                                                                 |                                                                                                                                                  |
|                                           | Tell me about how all went with your parents.                                                                                      |                            | Behavior family                                                                             | How did you behave? How did your mom/dad/siblings behave?                       | How did you feel at that time?<br>What was running through your mind?                                                                            |
|                                           |                                                                                                                                    |                            | Decision                                                                                    | Who decided that you [mode of travel]?/ How did you decide to [mode of travel]? | How do you feel about that? That you can decide alone / That your parents decide for you? How did you come to your decision to [mode of travel]? |
|                                           |                                                                                                                                    |                            | Rules                                                                                       | Are there any rules in your family?                                             | Do you know why your parents make the decision the way they do?                                                                                  |
|                                           |                                                                                                                                    |                            | Persuasion/reason                                                                           | Was there anything in particular that convinced you to [mode of travel]?        |                                                                                                                                                  |
| Way – physical environment                | Think about where you drove/walked along. Can you describe the way exactly so that I can get an idea of it?                        | Motivation                 | What did motivate you?                                                                      |                                                                                 |                                                                                                                                                  |
|                                           |                                                                                                                                    | Distance                   | How long did you spend on the way?<br>How far is the way?                                   | How do you feel about the way?                                                  |                                                                                                                                                  |
|                                           |                                                                                                                                    | Behavior                   | How did you drive/walk? Do you do anything special on the way?                              | How did you feel while [mode of travel]? How was [mode of travel] for you?      |                                                                                                                                                  |
|                                           |                                                                                                                                    | Way - characteristics      | How did you like the way? What do you like about the way?<br>What do you not like about it? |                                                                                 |                                                                                                                                                  |

1  
2  
3  
4  
5  
6  
7  
8  
9  
10  
11  
12  
13  
14  
15  
16  
17  
18  
19  
20  
21  
22  
23  
24  
25  
26  
27  
28  
29  
30  
31  
32  
33  
34  
35  
36  
37  
38  
39  
40  
41  
42  
43  
44  
45  
46

---

|                          |                                                                                           |         |                                                                                             |                                                                                                                                  |
|--------------------------|-------------------------------------------------------------------------------------------|---------|---------------------------------------------------------------------------------------------|----------------------------------------------------------------------------------------------------------------------------------|
|                          |                                                                                           |         | What did you like about [mode of travel]?                                                   |                                                                                                                                  |
| Way – social environment | Did anyone accompany you on the way? Can you describe the situation on the way in detail? | Company | Can you tell me about how you rode together?<br>Can you tell me what you did along the way? | What was it like between you?<br>Was there anything that you particularly liked?<br>Was there anything you did not like so much? |
|                          |                                                                                           |         | Do you meet other people along the way?                                                     |                                                                                                                                  |

---

**Interview guide for situation 5**

---

|                         |                                                                                                                          |                              |                                                                                                                                                                                                     |                                                                                                                |
|-------------------------|--------------------------------------------------------------------------------------------------------------------------|------------------------------|-----------------------------------------------------------------------------------------------------------------------------------------------------------------------------------------------------|----------------------------------------------------------------------------------------------------------------|
| Fictional way to school | Now think about tomorrow. Can you describe to me how you decide how to get to school? How do you plan the way to school? | Relevant factors<br>Decision | Which factors do you take into account in the planning?<br>What are you considering?<br>Do you check with your parents?<br>Whom do you involve in the decision?<br>How do you come to the decision? | What would change your decision?<br>Are you satisfied with the decision?<br>How do you evaluate this decision? |
|-------------------------|--------------------------------------------------------------------------------------------------------------------------|------------------------------|-----------------------------------------------------------------------------------------------------------------------------------------------------------------------------------------------------|----------------------------------------------------------------------------------------------------------------|

---

# BMJ Open

## Active Travel Behavior in the Family Environment: Protocol for the Mixed-Methods Cross-Sectional ARRIVE Study

|                                 |                                                                                                                                                                                                                                                                                                                                                                                                                                                                                                                                                                                       |
|---------------------------------|---------------------------------------------------------------------------------------------------------------------------------------------------------------------------------------------------------------------------------------------------------------------------------------------------------------------------------------------------------------------------------------------------------------------------------------------------------------------------------------------------------------------------------------------------------------------------------------|
| Journal:                        | <i>BMJ Open</i>                                                                                                                                                                                                                                                                                                                                                                                                                                                                                                                                                                       |
| Manuscript ID                   | bmjopen-2021-056383.R2                                                                                                                                                                                                                                                                                                                                                                                                                                                                                                                                                                |
| Article Type:                   | Protocol                                                                                                                                                                                                                                                                                                                                                                                                                                                                                                                                                                              |
| Date Submitted by the Author:   | 12-Jan-2022                                                                                                                                                                                                                                                                                                                                                                                                                                                                                                                                                                           |
| Complete List of Authors:       | Reimers, Anne; Friedrich-Alexander-Universitat Erlangen-Nurnberg, Department of Sport Science and Sport<br>Marzi, Isabel; Friedrich-Alexander University Erlangen-Nuremberg, Department of Sport Sciene and Sport<br>Beck, Franziska; Friedrich-Alexander-Universitat Erlangen-Nurnberg, Sport Science and Sport<br>Engels, Eliane ; Friedrich-Alexander-Universitat Erlangen-Nurnberg<br>Renninger, Denise; Technical University of Munich<br>Buttazoni, Adrian; University of Waterloo<br>Krieger, Claus; Universität Hamburg<br>Demetriou, Yolanda; Technical University of Munich |
| <b>Primary Subject Heading</b>: | Public health                                                                                                                                                                                                                                                                                                                                                                                                                                                                                                                                                                         |
| Secondary Subject Heading:      | Sports and exercise medicine                                                                                                                                                                                                                                                                                                                                                                                                                                                                                                                                                          |
| Keywords:                       | SPORTS MEDICINE, SOCIAL MEDICINE, PUBLIC HEALTH                                                                                                                                                                                                                                                                                                                                                                                                                                                                                                                                       |
|                                 |                                                                                                                                                                                                                                                                                                                                                                                                                                                                                                                                                                                       |

SCHOLARONE™  
Manuscripts

1  
2  
3 1 **Active Travel Behavior in the Family Environment: Protocol for the Mixed-Methods**

4  
5 2 **Cross-Sectional ARRIVE Study**

6  
7 3  
8  
9 4 Anne K. Reimers<sup>1#\*</sup>, Isabel Marzi<sup>1#</sup>, Franziska Beck<sup>1</sup>, Eliane Engels<sup>1</sup>, Denise Renninger<sup>2</sup>, Adrian  
10 5 Buttazzoni<sup>3</sup>, Claus Krieger<sup>4</sup>, & Yolanda Demetriou<sup>2</sup>

11  
12 6 <sup>1</sup>Department of Sport Science and Sport, Friedrich-Alexander-University Erlangen-Nuremberg,  
13 7 Gebbertstr. 123b, 91058 Erlangen, Germany

14  
15 8 <sup>2</sup>Department of Sport and Health Sciences, Technical University of Munich, Georg-Brauchle-Ring 60,  
16 9 80992 Munich, Germany

17  
18 10 <sup>3</sup>School of Planning, Faculty of Environment, University of Waterloo, Waterloo, ON, Canada

19  
20 11 <sup>4</sup>Faculty of Education, Movement, Games and Sports Education, Universität Hamburg, Von-Melle-Park  
21 12 8, 20146 Hamburg, Germany

22  
23 13  
24  
25 14 Submitted to: *BMJ open (Protocol)*

26  
27 15 # Shared first authorship

28  
29 16 \*Corresponding Author:

30  
31 17 Anne Reimers

32  
33 18 Anne.reimers@fau.de

34  
35 19

1  
2  
3 **Abstract:**  
4

5 **Introduction:** Active travel is an important source of physical activity and a primary contributor to  
6  
7 overall health among adolescents. To understand and promote active travel behavior in adolescents,  
8  
9 developing a more robust understanding of the predictors of active travel and its associated decision-  
10  
11 making processes is needed. Situated within a theoretical socio-ecological framework for adolescent  
12  
13 travel behavior, the mixed-methods ARRIVE study aims to quantitatively assess the influence of several  
14  
15 predictors of adolescent travel behavior, and to qualitatively understand the associated decision-making  
16  
17 processes of both adolescents and parents.  
18  
19

20 **Methods and analysis:** Our mixed-methods approach will feature online surveys and semi-structured  
21  
22 interviews. The online questionnaire, developed in accordance with a theoretical framework of  
23  
24 adolescent active travel, will examine adolescent travel behavior with respect to four different  
25  
26 destinations while controlling for multiple relevant individual, social, and physical environment factors.  
27  
28 To enable the comparison of adolescent and parental perspectives, the questionnaire will be answered  
29  
30 by a representative sample of German adolescents (11–15 years old) and their parents.  
31  
32 Our semi-structured interviews, likewise framed based on the central tenets of the theoretical framework  
33  
34 of adolescent active travel, will seek to explore the decision-making process of families regarding travel  
35  
36 mode choice via conducting interviews with each member (i.e., father, mother, adolescent). To  
37  
38 investigate travel decision-making processes, adolescents and their parents will be invited to talk about  
39  
40 trips they undertook using both active and passive transport modes during the last week. Thematic  
41  
42 analyses will be conducted to highlight the central concerns, priorities, and values of participants'  
43  
44 decision-making processes.  
45  
46

47 **Ethics and dissemination:** This study has received ethical approval from the ethics commission of the  
48  
49 Friedrich-Alexander-University Erlangen-Nuremberg. Study results will be disseminated at scientific  
50  
51 conferences and published in peer-reviewed journals. Additionally, study findings will be made publicly  
52  
53 available to relevant health, policy, and research stakeholders and groups.  
54  
55

56  
57  
58  
59  
60

## 46 **Strength and limitations of this study**

### 47 **Bullet points:**

- 48 • The quantitative part of the ARRIVE study includes a large representative sample of German  
49 parents and adolescents from diverse neighborhoods and regions and different socio-economic  
50 backgrounds. However, the sample might not be representative of typical German travel  
51 behaviors as they result from many additional factors like urban infrastructure accessibility,  
52 family work arrangements, and other socio-demographic factors (e.g., vehicle ownership) that  
53 we aren't able to control for in this study.
- 54 • Situated within a theoretical socio-ecological framework, multiple theoretically relevant  
55 predictors of adolescent active travel behavior and different modes of transport to four distinct  
56 destinations will be assessed.
- 57 • Reliable and valid tools in the form of online surveys, which were developed based on the  
58 central tenets of a theoretical socio-ecological framework of adolescent active travel, will be  
59 used to assess adolescent active travel behavior and its predictors.
- 60 • Semi-structured interviews will seek to generate a novel and nuanced understanding of the  
61 familial decision-making processes regarding transport mode choices from both parental and  
62 adolescent perspectives.
- 63 • Limitations include the cross-sectional design, self-report survey data, and a lack of objectively  
64 measured physical environment characteristics.

### 66 **Keywords (3–10):**

67 Active commuting, active transport, fathers, mothers, family, mixed-methods, framework, interview,  
68 online questionnaire

69

## 70 **Introduction**

71 Regular physical activity is an important source of overall health, can decrease the risk of non-  
72 communicable diseases, and is linked to improved mental health (1). Long-term health benefits of  
73 physical activity are well documented for children, adolescents (2, 3), and adults (4). However,  
74 concerning low levels of physical activity among children, adolescent (5), and adults (6) in countries  
75 across the globe demands urgent action. The World Health Organization (WHO) has observed that  
76 current efforts to reduce global inactivity rates have been largely ineffective, and that more innovative  
77 and comprehensive approaches to promote physical activity are needed (7).

78 Active travel, that is any form of human-powered transportation (e.g., walking, biking), as a daily routine  
79 (e.g., trips to/from school) is a low-cost and widely accessible source of physical activity (8). But despite  
80 many potential benefits of active commuting, percentages of active commuters have declined in most  
81 countries (9-13). In Germany, like in many other countries, for example, only a significant minority of  
82 adolescents currently walk or cycle to school (9, 14-16). Recent nationwide data from the German  
83 MoMo Study showed that 17.7% of adolescent girls and 20.2% of adolescent boys regularly walk to  
84 school, while 21.5% of girls and 25.2% of boys cycle to school (9).

85 To better understand adolescent travel mode decisions and travel behavior, as well as to enable the  
86 development of evidence-based intervention programs that promote active travel in adolescents, a more  
87 comprehensive analysis of the predictors of adolescent active travel and decision-making processes is  
88 warranted. At present, cross-sectional (17-20) and longitudinal (16, 21, 22) research has identified  
89 various individual- and neighborhood-level factors related to adolescent active travel. However, while  
90 these studies and extant theoretical socio-ecological models (23) and active travel frameworks (24-27)  
91 have outlined that adolescent active travel is a multi-level phenomenon, little is known about the  
92 influence of family-level predictors of adolescent active travel behavior, the decision-making processes  
93 within the family, and especially about adolescent travel behavior to non-school destinations.

94 One comparatively understudied influence of potential consequence regarding adolescent active travel  
95 behavior is family environment predictors (e.g., parental support, role modelling, availability of a  
96 bicycle). Although recent study confirms the importance of parental controls with respect to adolescent  
97 transport mode choice (28-30), comprehensive studies of family environment predictors of adolescent

1  
2  
3 98 active commuting remain rather limited (31). To date, studies have largely focused on examining only  
4  
5 99 singular elements of the family-level. For example, recent works have found safety aspects in terms of  
6  
7 100 traffic safety and a child's own ability to travel safely and independently strongly influence parental  
8  
9 101 decision making on transport mode (28, 29, 32), and that some parents prefer car usage to spend time  
10  
11 102 with their children (32). Other noted relevant factors in this regard include social norms and convenience  
12  
13 103 (28, 32), and parenting practices (29) as significant individual predictors. In other cases, however, family  
14  
15 104 environment influences are ambiguous. When examining the role of distance to school and its interaction  
16  
17 105 with family-level factors, existing evidence is inconclusive: while one Swedish study (32) revealed that  
18  
19 106 parents chauffeured their teenagers to school regardless of distance, another from Canada (28) found  
20  
21 107 that transport mode choice was influenced by perceptions of travel time and distance to school.  
22  
23 108 Ultimately, given this combination of a lack of comprehensive investigations and uncertainty in other  
24  
25 109 areas, there is a need to more comprehensively (e.g., examine the interaction of parent and adolescent  
26  
27 110 perceptions) consider family environment influences of adolescent active travel.  
28  
29 111 Similarly, while existing literature has focused significantly on active travel to/ from school, only a few  
30  
31 112 studies have considered other highly frequented destinations. Trips to leisure facilities, shops, or the  
32  
33 113 homes of friends and relatives often represent as much or a greater proportion of all trips traveled by  
34  
35 114 adolescents than school commutes. For example, in Germany, adolescents accumulate on average 2.8  
36  
37 115 trips taking 72 minutes and having a total distance of 29 kilometers per day (33). Of these trips, school  
38  
39 116 commutes account for 35.5% of trips, while 39.5% are made related to leisure activities, 14.5% are  
40  
41 117 related to shopping and everyday activities, and around 4% are made while accompanying adults/parents  
42  
43 118 to other locations. Despite these documented trends, there is a relative dearth of knowledge pertaining  
44  
45 119 to how this variety of daily trips to destinations other than school may contribute to adolescent health  
46  
47 120 representing another important avenue for future study.  
48  
49 121 The dynamics and impacts of parental and adolescent decision-making processes on adolescent active  
50  
51 122 travel is likewise relatively understudied. Perhaps most notably, little is currently known about how the  
52  
53 123 perceived social and physical environment facilitators and barriers to active travel among parents may  
54  
55 124 vary across diverse cohorts from various geographical regions and degrees of urbanization (34, 35).  
56  
57 125 Furthermore, while many previous studies have focused on children, few have addressed active travel  
58  
59  
60

1  
2  
3 126 behavior in adolescents (34). Moreover, previous studies have not considered adolescent active travel  
4  
5 127 behavior in the context of the differing perspectives and attitudes of multiple family members (36, 37)  
6  
7 128 resulting in most existing studies focusing exclusively on either youth or parental perspectives and  
8  
9 129 neglecting the interrelation of both perspectives (38, 39). Such a precedent is an important oversight  
10  
11 130 given that in their comparative study of children and adolescents as well as parental barriers on active  
12  
13 131 commuting to school, Aranda-Balboa et al. (40) found that there are significant differences between  
14  
15 132 adolescents' and parents' perspectives in terms of perceived social and environmental determinants of  
16  
17 133 active travel.

18  
19  
20 134 To better understand and promote adolescent active travel there are a few important research  
21  
22 135 opportunities to address, namely: family environment predictors of adolescent active travel, the value  
23  
24 136 and impact of non-school commuting trips, and the influence of the decision-making processes of  
25  
26 137 adolescents and parents regarding travel behavior. The ARRIVE study (Active tRavel behavioR in the  
27  
28 138 famIlly EnVironmEnt) aims to address these gaps and develop a more comprehensive understanding of  
29  
30 139 adolescent active travel behavior through conducting a theoretically-informed, multi-component, and  
31  
32 140 mixed-methods investigation of German adolescents and parents.

33  
34  
35 141

## 36 37 142 **Methods and analysis**

### 38 39 143 **Study design**

40  
41 144 The ARRIVE study, a mixed-methods cross-sectional study, intends to generate novel insights regarding  
42  
43 145 1) a range of predictors of adolescent active travel by considering trips to four commonly frequented  
44  
45 146 destinations (travel to/from school/workplace, homes of friends and/or relatives, shops, leisure  
46  
47 147 facilities), and 2) the intra-familial dynamics (i.e., family context predictors and decision-making  
48  
49 148 processes) that impact adolescent travel behaviors. ARRIVE's mixed-methods approach includes two  
50  
51 149 complementary studies: quantitative online surveys and qualitative semi-structured interviews. Both  
52  
53 150 studies will collect data from multiple groups, specifically adolescents between 11–15 years old and  
54  
55 151 their parents. Data collection for both studies will take place between June and December 2021.

56  
57  
58 152

### 59 60 153 **Theoretical framework**

1  
2  
3 154 We developed the ARRIVE study based on Panter et al.'s "Conceptual Framework for the  
4  
5 155 Environmental Determinants of Active Travel in Children" (27) (see Figure 1). This framework serves  
6  
7 156 as the study's theoretical foundation as it provides a multi-level outline of the predictors of adolescents'  
8  
9 157 active travel based on the social-ecological model (18, 31). The framework considers physical (e.g.,  
10  
11 158 neighborhood design) and social (e.g., crime) environment factors, as well as individual factors for both  
12  
13 159 parents and youth (e.g., socio-demographic and psychosocial variables, attitudes). In the ARRIVE study,  
14  
15 160 we used these conceptual categories to identify relevant predictors of interest—e.g., personal  
16  
17 161 characteristics, attitudes, parental and adolescent perceptions of physical and social environment  
18  
19 162 barriers—that will be examined in our statistical models in order to explore how they impact the main  
20  
21 163 outcome (adolescent travel behavior) in relation to the four commonly frequented destinations (41-43).  
22  
23  
24 164

25  
26 165 *Figure 1. Theoretical Framework for the ARRIVE study*  
27  
28 166

## 29 30 167 **Quantitative study**

### 31 32 168 *Aims*

33  
34 169 The overarching aim of the quantitative online survey will be to empirically evaluate the theoretical  
35  
36 170 relationships proposed in Panter et al.'s "Conceptual Framework for the Environmental Determinants  
37  
38 171 of Active Travel in Children" (27). In a first step, we will comprehensively describe travel behavior in  
39  
40 172 adolescents from Germany in dependence of destination and adolescents' socio-demographic  
41  
42 173 characteristics. To systematically evaluate this theoretical model, our specific aims are threefold. First,  
43  
44 174 we will seek to identify predictors of adolescent travel behavior with respect to four different  
45  
46 175 destinations in order to discern whether the predictive strength of these correlates varies between trip  
47  
48 176 destinations. Second, we will aim to develop a more comprehensive understanding of adolescent  
49  
50 177 transport mode choice in the family context by comparing parent and adolescent perspectives regarding  
51  
52 178 transport mode choice. Third, we will investigate the moderating effects of several theoretically relevant  
53  
54 179 socio-demographic characteristics (e.g., sex/gender, migration background, and degree of urbanization)  
55  
56 180 on adolescent travel behavior.  
57  
58 181

### 182 *Sampling strategy*

183 The survey makes use of an existing nationwide online panel (forsa.omninet) to which access is provided  
184 by Forsa, a leading organization for public opinion polls. The recruitment for the survey will be  
185 conducted entirely offline via telephone interviews, so as to ensure that those lacking internet access are  
186 proportionately represented in the study. The panel contains people living in Germany and is  
187 representative of the German population regarding age, sex/gender, education and place of residence.  
188 Based on this panel, a sample of adults living together with adolescents aged 11–15 years old will be  
189 recruited. The sample will include roughly the same number of mothers and fathers. After giving  
190 informed consent to be contacted for the survey, participants will receive an invitation e-mail with a link  
191 to the questionnaire.

192 As suggested by Bujang et al. (44) for observational studies with large population sizes a minimum  
193 sample size of 500 is necessary to derive logistic regression analyses. By using real patient data, it was  
194 shown that a minimum sample size of 500 “is able to produce statistics that are nearly representative of  
195 the true values in the target population” (44). Thus, equivalent samples of parents (N = 500) and  
196 adolescents (N=500) will complete the survey.

### 198 *Data collection*

199 Participants will be able to answer the online questionnaire using one of a tablet, smartphone, or  
200 computer. The questionnaire includes two parts: a parent-focused section, and an adolescent-focused  
201 section. After answering their portion of the questionnaire, parents will be asked to provide the link to  
202 their adolescent or, if there is more than one adolescent in this age group in the family, to one randomly  
203 selected adolescent. To this end, parents who have multiple potential participants in their family will be  
204 instructed to select the adolescent whose first letter of their first name appears the earliest in the alphabet  
205 to fill out the adolescent portion of the survey. The survey is anticipated to take about 15 minutes to  
206 complete for adolescents and parents together.

### 208 *Measures*

1  
2  
3 209 To cover all relevant constructs, an online questionnaire has been developed based on already existing  
4  
5 210 scales (that were partly translated into German), modified scales, and additional single item questions.  
6  
7 211 The selection of scales and questions were derived from the central tenets of the theoretical framework;  
8  
9 212 all constructs mentioned in Figure 1 will be assessed via adolescent and parent self-reports. Based on a  
10  
11 213 literature search on activity settings of adolescents, four destinations adolescents frequently visit and  
12  
13 214 which are the most popular places for adolescents in the walkable neighborhood have been selected to  
14  
15 215 assess travel behavior in youth (41, 42, 45, 46). A detailed description of all measures applied in the  
16  
17 216 online questionnaire for parents and adolescents is provided in Table 1.  
18  
19  
20 217

### 21 218 *Data analysis*

#### 22 219 Descriptive analysis

23  
24 220 Data analysis will include descriptive statistics, an examination of normally distributed data, and  
25  
26 221 examinations of the homogeneity of variance. Descriptive statistics will include means (M) and standard  
27  
28 222 deviations (SD) for continuous variables, and frequencies (%) for categorical variables (e.g., boys and  
29  
30 223 girls and mothers and fathers). Frequency distribution of transport mode for each destination will be  
31  
32 224 calculated separately for boys and girls. To examine internal consistencies of the adapted scales,  
33  
34 225 Cronbach's alpha will be calculated with the respective values indicating excellent > 0.9, good > 0.8,  
35  
36 226 acceptable > 0.7, questionable > 0.6, poor > 0.5, and unacceptable < 0.5 fit (47).  
37  
38  
39 227

40  
41 228 Outcome measures will consist of a categorical variable representing the different transport modes (e.g.,  
42  
43 229 walking, cycling, driving) per destination, a dichotomous variable (passive vs. active transport mode)  
44  
45 230 for each destination, and an overall score of active transport including all destinations. This overall score  
46  
47 231 will be calculated based on the proportion of active trips in relation to all reported trips resulting in an  
48  
49 interval scaled variable with values between 0 (all trips *passive*) to 1 (all trips *active*).  
50  
51  
52  
53  
54  
55  
56  
57  
58  
59  
60

232 **Table 1: Overview on Instrument used in the Parental and Adolescent Questionnaire**

| Construct                                   | Instrument                                                                                               | Description                                                                                                                                                                                                                             | Reliability and Validity                                                                                                                                   |
|---------------------------------------------|----------------------------------------------------------------------------------------------------------|-----------------------------------------------------------------------------------------------------------------------------------------------------------------------------------------------------------------------------------------|------------------------------------------------------------------------------------------------------------------------------------------------------------|
| <b>Parent questionnaire</b>                 |                                                                                                          |                                                                                                                                                                                                                                         |                                                                                                                                                            |
| Parents' and child's socio-demographics     | Demographic Standards (48)                                                                               | Parent indicate their age, gender, migration background, education, employment and how many children under 18 are living in household. For their child, they indicate age, gender and school typ.                                       | -                                                                                                                                                          |
| Body Mass Index (BMI; child and parent)     | Self-reported and proxy-reported weight and height                                                       | Parent report their weight and height as well as their children's weight and height.                                                                                                                                                    |                                                                                                                                                            |
| Current situation in school due to COVID-19 | Single-item question                                                                                     | Due to COVID-19 pandemic, an additional question is used to indicate the current schooling situation: normal, home schooling, or alternate lessons.                                                                                     | -                                                                                                                                                          |
| Degree of urbanization                      | BIK regions (49)                                                                                         | Parents indicate the degree of urbanization in dependence of inhabitants in their hometown (>100,000 inhabitants: city; 20,000–99,999 inhabitants: medium-sized town; 5,000–19,999 inhabitants: small town; <5,000 inhabitants: rural). | -                                                                                                                                                          |
| Home environment                            | Mobilität in Deutschland (MiD) (45)                                                                      | Parents indicate car availability and bike availability (parent and child) and if they hold a driver license.                                                                                                                           | -                                                                                                                                                          |
| Distance to school                          | Single-item question                                                                                     | Parent indicate the distance to their child's school from home in kilometers.                                                                                                                                                           | -                                                                                                                                                          |
| Aerobic PA guideline compliance             | European Health Interview Survey – Physical Activity Questionnaire (EHIS-PAQ) (Finger et al., 2015)      | Six items are used to indicate parental aerobic PA guideline compliance (at least 150min aerobic PA per week)                                                                                                                           | The EHIS-PAQ is a reliable and valid tool to assess domain-specific PA as shown by adults from Germany (ICC = 0.43-0.73) (50).                             |
| Joint physical activity with child          | Modified item from the MoMo-Physical-Activity-Questionnaire (MoMo-AFB) (51)                              | Parents indicate on how many days in a normal week they are more than 60min physically active with their child.                                                                                                                         | -                                                                                                                                                          |
| Active travel                               | Mobilität in Deutschland (MiD) (45)                                                                      | To assess active travel in parents, they indicate transport mode, distance, and accompaniment of child to four different destinations (work, friends'/relatives' home, shopping, and leisure time activities).                          | -                                                                                                                                                          |
| Perceived social and physical environment   | Modified version of the Parental Perception of Barriers Towards Active Commuting to School (PABACS) (52) | A 24-item scale is used to assess parental barriers towards active travel including general aspects, barriers for walking and barriers for cycling.                                                                                     | In 207 parents, the questionnaire showed good internal consistency ( $\alpha = 0.86$ ), moderate reliability (ICC = 0.51-0.55) and moderate validity (52). |

|                                              |                                                                                                                      |                                                                                                                                                                                          |                                                                                                                                                                                                                                                                                    |
|----------------------------------------------|----------------------------------------------------------------------------------------------------------------------|------------------------------------------------------------------------------------------------------------------------------------------------------------------------------------------|------------------------------------------------------------------------------------------------------------------------------------------------------------------------------------------------------------------------------------------------------------------------------------|
| Parents' self-efficacy                       | Modified version of the Parents' Self-efficacy Scale (53)                                                            | A 13-item scale is used to assess parents' scheduling self-efficacy, parents' barrier self-efficacy and parents' support-seeking self-efficacy.                                          | Cronbach's $\alpha$ for the three first-order factors parents' scheduling self-efficacy, parents' barrier self-efficacy and parents' support-seeking self-efficacy were 0.95, 0.86, and 0.76, respectively (53).                                                                   |
| Environmental self-identity                  | Environmental Self-identity Scale (54)                                                                               | Parents indicate their agreement to three items on environmental friendliness.                                                                                                           | The scale showed good internal consistency ( $\alpha = 0.870$ ; average corrected item-total correlations = 0.755) (54).                                                                                                                                                           |
| Health consciousness                         | Health Consciousness Scale (55)                                                                                      | Parents indicate their agreement to five items related to health practices on a 5-point-likert scale.                                                                                    | The scale showed good internal consistency ( $\alpha = 0.72$ ) (55).                                                                                                                                                                                                               |
| <b>Adolescent questionnaire</b>              |                                                                                                                      |                                                                                                                                                                                          |                                                                                                                                                                                                                                                                                    |
| WHO PA guideline compliance                  | MoMo-Physical-Activity-Questionnaire for Adolescents (MoMo-AFB) (51)                                                 | Adolescents indicate on how many days in a normal week they are physically active for 60min or more.                                                                                     | In 9-17-year-olds, the MoMo-AFB showed good test-retest reliability (ICC=0.68) and validity (Spearman $r = 0.29$ ) (56).                                                                                                                                                           |
| Active travel                                | MiD (45) and New Version of Mode and Frequency of Commuting To and From School (57)                                  | Adolescents indicate transport mode, accompaniment, and distance (in min and km) to school, to friends/relatives, to shopping opportunities and to leisure time activities.              | The questionnaire is a reliable and feasible tool to assess active travel in adolescents ( $\kappa = 0.61-0.94$ ) (57).                                                                                                                                                            |
| Perceived social and physical environment    | Modified Version of the Barreras percibidas en el desplazamiento activo al centro educativo (BATACE) (58)            | An 18-item scale is used to assess perceived barriers to active travel including environmental and safety factors as well as planning and psychosocial barriers.                         | The BATACE showed good test-retest reliability (ICC range: 0.68-0.77) and internal consistency ( $\alpha = 0.59-0.76$ ) in a sample of 465 adolescents (58).                                                                                                                       |
| Perceived parental support for active travel | Modified Version of the Perceived Autonomy Support Scale for Active Commuting to and from School (PASS-ACS) (59)     | A 4-item scale assesses perceived parental support for active travel.                                                                                                                    | The PASS-ACS is a valid and reliable ( $\alpha = 0.85$ ; ICC = 0.88) tool to assess adolescents' perceived support for active travel (59).                                                                                                                                         |
| Basic Psychological Need Satisfaction        | Modified Version of the Basic Psychological Need Satisfaction in Active Commuting to and from School (BPNS-ACS) (60) | A 12-item scale is used to assess adolescents' autonomy, competence, and relatedness need satisfaction with regard to active travel behavior.                                            | In 675 students (10-18 years), the BPNS-ACS showed acceptable internal consistency (autonomy satisfaction $\alpha = 0.81$ , competence satisfaction $\alpha = 0.92$ , and relatedness satisfaction $\alpha = 0.82$ ) and predictive validity (total variance explained: 24%) (60). |
| Motivation for active travel                 | Modified version of the Behavioral Regulation in Active Commuting to and from School (BR-ACS) Questionnaire (61)     | A 23-item scale is used to assess motivational regulation in active travel including intrinsic motivation, integrated, identified, introjected and external regulation, and amotivation. | In 404 secondary students, the BR-ACS showed adequate internal consistency ( $\alpha = 0.70-0.91$ ) and stability (ICC=0.74) and predictive validity (total variance explained: 57%) (61).                                                                                         |

233 Notes: Cronbach's  $\alpha = \alpha$ ; ICC= intraclass correlation coefficient;  $\kappa =$  Cohen's Kappa; min=  
234 minutes; PA= physical activity

1  
2  
3 235 Aim 1: Description of travel behavior in adolescents from Germany  
4

5 236 Differences in transport mode choice and predictor variables between different groups (e.g., age,  
6  
7 237 sex/gender) will be calculated using t-tests and analysis of variance for continuous variables, and chi-  
8  
9 238 squares for categorical variables. For example, differences in transport mode choice between boys and  
10  
11 239 girls and adolescents living in different regions with different degrees of urbanization (cities, medium-  
12  
13 240 sized towns, small towns, rural areas) will be calculated using Pearson-Chi2-test and post-hoc analysis  
14  
15 241 (62) as well as the comparison of transport mode across destinations according to parental sex/gender  
16  
17 242 (mothers and fathers). To identify differences in travel distance between transport modes one-way  
18  
19 243 analysis of variance will be calculated.  
20  
21

22 244

23  
24 245 Aim 2: Identifying predictors of adolescent travel behavior  
25

26 246 Multinomial (different transport modes) and binary (active vs. passive travel) logistic regression models  
27  
28 247 controlling for multiple relevant socio-demographic variables will be used to identify predictors of  
29  
30 248 adolescent active travel. Due to the heterogeneity of outcome measures, separate logistic regression  
31  
32 249 analyses will be conducted for each destination using the dichotomous variables of transport mode  
33  
34 250 choice as dependent variable, the individual, social and physical environmental variables as predictors.  
35  
36 251 In all analyses, socio-demographic factors (e.g., age, education) will be included as confounders.  
37  
38 252 Adjusted odds ratio (aOR) and 95%-confidence intervals will be reported. For some analyses, the overall  
39  
40 253 score of active travel will be used as categorical, dependent variable, for example, to assess the effect of  
41  
42 254 the motivational regulations on active travel behavior in adolescents. The regression analysis will either  
43  
44 255 be performed for the whole sample or due to theoretical assumptions separately for male and female  
45  
46 256 adolescents to account for sex/gender differences. To assess associations between travel behavior in  
47  
48 257 adolescents and their parents, separate sex/gender analyses with parent-adolescent-dyads (mother-  
49  
50 258 daughter, mother-son, father-daughter, and father-son) will be conducted by binary logistic regressions,  
51  
52 259 with adolescents' travel behavior as the outcome and parental travel modes as the predictors.  
53  
54

55 260

56  
57  
58 261 Aim 3: Comparing parental and adolescents' perspectives on transport mode choice  
59  
60

1  
2  
3 262 To investigate parental and adolescents' perspectives on social and physical barriers of active travel,  
4  
5 263 several multiple regression models will be performed. The overall score for transport mode in  
6  
7 264 adolescents will be set as the dependent variable and each barrier as an independent variable. Thus, for  
8  
9 265 each comparable barrier a separate multiple regression will be implemented.  
10

11  
12 266

13  
14 267 **Aim 4: Investigating moderating effects of relevant socio-demographic characteristics**

15  
16 268 To assess whether the association between the social and physical environment and adolescents' travel  
17  
18 269 behavior are moderated by socio-demographic characteristics (e.g., sex/gender, degree of urbanization),  
19  
20 270 we will run 1) logistic regression models controlling for socio-demographic variables, and 2) logistic  
21  
22 271 regression analyses including interactions effects.  
23

24 272

25  
26 273 If appropriate, further exploratory analysis based on the theoretical framework will be conducted within  
27  
28 274 the ARRIVE project. For all analysis, a level of  $\alpha = 0.05$  will be set as a threshold to determine statistical  
29  
30 275 significance. Analyses will be conducted with R, Matlab, and SPSS.  
31

32 276

### 33 34 277 **Qualitative study**

#### 35 36 278 *Aims*

37  
38  
39 279 The aim of the qualitative semi-structured interviews will be to develop a deeper understanding of the  
40  
41 280 decision-making processes relevant to adolescent transport mode choice (see Figure 1, grey box).

42  
43 281 Accordingly, the qualitative interviews will seek to provide a nuanced understanding of transport mode  
44  
45 282 choices by identifying novel concerns, preferences, and values relevant to travel behavior as articulated  
46  
47 283 by the adolescents and parents themselves. To complement our online survey which aims to examine if  
48  
49 284 and how various socio-demographic and socio-environmental factors predict adolescent travel behavior,  
50  
51 285 this qualitative investigation seeks to understand the experiences of adolescent travel behavior by  
52  
53 286 precisely exploring what and why certain influences centrally impact parental and adolescent decision-  
54  
55 287 making processes regarding transport mode choice. Specifically, the qualitative investigation will focus  
56  
57 288 on the following research questions:  
58  
59  
60

- 1  
2  
3 289 - What physical environment and individual factors influence transport mode choice in  
4  
5 290 adolescents?  
6  
7 291 - How do adolescents experience the decision-making process on transport mode choice?  
8  
9 292 - How do parents experience the decision-making process on transport mode choice in  
10  
11 293 adolescents?  
12  
13 294 - Are there any differences in adolescents' and parental perspectives on transport mode choice?  
14  
15  
16 295

17  
18 296 *Sampling strategy*

19  
20 297 In addition to the online sample, we will also be recruiting another set of adolescents and their parents  
21  
22 298 to take part in the qualitative investigation. These participants will be recruited using theoretical  
23  
24 299 sampling methods (63). Therefore, the sample will not be defined by the onset of the study, but will be  
25  
26 300 selected against the background of theoretical problems outlined earlier and in accordance with our  
27  
28 301 proposed analysis processes. Our sampling methods will thus initially be based on ensuring the samples  
29  
30 302 contain diversity with respect to socio-economic status, migration status, sex/gender, and environmental  
31  
32 303 conditions (e.g., urban and rural living locations). When possible, we will interview both parents to  
33  
34 304 capture the perspectives of fathers and mothers. We anticipate that the final sample will consist of 10–  
35  
36 305 15 adolescents and 15–20 parents.  
37  
38

39 306  
40  
41 307 *Data collection*

42  
43 308 Interviews will be conducted with adolescent and parent participants separately. Prior to the data  
44  
45 309 collection process all interviewers received formal training from an interview expert. Sample interviews  
46  
47 310 were conducted to ensure the appropriateness of the interview guides.

48  
49 311 Interviews are anticipated to take around 30 minutes to complete. However, because deviations are  
50  
51 312 possible, for each participant an appointment time of 60 minutes will be made. After giving informed  
52  
53 313 consent and agreeing on an appointment, each participant will receive an individual link for an online  
54  
55 314 meeting to conduct the interview. Participants will be able to complete their interview from any desired  
56  
57 315 place so long as they have a stable internet connection and quiet surrounding. Before the start of the  
58  
59 316 recording, the objective and the interview procedure will be explained and participants will be reassured

1  
2  
3 317 of the voluntary nature of their involvement and their right to refuse to answer any questions. After  
4  
5 318 clarifying any questions that participants may have, the audio recording device will be turned on and the  
6  
7 319 interview will begin. At the end of the interview, the audio recording will stop.  
8

9 320

### 11 321 *Interview Guideline*

13 322 The focus of the interviews for both groups of participants will be the travel behavior of adolescents and  
14  
15 323 the associated decision-making process. During the interviews, adolescents and their parents will be  
16  
17 324 encouraged to recount their travel experiences and their decision-making processes regarding mode  
18  
19 325 choice in relation to four different situations. In order to generate a thorough understanding of the  
20  
21 326 differences in decision-making processes when considering the choice of active vs. passive transport to  
22  
23 327 the distinct locations, different interview paths will be followed to ensure that the interview inquires  
24  
25 328 about four (two active, two passive trips) different travel type-location examples (see Figure 2). At the  
26  
27 329 start of each interview parents and adolescents will be instructed to first talk about a recent trip the latter  
28  
29 330 made during one of the days prior to the interview. This first trip may be undertaken by either an active  
30  
31 331 or passive means. Next, and to facilitate a comparison of factors affecting adolescent travel mode  
32  
33 332 decision-making processes, participants will be asked to remember a trip to the same destination that  
34  
35 333 they made using another transport mode (passive/active). To generate additional depth regarding  
36  
37 334 understanding the potential variety of relevant factors influencing participants' decision-making  
38  
39 335 processes, this procedure will be repeated for another destination that the adolescent traveled to in the  
40  
41 336 previous week. In the event that an adolescent participant reports that they never changed transport mode  
42  
43 337 to the two selected destinations, the interviewer will ask about any trips made with the opposite  
44  
45 338 (passive/active) transport mode to explore how their habits and perceptions might be changed.  
46  
47  
48

49 339

### 51 340 *Figure 2. Structure of the interview guide – decision-tree*

53 341

55 342 When discussing each of the four distinct trips, participants will be asked to describe their experiences  
56  
57 343 of traveling in reference to a series of topics (see Table 2). These topics are grouped into two blocks:  
58  
59 344 the participant's situation at home (i.e., conditions present before the adolescent's trip), and the situation  
60

on the journey itself (i.e., social and environmental factors). To garner further information pertaining to the various circumstances which might affect the travel planning process, adolescents and parents will also be asked about a hypothetical commute to school, and specifically what factors (e.g., concerns, priorities) they would foremost consider when planning the trip. Interviews will close with adolescents and parents being asked which transport mode they would prefer and why. More detailed information regarding both interview guides is enclosed in the supplementary materials.

351

352 *Table 2. Topics addressed in the adolescents and parental interview*

|                                                     | Situation              | Topic                   | Examples                                                                          |
|-----------------------------------------------------|------------------------|-------------------------|-----------------------------------------------------------------------------------|
| <b>Active/Passive Transport Mode to Destination</b> | Situation at home      | General aspects         | e.g., weather, stress, behavior, particularities                                  |
|                                                     |                        | Decision-making process | e.g., own behavior, parental behavior, decision on mode choice, rules, motivation |
|                                                     | Situation on the route | Physical environment    | e.g., distance, characteristics of way, like/dislike                              |
|                                                     |                        | Social environment      | e.g., friends, siblings, companionship                                            |
| <b>Hypothetical way to school</b>                   | Situation at home      | Relevant factors        | e.g., weather, school situation, daily schedule                                   |
|                                                     |                        | Decision-making process | e.g., parental influence, motivation, attitudes                                   |

353

354

### 355 *Data analysis*

356 All audio recordings will be saved, treated as strictly confidential material, and eventually transcribed  
 357 verbatim. With regard to answering the four research questions noted earlier, analysis will be conducted  
 358 using thematic analysis (64) or content analysis (65). In the first step, two researchers will independently  
 359 analyze interview transcripts by the means of a deductive-inductive process. Deductive themes are  
 360 defined prior to analysis according to the presented framework (Figure 1) and in this study will include  
 361 physical environment factors (e.g., attractiveness, infrastructure, social environment), parent  
 362 characteristics and attitudes (e.g., SES, social support), adolescent characteristics and attitudes (e.g.,  
 363 age, motivation), and environmental perceptions (e.g., parental perceptions of barriers/enablers,  
 364 adolescent perceptions of barriers/enablers). To allow for more in-depth insights in the decision-making  
 365 process, researchers will then code transcripts inductively to identify emerging ideas and concepts that

1  
2  
3 366 may not align well with the original deductive categories. Subsequently, emerging differences and  
4  
5 367 commonalities from the deductive-inductive analysis will be discussed together to develop consensus.  
6  
7 368 In cases where a consensus may not be reached, a third researcher will join the discussion.  
8  
9 369

### 11 370 **Ethics and dissemination**

13 371 The ARRIVE study is designed in accordance with the ethical principles for research involving human  
14  
15 372 subjects of the Declaration of Helsinki. Ethical approval for the study and its procedures were received  
16  
17 373 from the ethics commission of the Friedrich-Alexander-University Erlangen-Nuremberg (Reg. 249\_21  
18  
19 374 B). Participation in both parts of the study is voluntary. Participants will not receive any reimbursement  
20  
21 375 or compensation for participating in one part of the study. Informed assent will be obtained from all  
22  
23 376 adolescents and informed consent will be obtained from all parents that participate in this study. With  
24  
25 377 regard to the quantitative survey, no personally identifiable information will be included in the data set  
26  
27 378 and transferred from forsa to the study team. In the interviews, participants will not be addressed by  
28  
29 379 name, nor will any personal identifying information be requested. All data will be stored on central  
30  
31 380 servers of the Technical University of Munich/Germany and the University of Erlangen-  
32  
33 381 Nuremberg/Germany.

34  
35  
36 382 The results of the ARRIVE study will be disseminated through peer-review journal articles, particularly  
37  
38 383 journals with international audiences, and will be presented at academic conferences. Additionally, the  
39  
40 384 results of this study will be disseminated to relevant stakeholders, and policy makers, as well as be made  
41  
42 385 publicly available for interested individuals, families, teachers, and caregivers via a project website and  
43  
44 386 public knowledge translation activities (e.g., public talks, community information sessions).  
45  
46  
47 387

### 49 388 **Patient and public involvement statement**

51 389 No medical patients and/or members of the public were involved in setting the research question nor  
52  
53 390 they were involved in developing plans for design (or implementation) of this study protocol.  
54  
55

56 391

### 58 392 **Discussion**

1  
2  
3 393 Increasing physical activity in adolescents is an immediate and serious challenge for modern societies,  
4  
5 394 but one that if effectively addressed can contribute to preventing a number of chronic and non-  
6  
7 395 communicable diseases (7). Recent recommendations by the European Society of Cardiology (ESC)  
8  
9 396 suggest approaches targeting optimizing lifestyle activities to change physical activity behaviors and  
10  
11 397 reduce sedentary time as important preventive measures in this regard (66). Better understanding the  
12  
13 398 decision-making processes of both adolescents and parents regarding multiple forms of, and influences  
14  
15 399 on, daily adolescent active travel behavior can be an effective strategy in supporting these desired  
16  
17 400 lifestyle activity alterations.

18  
19  
20 401 Until now, only a few qualitative studies exist that provide a deeper understanding of the  
21  
22 402 interrelationships and familial decision-making processes on active travel behavior in adolescents (28,  
23  
24 403 29, 32). The inclusion of qualitative methods in the study of this issue can be beneficial as they may  
25  
26 404 help to capture, re-construct, and comprehend the social reality of groups or individuals as they focus  
27  
28 405 on the experiences, meanings, and perspectives of the participants (67). Additionally, previous evidence  
29  
30 406 has posited that child or adolescent sex/gender plays a significant role with regard to physical activity  
31  
32 407 and travel behavior (68-70), it has been observed that parental perspectives of this issue have been  
33  
34 408 largely limited to the views of mothers (e.g., (29, 71)).

35  
36  
37 409 The ARRIVE study aims to address these research gaps, by providing a comprehensive multi-  
38  
39 410 component and multi-group analysis of the socio-ecological determinants of adolescent active travel  
40  
41 411 behavior and its associated decision-making processes. Quantitative analyses of several theoretically  
42  
43 412 relevant predictors of adolescent active travel are intended to provide the necessary empirical evidence  
44  
45 413 to illustrate the relationships of the family environment with non-school commutes and travel behaviors.  
46  
47 414 Qualitative semi-structured interviews are anticipated to provide deeper insights into the decision  
48  
49 415 making-processes of both adolescents and parents regarding travel mode behaviors. Together, the  
50  
51 416 findings from both components of the ARRIVE study should be of value to both practitioners and  
52  
53 417 researchers as they will offer a comprehensive evaluation of a more diverse set of trips, family  
54  
55 418 predictors, and decision-making processes associated with adolescent active travel, as well as provide  
56  
57 419 empirical evidence to support public health active travel interventions for targeted adolescent groups  
58  
59 420 and families.

1  
2  
3 421 To build on the expected findings of the ARRIVE study in future research, targeted active travel  
4  
5 422 interventions, especially those featuring gamification elements (72), could be a starting point for larger-  
6  
7 423 scale prevention efforts aimed to reduce non-communicable diseases and to improve public health. For  
8  
9 424 example, longitudinal data supports that nine to 18-year-old active commuters have higher levels of  
10  
11 425 physical activity during young adulthood and can maintain these behaviors for up to 12 years (73), thus  
12  
13 426 targeted and gamified early-years interventions may be prudent prevention strategies. Other potential  
14  
15 427 benefits of regular active travel, or targeted interventions, include the improved emotional health and  
16  
17 428 happiness of both adolescents and adults (74), improvements in cardiovascular health (e.g., exercise  
18  
19 429 capacity, maximal power, blood pressure and blood parameters) in adults (75-77) and adolescents (78,  
20  
21 430 79), and cleaner and less congested neighbourhoods (80, 81)—all points which future intervention studies  
22  
23 431 could also evaluate alongside the findings (e.g., articulated decision-making processes) of our ARRIVE  
24  
25 432 study.  
26  
27  
28  
29  
30  
31  
32

### 33 **Authors' contributions**

34  
35 436 AKR, IM, FB, EE, DR, CK and YD made substantial contribution to the concept and design of the  
36  
37 437 ARRIVE study. AKR and IM prepared the first draft of the protocol article and finalized the manuscript.  
38  
39 438 FB, EE, DR, AB, CK and YD made substantial contributions to the manuscript, provided edits to the  
40  
41 439 manuscript and read and approved the final manuscript.  
42  
43  
44

### 45 441 **Competing interests**

46  
47 442 The authors declare that they have no competing interests.  
48  
49  
50  
51

### 52 444 **Funding statement**

53  
54 445 This research received no specific grant from any funding agency in the public, commercial or not-for-  
55  
56 446 profit sectors.  
57  
58  
59

### 60 448 **References:**

- 1  
2  
3 449  
4  
5 450 1. WHO. WHO guidelines on physical activity and sedentary behaviour. Geneva: World Health  
6  
7 451 Organization; 2020.  
8  
9 452 2. Janssen I, LeBlanc AG. Systematic review of the health benefits of physical activity and fitness  
10  
11 453 in school-aged children and youth. *International Journal of Behavioral Nutrition and Physical Activity*.  
12  
13 454 2010;7(1):40.  
14  
15 455 3. Poitras VJ, Gray CE, Borghese MM, Carson V, Chaput JP, Janssen I, et al. Systematic review  
16  
17 456 of the relationships between objectively measured physical activity and health indicators in school-aged  
18  
19 457 children and youth. *Appl Physiol Nutr Metab*. 2016;41(6 Suppl 3):S197-239.  
20  
21  
22 458 4. Warburton DE, Charlesworth S, Ivey A, Nettlefold L, Bredin SS. A systematic review of the  
23  
24 459 evidence for Canada's Physical Activity Guidelines for Adults. *International Journal of Behavioral*  
25  
26 460 *Nutrition and Physical Activity*. 2010;7:39-.  
27  
28 461 5. Guthold R, Stevens GA, Riley LM, Bull FC. Global trends in insufficient physical activity  
29  
30 462 among adolescents: a pooled analysis of 298 population-based surveys with 1.6 million participants.  
31  
32 463 *The Lancet Child & Adolescent Health*. 2019.  
33  
34 464 6. Guthold R, Stevens GA, Riley LM, Bull FC. Worldwide trends in insufficient physical activity  
35  
36 465 from 2001 to 2016: a pooled analysis of 358 population-based surveys with 1.9 million participants.  
37  
38 466 *The Lancet Global Health*. 2018;6(10):e1077-e86.  
39  
40  
41 467 7. WHO. Global action plan on physical activity 2018–2030: more active people for a healthier  
42  
43 468 world. Geneva: World Health Organization; 2018.  
44  
45 469 8. Chillón P, Ortega FB, Ruiz JR, Veidebaum T, Oja L, Mäestu J, et al. Active commuting to  
46  
47 470 school in children and adolescents: An opportunity to increase physical activity and fitness. *Scand J*  
48  
49 471 *Public Health*. 2010;38(8):873-9.  
50  
51 472 9. Reimers AK, Marzi I, Schmidt SCE, Niessner C, Oriwol D, Worth A, et al. Trends in active  
52  
53 473 commuting to school from 2003 to 2017 among children and adolescents from Germany: the MoMo  
54  
55 474 Study. *Eur J Public Health*. 2021;31(2):373-8.  
56  
57  
58  
59  
60

- 1  
2  
3 475 10. Smith M, Ikeda E, Duncan S, Maddison R, Hinckson E, Meredith-Jones K, et al. Trends and  
4  
5 476 measurement issues for active transportation in New Zealand's physical activity report cards for children  
6  
7 477 and youth. *Journal of Transport & Health*. 2019;15:789-.
- 8  
9 478 11. McDonald NC. Active transportation to school: trends among U.S. schoolchildren, 1969-2001.  
10  
11 479 *Am J Prev Med*. 2007;32(6):509-16.
- 12  
13 480 12. Grize L, Bringolf-Isler B, Martin E, Braun-Fahrlander C. Trend in active transportation to  
14  
15 481 school among Swiss school children and its associated factors: three cross-sectional surveys 1994, 2000  
16  
17 482 and 2005. *Int J Behav Nutr Phys Act*. 2010;7:28.
- 18  
19 483 13. Pavelka J, Sigmundova D, Hamrik Z, Kalman M, Sigmund E, Mathisen F. Trends in Active  
20  
21 484 Commuting to School among Czech Schoolchildren from 2006 to 2014. *Cent Eur J Public Health*.  
22  
23 485 2017;25 Suppl 1:S21-s5.
- 24  
25 486 14. Schönbach DMI, Brindley C, Reimers AK, Marques A, Demetriou Y. Socio-Demographic  
26  
27 487 Correlates of Cycling to School among 12-to 15-Year Olds in Southern Germany. *Int J Environ Res*  
28  
29 488 *Public Health*. 2020;17(24):9269.
- 30  
31 489 15. Reimers AK, Jekauc D, Peterhans E, Wagner MO, Woll A. Prevalence and socio-demographic  
32  
33 490 correlates of active commuting to school in a nationwide representative sample of German adolescents.  
34  
35 491 *Prev Med*. 2013;56(1):64-9.
- 36  
37 492 16. Trang NHHD, Hong TK, Dibley MJ. Active Commuting to School Among Adolescents in Ho  
38  
39 493 Chi Minh City, Vietnam Change and Predictors in a Longitudinal Study, 2004 to 2009. *Am J Prev Med*.  
40  
41 494 2012;42(2):120-8.
- 42  
43 495 17. Van Dyck D, De Bourdeaudhuij I, Cardon G, Deforche B. Criterion distances and correlates of  
44  
45 496 active transportation to school in Belgian older adolescents. *Int J Behav Nutr Phys Act*. 2010;7:87.
- 46  
47 497 18. Pont K, Ziviani J, Wadley D, Bennett S, Abbott R. Environmental correlates of children's active  
48  
49 498 transportation: A systematic literature review. *Health & Place*. 2009;15(3):849-62.
- 50  
51 499 19. Marques A, Peralta M, Sarmento H, Martins J, da Costa FC. Socioeconomic, Personal and  
52  
53 500 Behavioral Correlates of Active Commuting among Adolescents. *Montenegrin Journal of Sports*  
54  
55 501 *Science and Medicine*. 2016;5(1):29-34.
- 56  
57  
58  
59  
60

- 1  
2  
3 502 20. Martinez-Gomez D, Veiga OL, Gomez-Martinez S, Zapatera B, Calle ME, Marcos A, et al.  
4  
5 503 Behavioural correlates of active commuting to school in Spanish adolescents: the AFINOS (Physical  
6  
7 504 Activity as a Preventive Measure Against Overweight, Obesity, Infections, Allergies, and  
8  
9 505 Cardiovascular Disease Risk Factors in Adolescents) study. *Public Health Nutr.* 2011;14(10):1779-86.  
10  
11 506 21. Yang L, Griffin S, Khaw KT, Wareham N, Panter J. Longitudinal associations between built  
12  
13 507 environment characteristics and changes in active commuting. *BMC Public Health.* 2017;17:8.  
14  
15 508 22. Panter J, Corder K, Griffin SJ, Jones AP, van Sluijs EMF. Individual, socio-cultural and  
16  
17 509 environmental predictors of uptake and maintenance of active commuting in children: longitudinal  
18  
19 510 results from the SPEEDY study. *Int J Behav Nutr Phys Act.* 2013;10:12.  
20  
21 511 23. Sallis JF, Owen N, Fisher EB. Ecological models of health behavior. In: Glanz K, Rimer BK,  
22  
23 512 Viswanath K, editors. *Health behavior and health education: theory, research, and practice.* 4th ed. San  
24  
25 513 Francisco, Calif.: Jossey-Bass; 2008.  
26  
27 514 24. Zaragoza J, Corral A, Ikeda E, García-Bengoechea E, Aibar A. Assessment of psychological,  
28  
29 515 social cognitive and perceived environmental influences on children's active transport to school. *Journal*  
30  
31 516 *of Transport & Health.* 2020;16:100839.  
32  
33 517 25. Pont K, Ziviani J, Wadley D, Abbott R. The Model of Children's Active Travel (M-CAT): a  
34  
35 518 conceptual framework for examining factors influencing children's active travel. *Aust Occup Ther J.*  
36  
37 519 2011;58(3):138-44.  
38  
39 520 26. Gotschi T, Kahlmeier S, Castro A, Brand C, Cavill N, Kelly P, et al. Integrated Impact  
40  
41 521 Assessment of Active Travel: Expanding the Scope of the Health Economic Assessment Tool (HEAT)  
42  
43 522 for Walking and Cycling. *Int J Environ Res Public Health.* 2020;17(20).  
44  
45 523 27. Panter JR, Jones AP, van Sluijs EM. Environmental determinants of active travel in youth: a  
46  
47 524 review and framework for future research. *Int J Behav Nutr Phys Act.* 2008;5:34.  
48  
49 525 28. Faulkner G, Richichi V, Buliung RN, Fusco C, Moola F. What's "quickest and easiest?":  
50  
51 526 parental decision making about school trip mode. *International Journal of Behavioral Nutrition and*  
52  
53 527 *Physical Activity.* 2010;7:11.  
54  
55  
56  
57  
58  
59  
60

- 1  
2  
3 528 29. Forsberg H, Rutberg S, Mikaelsson K, Lindqvist AK. It's about being the good parent: exploring  
4  
5 529 attitudes and beliefs towards active school transportation. *Int J Circumpolar Health*.  
6  
7 530 2020;79(1):1798113.  
8  
9 531 30. Francis J, Martin K, Wood L, Foster S. 'I'll be driving you to school for the rest of your life': A  
10  
11 532 qualitative study of parents' fear of stranger danger. *Journal of Environmental Psychology*. 2017;53:112-  
12  
13 533 20.  
14  
15 534 31. Ikeda E, Hinckson E, Witten K, Smith M. Associations of children's active school travel with  
16  
17 535 perceptions of the physical environment and characteristics of the social environment: A systematic  
18  
19 536 review. *Health & Place*. 2018;54:118-31.  
20  
21  
22 537 32. Westman J, Friman M, Olsson LE. What Drives Them to Drive?—Parents' Reasons for  
23  
24 538 Choosing the Car to Take Their Children to School. 2017;8(1970).  
25  
26 539 33. Nobis C, Kuhnimhof T. *Mobilität in Deutschland – MiD Ergebnisbericht*. Studie von infas,  
27  
28 540 DLR, IVT und infas 360 im Auftrag des Bundesministers für Verkehr und digitale Infrastruktur (FE-  
29  
30 541 Nr. 70.904/15). Bonn, Berlin: [www.mobilitaet-in-deutschland.de](http://www.mobilitaet-in-deutschland.de); 2018.  
31  
32 542 34. Aranda-Balboa MJ, Huertas-Delgado FJ, Herrador-Colmenero M, Cardon G, Chillón P.  
33  
34 543 Parental barriers to active transport to school: a systematic review. *Int J Public Health*. 2019.  
35  
36 544 35. Lu W, McKyer ELJ, Lee C, Goodson P, Ory MG, Wang S. Perceived barriers to children's  
37  
38 545 active commuting to school: a systematic review of empirical, methodological and theoretical evidence.  
39  
40 546 *Int J Behav Nutr Phys Act*. 2014;11.  
41  
42 547 36. Niermann CYN, Gerards S, Kremers SPJ. Conceptualizing Family Influences on Children's  
43  
44 548 Energy Balance-Related Behaviors: Levels of Interacting Family Environmental Subsystems (The  
45  
46 549 LIFES Framework). *Int J Environ Res Public Health*. 2018;15(12).  
47  
48 550 37. Niermann CYN, Kremers SPJ, Renner B, Woll A. Family Health Climate and Adolescents'  
49  
50 551 Physical Activity and Healthy Eating: A Cross-Sectional Study with Mother-Father-Adolescent Triads.  
51  
52 552 *PLOS ONE*. 2015;10(11):e0143599.  
53  
54 553 38. Tabak I, Mazur J, Nałęcz H. Family and individual predictors and mediators of adolescent  
55  
56 554 physical activity. *Health Psychology Report*. 2017;4:333-44.  
57  
58  
59  
60

- 1  
2  
3 555 39. Faulkner G, Mitra R, Buliung R, Fusco C, Stone M. Children's outdoor playtime, physical  
4 556 activity, and parental perceptions of the neighbourhood environment. *International Journal of Play*.  
5 557 2015;4(1):84-97.  
6  
7  
8  
9 558 40. Aranda-Balboa MJ, Chillón P, Saucedo-Araujo RG, Molina-García J, Huertas-Delgado FJ.  
10 559 Children and Parental Barriers to Active Commuting to School: A Comparison Study. *Int J Environ Res*  
11 560 *Public Health*. 2021;18(5).  
12  
13  
14  
15 561 41. Christian HE, Klinker CD, Villanueva K, Knuiman MW, Foster SA, Zubrick SR, et al. The  
16 562 Effect of the Social and Physical Environment on Children's Independent Mobility to Neighborhood  
17 563 Destinations. *J Phys Act Health*. 2015;12 Suppl 1:S84-93.  
18  
19  
20  
21  
22 564 42. Kyttä M, Oliver M, Ikeda E, Ahmadi E, Omiya I, Laatikainen T. Children as urbanites: mapping  
23 565 the affordances and behavior settings of urban environments for Finnish and Japanese children.  
24 566 *Children's Geographies*. 2018;16(3):319-32.  
25  
26  
27  
28 567 43. Veitch J, Carver A, Salmon J, Abbott G, Ball K, Crawford D, et al. What predicts children's  
29 568 active transport and independent mobility in disadvantaged neighborhoods? *Health & Place*.  
30 569 2017;44:103-9.  
31  
32  
33  
34 570 44. Bujang MA, Sa'at N, Sidik T, Joo LC. Sample Size Guidelines for Logistic Regression from  
35 571 Observational Studies with Large Population: Emphasis on the Accuracy Between Statistics and  
36 572 Parameters Based on Real Life Clinical Data. *Malays J Med Sci*. 2018;25(4):122-30.  
37  
38  
39  
40  
41 573 45. Eggs J, Follmer R, Gruschwitz D, Nobis C, Bäumer M, Pfeiffer M. *Mobilität in Deutschland -*  
42 574 *MiD Methodenbericht. Studie vom infas, DLR, IVT und infas 360 im Auftrag des Bundesministers für*  
43 575 *Verkehr und digitale Infrastruktur. Bonn, Berlin: [www.mobilität-in-deutschland.de](http://www.mobilität-in-deutschland.de); 2018.*  
44  
45  
46  
47 576 46. Villanueva K, Giles-Corti B, Bulsara M, Trapp G, Timperio A, McCormack G, et al. Does the  
48 577 walkability of neighbourhoods affect children's independent mobility, independent of parental, socio-  
49 578 cultural and individual factors? *Children's Geographies*. 2014;12(4):393-411.  
50  
51  
52  
53 579 47. Blanz M. *Forschungsmethoden und Statistik für die Soziale Arbeit: Grundlagen und*  
54 580 *Anwendungen: Kohlhammer Verlag; 2021.*  
55  
56  
57  
58 581 48. Statistisches Bundesamt. *Statistik und Wirtschaft - Demographische Standards*. Wiesbaden:  
59 582 *Statistisches Bundesamt 2016.*

- 1  
2  
3 583 49. Behrens K, Böltken F, Dittmar H, Götttsche F, Gutfleisch R, Habla H, et al. Regionale Standards:  
4  
5 584 Ausgabe 2019. Köln2019.
- 6  
7 585 50. Baumeister SE, Ricci C, Kohler S, Fischer B, Töpfer C, Finger JD, et al. Physical activity  
8  
9 586 surveillance in the European Union: reliability and validity of the European Health Interview Survey-  
10  
11 587 Physical Activity Questionnaire (EHIS-PAQ). *International Journal of Behavioral Nutrition and*  
12  
13 588 *Physical Activity*. 2016;13(1):61.
- 14  
15 589 51. Schmidt SCE, Will N, Henn A, Reimers A, Woll A. Der Motorik-Modul Aktivitätsfragebogen  
16  
17 590 MoMo-AFB : Leitfaden zur Anwendung und Auswertung. 2016.
- 18  
19 591 52. Huertas-Delgado FJ, Molina-García J, Van Dyck D, Chillón P. A questionnaire to assess  
20  
21 592 parental perception of barriers towards active commuting to school (PABACS): Reliability and validity.  
22  
23 593 *J Transp Health*. 2019;12:97-104.
- 24  
25 594 53. Lu W, McKyer ELJ, Lee C, Ory MG, Goodson P, Wang S. Children's active commuting to  
26  
27 595 school: an interplay of self-efficacy, social economic disadvantage, and environmental characteristics.  
28  
29 596 *International Journal of Behavioral Nutrition and Physical Activity*. 2015;12(1):29.
- 30  
31 597 54. Fallah Zavareh M, Mehdizadeh M, Nordfjærn T. Active travel as a pro-environmental  
32  
33 598 behaviour: An integrated framework. *Transportation Research Part D: Transport and Environment*.  
34  
35 599 2020;84:102356.
- 36  
37 600 55. Dutta-Bergman MJ. Primary sources of health information: comparisons in the domain of health  
38  
39 601 attitudes, health cognitions, and health behaviors. *Health Commun*. 2004;16(3):273-88.
- 40  
41 602 56. Jekauc D, Wagner MO, Kahlert D, Woll A. Reliabilität und Validität des MoMo-  
42  
43 603 Aktivitätsfragebogens für Jugendliche (MoMo-AFB). *Diagnostica*. 2013.
- 44  
45 604 57. Segura-Diaz JM, Rojas-Jimenez A, Barranco-Ruiz Y, Murillo-Pardo B, Saucedo-Araujo RG,  
46  
47 605 Aranda-Balboa MJ, et al. Feasibility and Reliability of a Questionnaire to Assess the Mode, Frequency,  
48  
49 606 Distance and Time of Commuting to and from School: The PACO Study. *Int J Environ Res Public*  
50  
51 607 *Health*. 2020;17(14).
- 52  
53 608 58. Molina-Garcia J, Queralt A, Estevan I, Alvarez O, Castillo I. [Perceived barriers to active  
54  
55 609 commuting to school: reliability and validity of a scale]. *Gac Sanit*. 2016;30(6):426-31.
- 56  
57  
58  
59  
60

- 1  
2  
3 610 59. Burgueño R, González-Cutre D, Sevil-Serrano J, Herrador-Colmenero M, Segura-Díaz JM,  
4  
5 611 Medina-Casaubón J, et al. Psychometric properties of the teachers', parents' and peers' versions of the  
6  
7 612 Perceived Autonomy Support Scale for Active Commuting to and from School (PASS-ACS) in children  
8  
9 613 and adolescents. *Travel Behav Soc.* 2020;20:322-30.
- 11 614 60. Burgueño R, González-Cutre D, Sevil-Serrano J, Herrador-Colmenero M, Segura-Díaz JM,  
12  
13 615 Medina-Casaubón J, et al. Validation of the Basic Psychological Need Satisfaction in Active  
14  
15 616 Commuting to and from School (BPNS-ACS) Scale in Spanish young people. *J Transp Health.*  
16  
17 617 2020;16:100825.
- 19 618 61. Burgueño R, González-Cutre D, Sevil-Serrano J, Herrador-Colmenero M, Segura-Díaz JM,  
20  
21 619 Medina-Casaubón J, et al. Understanding the motivational processes involved in adolescents' active  
22  
23 620 commuting behaviour: Development and validation of the Behavioural Regulation in Active  
24  
25 621 Commuting to and from School (BR-ACS) Questionnaire. *Transport Res F-Traf.* 2019;62:615-25.
- 27 622 62. Beasley T, Schumacker R. Multiple Regression Approach to Analyzing Contingency Tables:  
28  
29 623 Post Hoc and Planned Comparison Procedures. *Journal of Experimental Education - J EXP EDUC.*  
30  
31 624 1995;64:79-93.
- 33 625 63. Nagl-Cupal M. Theoretical Sampling. *ProCare.* 2013;18(10):20-2.
- 35 626 64. Braun V, Clarke V. Using thematic analysis in psychology. *Qualitative Research in Psychology.*  
36  
37 627 2006;3(2):77-101.
- 39 628 65. Mayring P, Fenzl T. Qualitative Inhaltsanalyse. *Handbuch - Methoden der empirischen*  
40  
41 629 *Sozialforschung: Springer; 2019. p. 633-48.*
- 43 630 66. Visseren FLJ, Mach F, Smulders YM, Carballo D, Koskinas KC, Bäck M, et al. 2021 ESC  
44  
45 631 Guidelines on cardiovascular disease prevention in clinical practice: Developed by the Task Force for  
46  
47 632 cardiovascular disease prevention in clinical practice with representatives of the European Society of  
48  
49 633 Cardiology and 12 medical societies With the special contribution of the European Association of  
50  
51 634 Preventive Cardiology (EAPC). *Eur Heart J.* 2021;42(34):3227-337.
- 53 635 67. Hammarberg K, Kirkman M, de Lacey S. Qualitative research methods: when to use them and  
54  
55 636 how to judge them. *Hum Reprod.* 2016;31(3):498-501.

- 1  
2  
3 637 68. Sigmundova D, Sigmund E, Badura P, Hollein T. Parent-Child Physical Activity Association in  
4  
5 638 Families With 4-to 16-Year-Old Children. *Int J Environ Res Public Health*. 2020;17(11).  
6  
7 639 69. Reimers AK, Boxberger K, Schmidt SCE, Niessner C, Demetriou Y, Marzi I, et al. Social  
8  
9 640 Support and Modelling in Relation to Physical Activity Participation and Outdoor Play in Preschool  
10  
11 641 Children. *Children*. 2019;6(10):115.  
12  
13 642 70. Rodriguez-Rodriguez F, Huertas-Delgado FJ, Barranco-Ruiz Y, Aranda-Balboa MJ, Chillon P.  
14  
15 643 Are the Parents' and Their Children's Physical Activity and Mode of Commuting Associated? Analysis  
16  
17 644 by Gender and Age Group. *Int J Environ Res Public Health*. 2020;17(18).  
18  
19 645 71. Huertas-Delgado FJ, Herrador-Colmenero M, Villa-Gonzalez E, Aranda-Balboa MJ, Caceres  
20  
21 646 MV, Mandic S, et al. Parental perceptions of barriers to active commuting to school in Spanish children  
22  
23 647 and adolescents. *Eur J Public Health*. 2017;27(3):416-21.  
24  
25 648 72. Yen BTH, Mulley C, Burke M. Gamification in transport interventions: Another way to improve  
26  
27 649 travel behavioural change. *Cities*. 2019;85:140-9.  
28  
29 650 73. Yang XL, Telama R, Hirvensalo M, Tammelin T, Viikari JSA, Raitakari OT. Active commuting  
30  
31 651 from youth to adulthood and as a predictor of physical activity in early midlife: The Young Finns Study.  
32  
33 652 *Prev Med*. 2014;59:5-11.  
34  
35 653 74. Ramanathan S, O'Brien C, Faulkner G, Stone M. Happiness in motion: emotions, well-being,  
36  
37 654 and active school travel. *J Sch Health*. 2014;84(8):516-23.  
38  
39 655 75. Schäfer C, Mayr B, Fernandez La Puente de Battre MD, Reich B, Schmied C, Loidl M, et al.  
40  
41 656 Health effects of active commuting to work: The available evidence before GISMO. *Scandinavian*  
42  
43 657 *journal of medicine & science in sports*. 2020;30 Suppl 1(Suppl 1):8-14.  
44  
45 658 76. Mueller N, Rojas-Rueda D, Cole-Hunter T, de Nazelle A, Dons E, Gerike R, et al. Health impact  
46  
47 659 assessment of active transportation: A systematic review. *Prev Med*. 2015;76:103-14.  
48  
49 660 77. Xu HL, Wen LM, Rissel C. The Relationships Between Active Transport to Work or School  
50  
51 661 and Cardiovascular Health or Body Weight: A Systematic Review. *Asia Pac J Public Health*.  
52  
53 662 2013;25(4):298-315.  
54  
55  
56  
57  
58  
59  
60

1  
2  
3 663 78. Chillon P, Ortega FB, Ruiz JR, Veidebaum T, Oja L, Maestu J, et al. Active commuting to  
4  
5 664 school in children and adolescents: An opportunity to increase physical activity and fitness. Scand J  
6  
7 665 Public Health. 2010;38(8):873-9.

8  
9 666 79. Lubans DR, Boreham CA, Kelly P, Foster CE. The relationship between active travel to school  
10  
11 667 and health-related fitness in children and adolescents: a systematic review. Int J Behav Nutr Phys Act.  
12  
13 668 2011;8:5.

14  
15 669 80. Brand C, Dons E, Anaya Boig E, Avila-Palencia I, Clark A, Nazelle A, et al. The climate change  
16  
17 670 mitigation effects of daily active travel in cities. Transportation Research Part D: Transport and  
18  
19 671 Environment. 2021;93:102764.

20  
21 672 81. Giles-Corti B, Foster S, Shilton T, Falconer R. The co-benefits for health of investing in active  
22  
23 673 transportation. New South Wales Public Health Bulletin. 2010;21(5-6):122-7.

24  
25  
26 674

27  
28  
29 675  
30  
31  
32  
33  
34  
35  
36  
37  
38  
39  
40  
41  
42  
43  
44  
45  
46  
47  
48  
49  
50  
51  
52  
53  
54  
55  
56  
57  
58  
59  
60

1  
2  
3  
4  
5  
6  
7  
8  
9  
10  
11  
12  
13  
14  
15  
16  
17  
18  
19  
20  
21  
22  
23  
24  
25  
26  
27  
28  
29  
30  
31  
32  
33  
34  
35  
36  
37  
38  
39  
40  
41  
42  
43  
44  
45  
46

1

For peer review only



1  
2  
3  
4  
5  
6  
7  
8  
9  
10  
11  
12  
13  
14  
15  
16  
17  
18  
19  
20  
21  
22  
23  
24  
25  
26  
27  
28  
29  
30  
31  
32  
33  
34  
35  
36  
37  
38  
39  
40  
41  
42  
43  
44  
45  
46

# BMJ Open



## Supplementary material

### A. Interview guideline - parents

| Interview topic (general)                 | Guiding question                                                                                                                | Interview topic (specific) | Follow-up questions I                                                                                                    | Follow-up questions II                                                          |
|-------------------------------------------|---------------------------------------------------------------------------------------------------------------------------------|----------------------------|--------------------------------------------------------------------------------------------------------------------------|---------------------------------------------------------------------------------|
| <b>Interview guide for situations 1-4</b> |                                                                                                                                 |                            |                                                                                                                          |                                                                                 |
| Way - decision making process             | Think again carefully about the situation before your child left with [mode of travel]. Can you describe the situation at home? | Stress                     | Can you describe the situation at home in detail?                                                                        | Was there anything special about the day?                                       |
|                                           |                                                                                                                                 | Weather                    | What was the weather like?                                                                                               |                                                                                 |
|                                           |                                                                                                                                 | Behavior                   | Can you describe what you did before your child left home?                                                               | How did you feel about it? / How did it make you feel?                          |
|                                           |                                                                                                                                 | Behavior family            | How did you behave? How did your child / siblings behave?                                                                | How did you feel about it?                                                      |
|                                           |                                                                                                                                 | Decision                   | Who decided that your child used [mode of travel]?<br>Can you describe the extent to which you influenced this decision? | Can you describe what was running through your mind when you made the decision? |
|                                           |                                                                                                                                 | Rules                      | Are there any rules in the family regarding [mode of travel]?                                                            | Can you describe why these rules exist / are important to you?                  |
|                                           |                                                                                                                                 | Persuasion/reason          | Can you remember a specific reason why your child used [mode of travel]?                                                 | Is there a personal persuasion behind them?                                     |
|                                           |                                                                                                                                 | Motivation                 | To what extent did you motivate your child to use [mode of travel]?                                                      |                                                                                 |
| Way – physical environment                | Do you know where your child drove/walked along?                                                                                | Parental perspective       | How do you feel about the way?<br>Is there anything on the way that worries you?                                         | How do you deal with it?                                                        |

1  
2  
3  
4  
5  
6  
7  
8  
9  
10  
11  
12  
13  
14  
15  
16  
17  
18  
19  
20  
21  
22  
23  
24  
25  
26  
27  
28  
29  
30  
31  
32  
33  
34  
35  
36  
37  
38  
39  
40  
41  
42  
43  
44  
45  
46

|                                         |                                                                                                                                                                                 |                      |                                                                                                       |                                                                                                          |
|-----------------------------------------|---------------------------------------------------------------------------------------------------------------------------------------------------------------------------------|----------------------|-------------------------------------------------------------------------------------------------------|----------------------------------------------------------------------------------------------------------|
|                                         | Can you describe the way as precisely as possible so that I can get an idea?                                                                                                    | Child's perspective  | How do you think your child likes the way?                                                            | How do you feel about it?                                                                                |
|                                         |                                                                                                                                                                                 | Behavior child – way | Can you describe what your child has done/experienced along the way?                                  |                                                                                                          |
| Way – social environment                | Did someone accompany your child?                                                                                                                                               | Friends company      | How does it happen?                                                                                   | What do you say to that?                                                                                 |
|                                         |                                                                                                                                                                                 | Parents company      | What do you do on the way together? Can you describe why you accompany your child?                    | How is this for you - to use [mode of travel] with your child?                                           |
| <b>Interview guide for situations 5</b> |                                                                                                                                                                                 |                      |                                                                                                       |                                                                                                          |
| Fictional way to school                 | Now please think about tomorrow, when your child goes to school. How do you plan (together with your child) the way to school? Or does your child plan the way to school alone? | Relevant factors     | What factors are you or your child considering for planning tomorrow? What are you thinking about it? | What would change your decision? Are you satisfied with the decision? How do you evaluate this decision? |
|                                         |                                                                                                                                                                                 | Decision             | To what extent do you involve your child?                                                             |                                                                                                          |

## B. Interview guideline - youth

| Interview topic (general)                 | Guiding question                                                                                                                   | Interview topic (specific) | Follow-up questions I                                                                       | Follow-up questions II                                                                                                                           |
|-------------------------------------------|------------------------------------------------------------------------------------------------------------------------------------|----------------------------|---------------------------------------------------------------------------------------------|--------------------------------------------------------------------------------------------------------------------------------------------------|
| <b>Interview guide for situations 1-4</b> |                                                                                                                                    |                            |                                                                                             |                                                                                                                                                  |
| Way – decision making process             | Think again exactly about the situation before you [mode of travel]. Can you describe how it came about that you [mode of travel]? | Stress                     | What was the situation like?<br>Was it stressful?                                           | Was there anything special about the day?                                                                                                        |
|                                           |                                                                                                                                    | Weather                    | What was the weather like?                                                                  |                                                                                                                                                  |
|                                           |                                                                                                                                    | Behavior                   | What did you do before you left the house?                                                  |                                                                                                                                                  |
|                                           |                                                                                                                                    | Behavior family            | How did you behave? How did your mom/dad/siblings behave?                                   | How did you feel at that time?<br>What was running through your mind?                                                                            |
|                                           |                                                                                                                                    | Decision                   | Who decided that you [mode of travel]?/ How did you decide to [mode of travel]?             | How do you feel about that? That you can decide alone / That your parents decide for you? How did you come to your decision to [mode of travel]? |
|                                           |                                                                                                                                    | Rules                      | Are there any rules in your family?                                                         | Do you know why your parents make the decision the way they do?                                                                                  |
|                                           |                                                                                                                                    | Persuasion/reason          | Was there anything in particular that convinced you to [mode of travel]?                    |                                                                                                                                                  |
| Way – physical environment                | Think about where you drove/walked along. Can you describe the way exactly so that I can get an idea of it?                        | Motivation                 | What did motivate you?                                                                      |                                                                                                                                                  |
|                                           |                                                                                                                                    | Distance                   | How long did you spend on the way?<br>How far is the way?                                   | How do you feel about the way?                                                                                                                   |
|                                           |                                                                                                                                    | Behavior                   | How did you drive/walk? Do you do anything special on the way?                              | How did you feel while [mode of travel]? How was [mode of travel] for you?                                                                       |
|                                           |                                                                                                                                    | Way - characteristics      | How did you like the way? What do you like about the way?<br>What do you not like about it? |                                                                                                                                                  |

1  
2  
3  
4  
5  
6  
7  
8  
9  
10  
11  
12  
13  
14  
15  
16  
17  
18  
19  
20  
21  
22  
23  
24  
25  
26  
27  
28  
29  
30  
31  
32  
33  
34  
35  
36  
37  
38  
39  
40  
41  
42  
43  
44  
45  
46

---

|                          |                                                                                           |         |                                                                                             |                                                                                                                               |
|--------------------------|-------------------------------------------------------------------------------------------|---------|---------------------------------------------------------------------------------------------|-------------------------------------------------------------------------------------------------------------------------------|
|                          |                                                                                           |         | What did you like about [mode of travel]?                                                   |                                                                                                                               |
| Way – social environment | Did anyone accompany you on the way? Can you describe the situation on the way in detail? | Company | Can you tell me about how you rode together?<br>Can you tell me what you did along the way? | What was it like between you? Was there anything that you particularly liked?<br>Was there anything you did not like so much? |
|                          |                                                                                           |         | Do you meet other people along the way?                                                     |                                                                                                                               |

---

**Interview guide for situation 5**

---

|                         |                                                                                                                          |                              |                                                                                                                                                                                                     |                                                                                                                |
|-------------------------|--------------------------------------------------------------------------------------------------------------------------|------------------------------|-----------------------------------------------------------------------------------------------------------------------------------------------------------------------------------------------------|----------------------------------------------------------------------------------------------------------------|
| Fictional way to school | Now think about tomorrow. Can you describe to me how you decide how to get to school? How do you plan the way to school? | Relevant factors<br>Decision | Which factors do you take into account in the planning?<br>What are you considering?<br>Do you check with your parents?<br>Whom do you involve in the decision?<br>How do you come to the decision? | What would change your decision?<br>Are you satisfied with the decision?<br>How do you evaluate this decision? |
|-------------------------|--------------------------------------------------------------------------------------------------------------------------|------------------------------|-----------------------------------------------------------------------------------------------------------------------------------------------------------------------------------------------------|----------------------------------------------------------------------------------------------------------------|

---
