# Supplementary material for: Active travel behaviour in the family environment: protocol for the mixed-methods cross-sectional ARRIVE study
Source: PubMed Central journal article supplement — BMJ Open. 2022 Feb 1;12(2):e056383. doi: 10.1136/bmjopen-2021-056383 (PMC8808462; doi:10.1136/bmjopen-2021-056383), 2022-02-01
Supplement: bmjopen-2021-056383supp001.pdf [file bmjopen-2021-056383supp001.pdf]

## Supplementary material

### A. Interview guideline - parents

| Interview topic (general)                 | Guiding question                                                                                                                | Interview topic (specific) | Follow-up questions I                                                                                                    | Follow-up questions II                                                          |
|-------------------------------------------|---------------------------------------------------------------------------------------------------------------------------------|----------------------------|--------------------------------------------------------------------------------------------------------------------------|---------------------------------------------------------------------------------|
| <b>Interview guide for situations 1-4</b> |                                                                                                                                 |                            |                                                                                                                          |                                                                                 |
| Way - decision making process             | Think again carefully about the situation before your child left with [mode of travel]. Can you describe the situation at home? | Stress                     | Can you describe the situation at home in detail?                                                                        | Was there anything special about the day?                                       |
|                                           |                                                                                                                                 | Weather                    | What was the weather like?                                                                                               |                                                                                 |
|                                           |                                                                                                                                 | Behavior                   | Can you describe what you did before your child left home?                                                               | How did you feel about it? / How did it make you feel?                          |
|                                           | Can you describe how the decision was made/how it came about that your child chose [mode of travel]?                            | Behavior family            | How did you behave? How did your child / siblings behave?                                                                | How did you feel about it?                                                      |
|                                           |                                                                                                                                 | Decision                   | Who decided that your child used [mode of travel]?<br>Can you describe the extent to which you influenced this decision? | Can you describe what was running through your mind when you made the decision? |
|                                           |                                                                                                                                 | Rules                      | Are there any rules in the family regarding [mode of travel]?                                                            | Can you describe why these rules exist / are important to you?                  |
|                                           |                                                                                                                                 | Persuasion/reason          | Can you remember a specific reason why your child used [mode of travel]?                                                 | Is there a personal persuasion behind them?                                     |
| Motivation                                | To what extent did you motivate your child to use [mode of travel]?                                                             |                            |                                                                                                                          |                                                                                 |
| Way – physical environment                | Do you know where your child drove/walked along?                                                                                | Parental perspective       | How do you feel about the way?<br>Is there anything on the way that worries you?                                         | How do you deal with it?                                                        |

|                                         |                                                                                                                                                                                 |                                                 |                                                                                                                                                        |                                                                                                          |
|-----------------------------------------|---------------------------------------------------------------------------------------------------------------------------------------------------------------------------------|-------------------------------------------------|--------------------------------------------------------------------------------------------------------------------------------------------------------|----------------------------------------------------------------------------------------------------------|
|                                         | Can you describe the way as precisely as possible so that I can get an idea?                                                                                                    | Child's perspective<br><br>Behavior child – way | How do you think your child likes the way?<br><br>Can you describe what your child has done/experienced along the way?                                 | How do you feel about it?                                                                                |
| Way – social environment                | Did someone accompany your child?                                                                                                                                               | Friends company<br><br>Parents company          | How does it happen?<br><br>What do you do on the way together? Can you describe why you accompany your child?                                          | What do you say to that?<br><br>How is this for you - to use [mode of travel] with your child?           |
| <b>Interview guide for situations 5</b> |                                                                                                                                                                                 |                                                 |                                                                                                                                                        |                                                                                                          |
| Fictional way to school                 | Now please think about tomorrow, when your child goes to school. How do you plan (together with your child) the way to school? Or does your child plan the way to school alone? | Relevant factors<br><br>Decision                | What factors are you or your child considering for planning tomorrow? What are you thinking about it?<br><br>To what extent do you involve your child? | What would change your decision? Are you satisfied with the decision? How do you evaluate this decision? |

**B. Interview guideline - youth**

| <b>Interview topic (general)</b>          | <b>Guiding question</b>                                                                                                            | <b>Interview topic (specific)</b> | <b>Follow-up questions I</b>                                                                | <b>Follow-up questions II</b>                                                                                                                    |
|-------------------------------------------|------------------------------------------------------------------------------------------------------------------------------------|-----------------------------------|---------------------------------------------------------------------------------------------|--------------------------------------------------------------------------------------------------------------------------------------------------|
| <b>Interview guide for situations 1-4</b> |                                                                                                                                    |                                   |                                                                                             |                                                                                                                                                  |
| Way – decision making process             | Think again exactly about the situation before you [mode of travel]. Can you describe how it came about that you [mode of travel]? | Stress                            | What was the situation like?<br>Was it stressful?                                           | Was there anything special about the day?                                                                                                        |
|                                           |                                                                                                                                    | Weather                           | What was the weather like?                                                                  |                                                                                                                                                  |
|                                           |                                                                                                                                    | Behavior                          | What did you do before you left the house?                                                  |                                                                                                                                                  |
|                                           | Tell me about how all went with your parents.                                                                                      | Behavior family                   | How did you behave? How did your mom/dad/siblings behave?                                   | How did you feel at that time?<br>What was running through your mind?                                                                            |
|                                           |                                                                                                                                    | Decision                          | Who decided that you [mode of travel]?/ How did you decide to [mode of travel]?             | How do you feel about that? That you can decide alone / That your parents decide for you? How did you come to your decision to [mode of travel]? |
|                                           |                                                                                                                                    | Rules                             | Are there any rules in your family?                                                         | Do you know why your parents make the decision the way they do?                                                                                  |
| Way – physical environment                | Think about where you drove/walked along.<br>Can you describe the way exactly so that I can get an idea of it?                     | Persuasion/reason                 | Was there anything in particular that convinced you to [mode of travel]?                    |                                                                                                                                                  |
|                                           |                                                                                                                                    | Motivation                        | What did motivate you?                                                                      |                                                                                                                                                  |
|                                           |                                                                                                                                    | Distance                          | How long did you spend on the way?<br>How far is the way?                                   | How do you feel about the way?                                                                                                                   |
|                                           |                                                                                                                                    | Behavior                          | How did you drive/walk? Do you do anything special on the way?                              | How did you feel while [mode of travel]? How was [mode of travel] for you?                                                                       |
|                                           |                                                                                                                                    | Way - characteristics             | How did you like the way? What do you like about the way?<br>What do you not like about it? |                                                                                                                                                  |

|                                        |                                                                                                                          |                                  |                                                                                                                                                                                                     |                                                                                                                                  |
|----------------------------------------|--------------------------------------------------------------------------------------------------------------------------|----------------------------------|-----------------------------------------------------------------------------------------------------------------------------------------------------------------------------------------------------|----------------------------------------------------------------------------------------------------------------------------------|
|                                        |                                                                                                                          |                                  | What did you like about [mode of travel]?                                                                                                                                                           |                                                                                                                                  |
| Way – social environment               | Did anyone accompany you on the way? Can you describe the situation on the way in detail?                                | Company                          | Can you tell me about how you rode together?<br>Can you tell me what you did along the way?<br><br>Do you meet other people along the way?                                                          | What was it like between you?<br>Was there anything that you particularly liked?<br>Was there anything you did not like so much? |
| <b>Interview guide for situation 5</b> |                                                                                                                          |                                  |                                                                                                                                                                                                     |                                                                                                                                  |
| Fictional way to school                | Now think about tomorrow. Can you describe to me how you decide how to get to school? How do you plan the way to school? | Relevant factors<br><br>Decision | Which factors do you take into account in the planning?<br>What are you considering?<br>Do you check with your parents?<br>Whom do you involve in the decision?<br>How do you come to the decision? | What would change your decision?<br>Are you satisfied with the decision?<br>How do you evaluate this decision?                   |
